# Supplementary material
Source: PubMed Central journal article supplement (PMC8201757)
Supplement: ml1c00218_si_002.pdf [file ml1c00218_si_002.pdf]

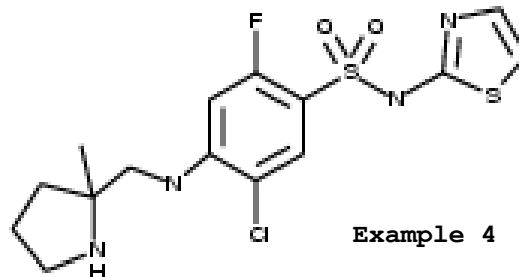

```

=====
Injection Date   : Mon, 27. Aug. 2012
Acq Operator    : AL260
Location        : P1-E-06
Inj. Vol.       : 5.0 ul
Acq Method      : C:\CHEM32\1\METHODS\WUXIAB01-G.M
Data Filename   : K:\120827ZG\ZGHR1EF1.D
LC-MS
    
```

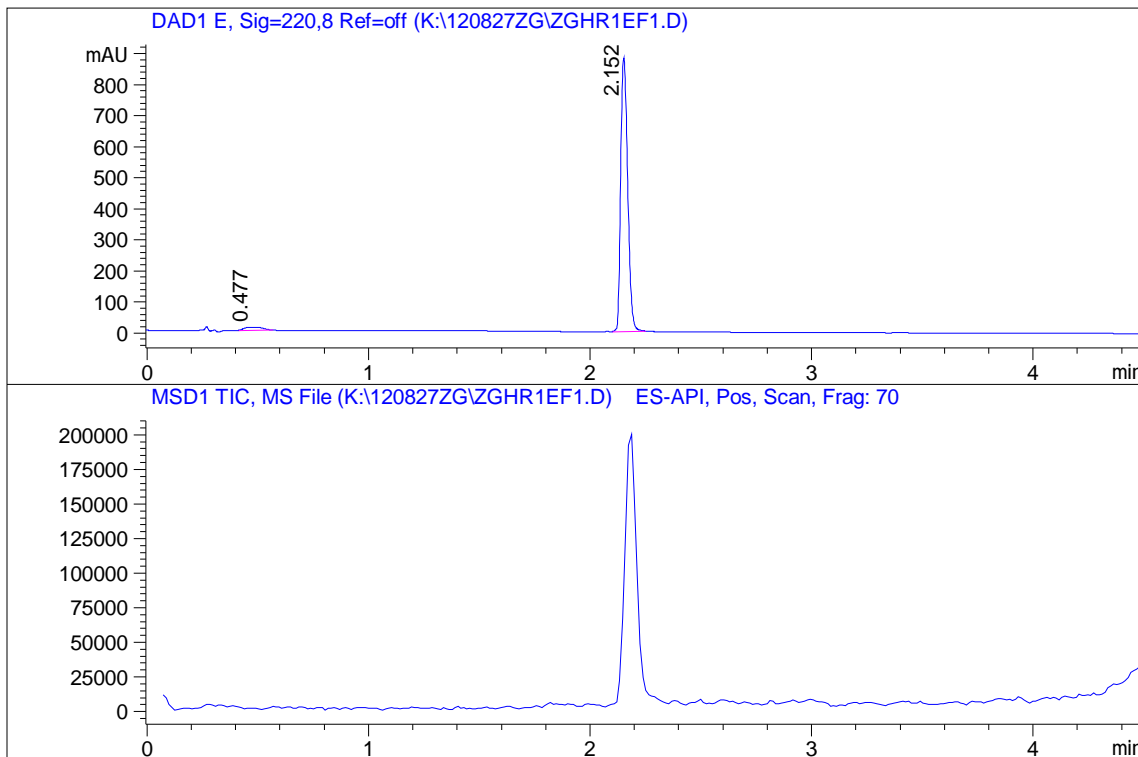

Report

```

=====
Signal 1 : DAD1 E, Sig=220,8 Ref=off
    
```

| Peak # | RT [min] | Area     | Height  | Height % | Width [min] | Area % |
|--------|----------|----------|---------|----------|-------------|--------|
| 1      | 0.477    | 57.547   | 10.031  | 1.125    | 0.096       | 2.890  |
| 2      | 2.152    | 1933.484 | 881.428 | 98.875   | 0.035       | 97.110 |

```

=====
    
```

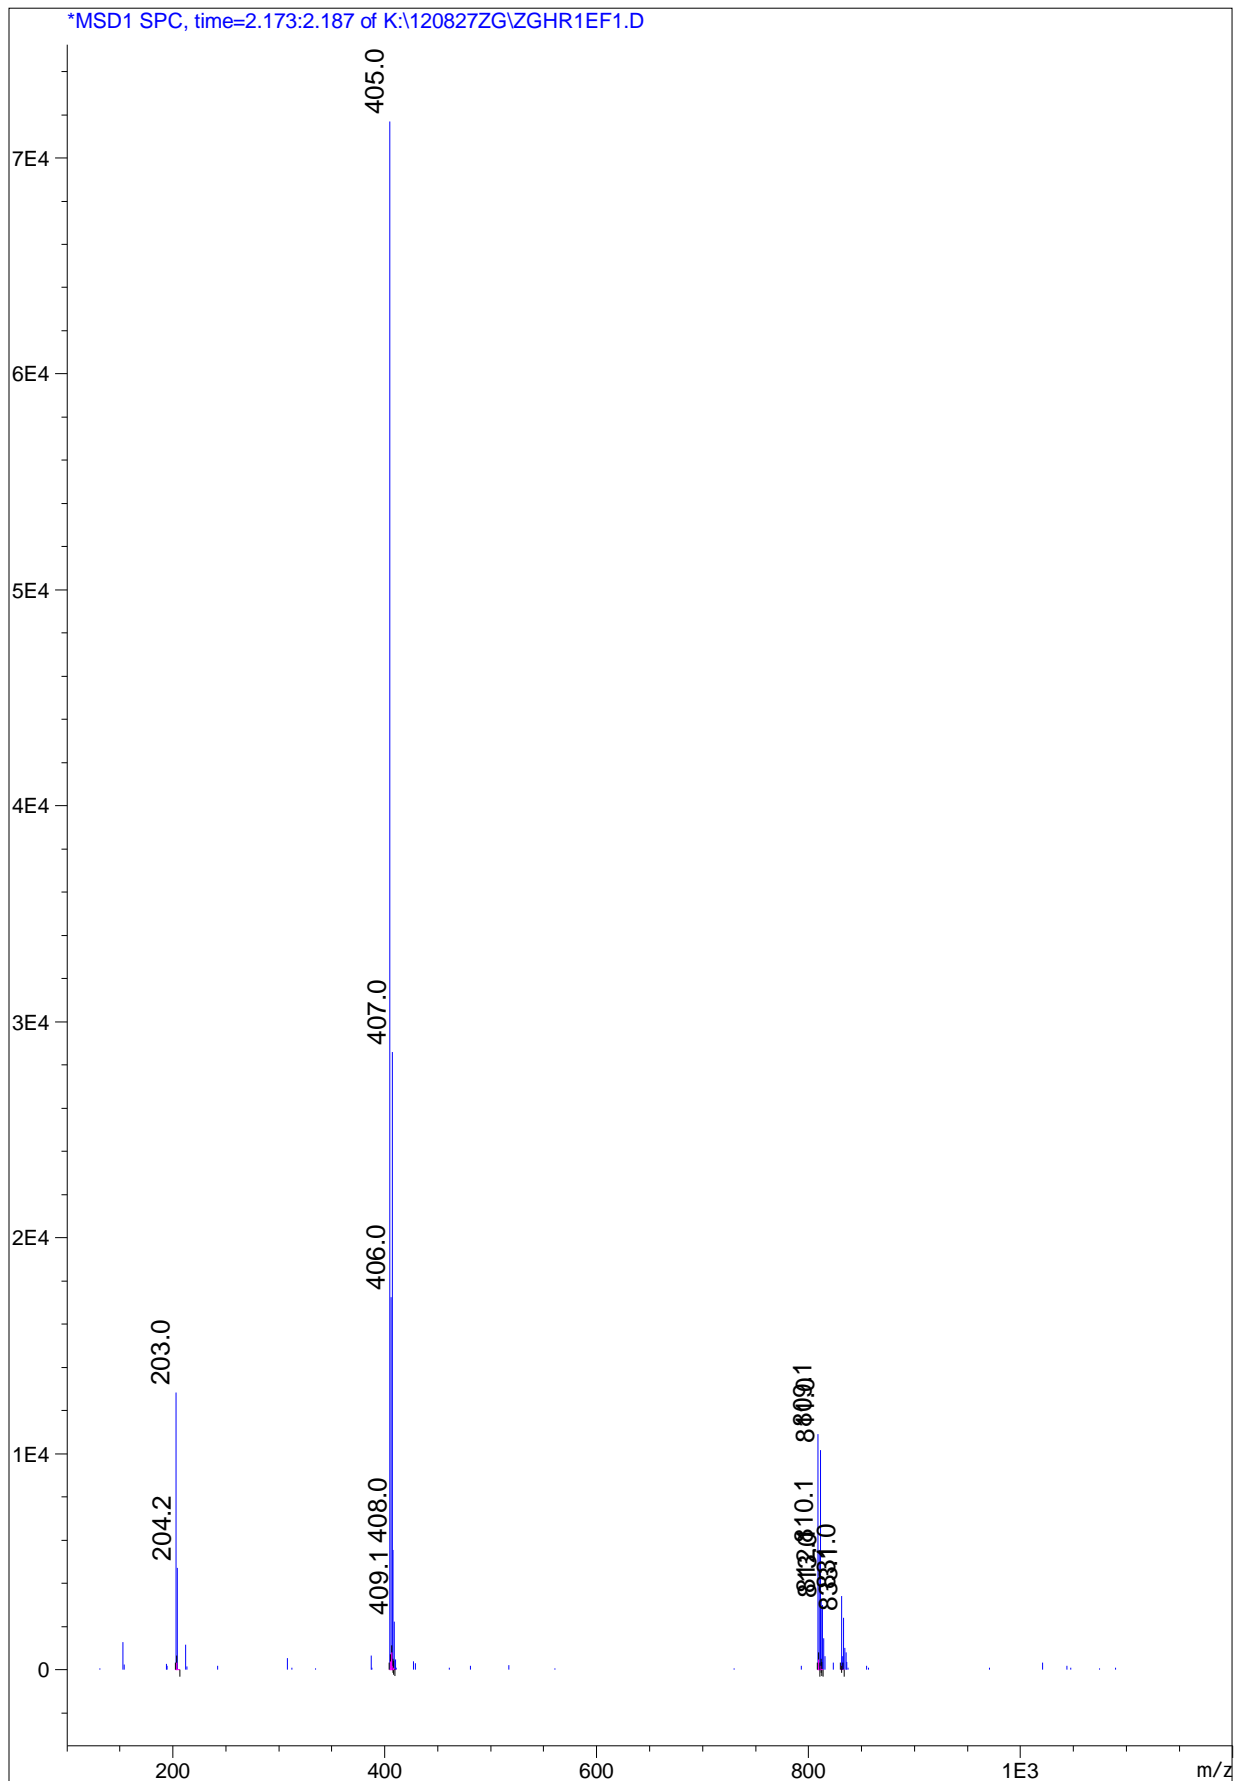

\*MSD1 SPC, time=0.478:0.530 of K:\120827ZG\ZGHR1EF1.D

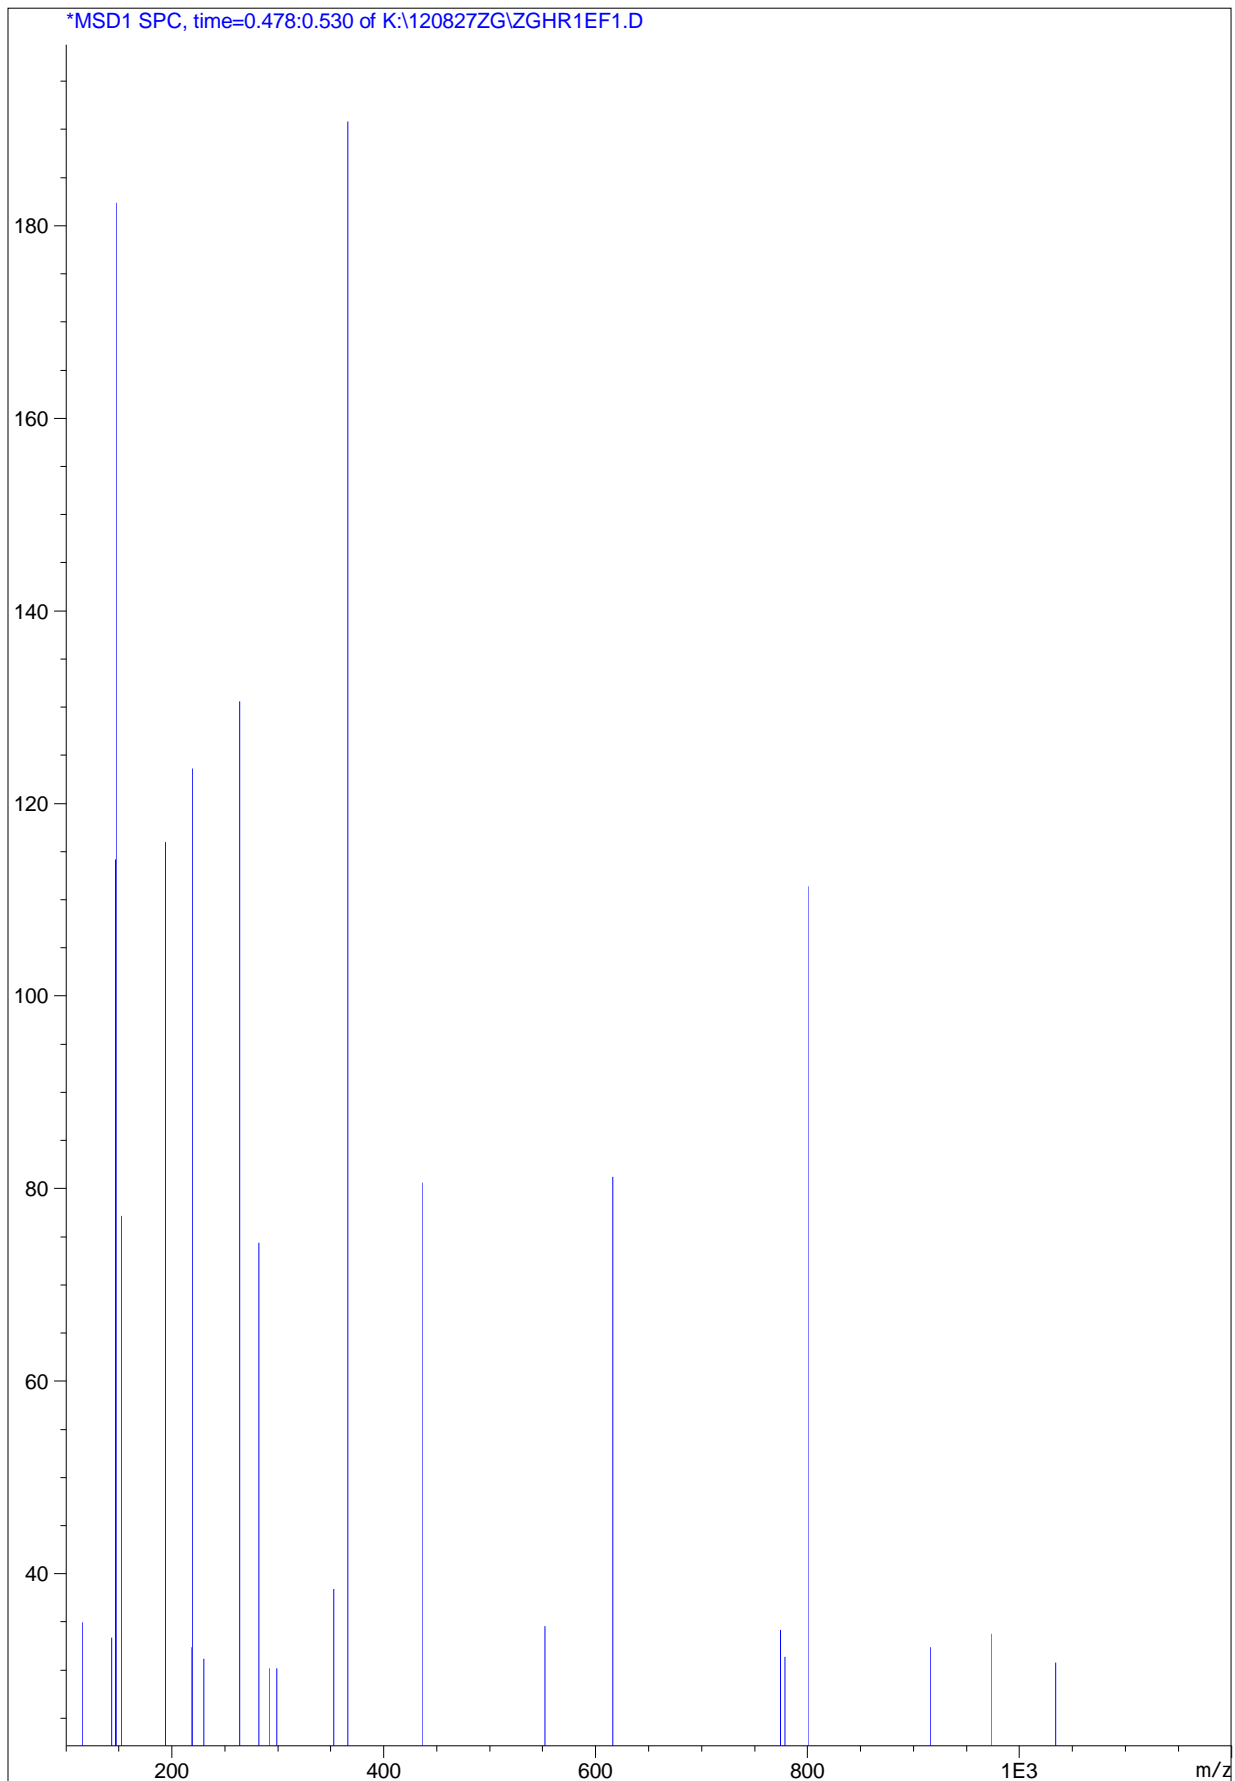

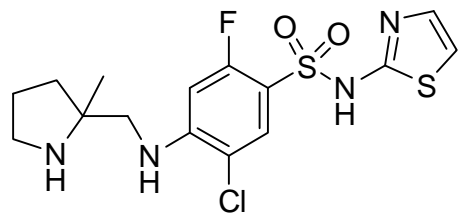

Example 4

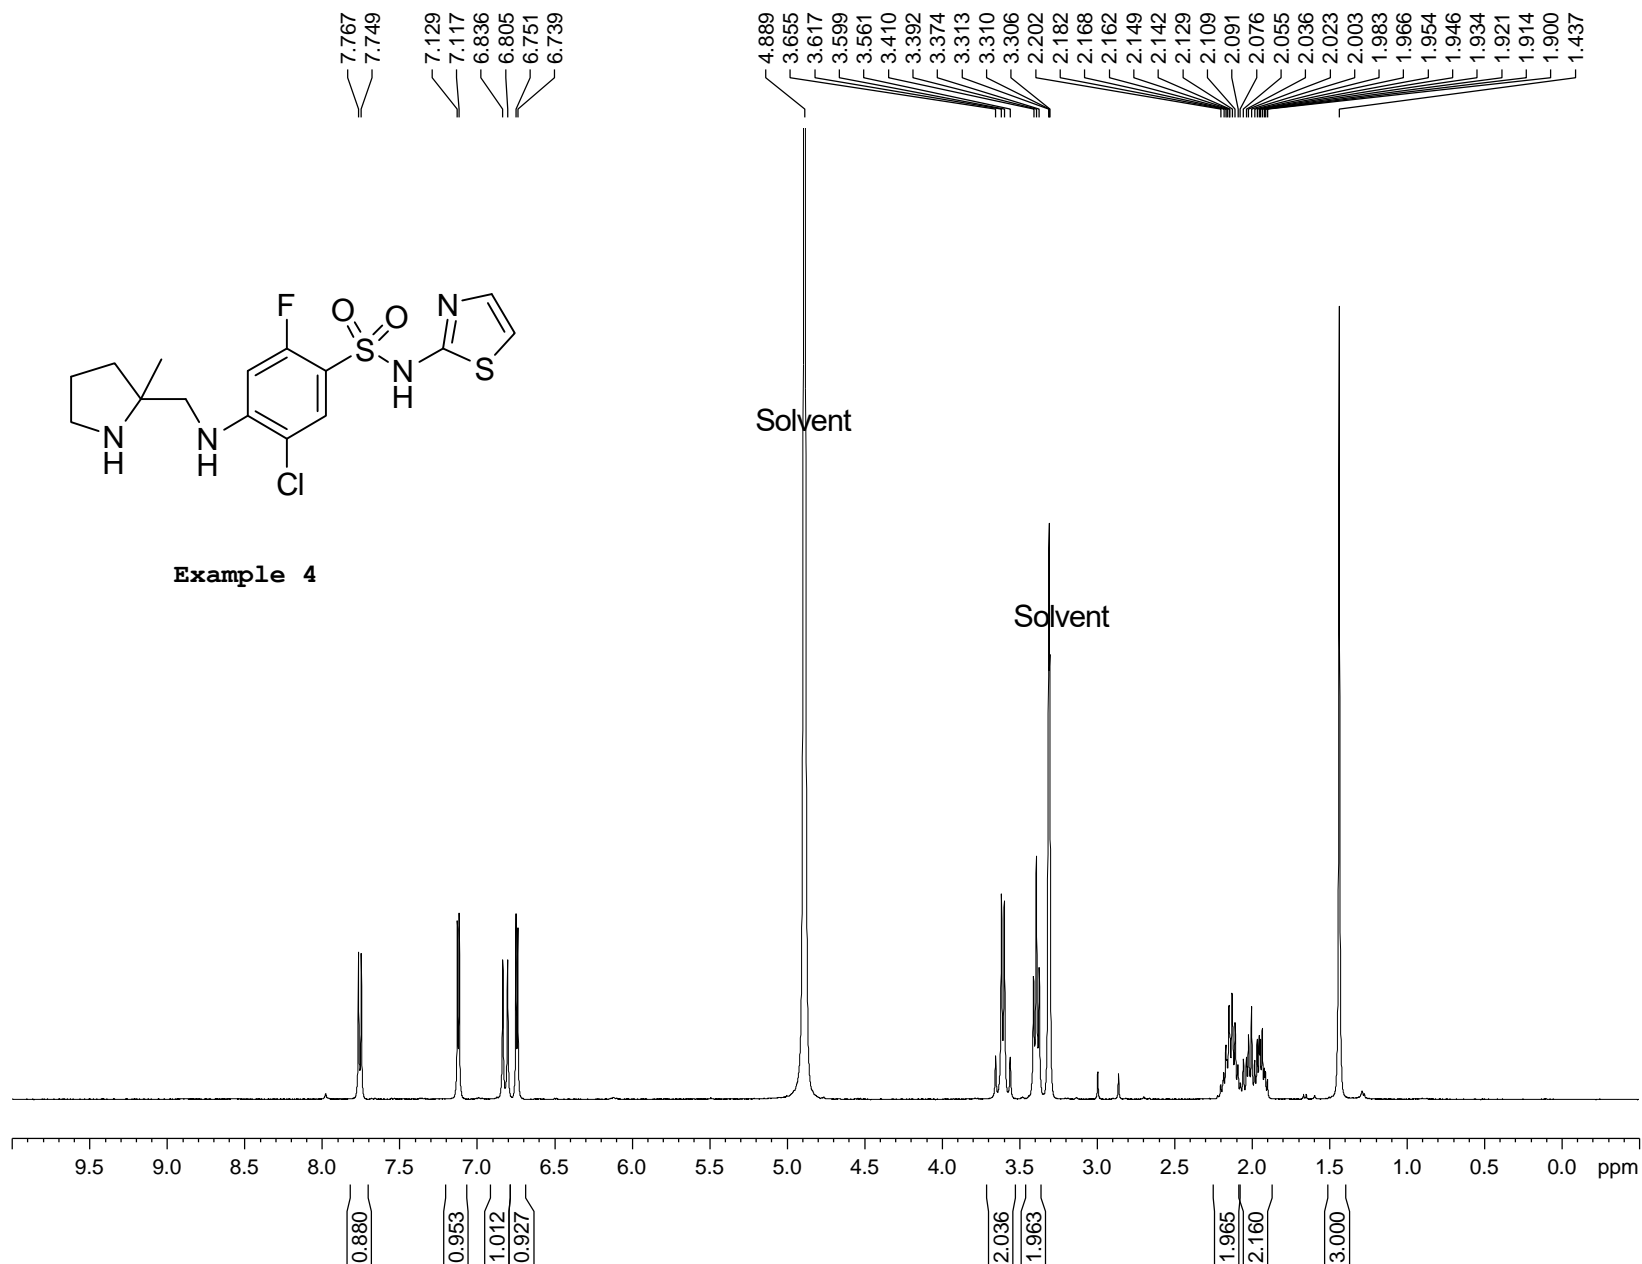

Current Data Parameters  
 NAME h15719-096-1-A  
 EXPNO 1  
 PROCNO 1

F2 - Acquisition Parameters  
 Date\_ 20120828  
 INSTRUM varian  
 PULPROG s2pul  
 TD 26264  
 SOLVENT MeOD  
 NS 8  
 DS 0  
 SWH 6410.256 Hz  
 FIDRES 0.244070 Hz  
 AQ 2.0486419 sec  
 RG 4  
 DW 78.000 usec  
 DE 115.71 usec  
 TE 353.0 K  
 D1 2.0000000 sec  
 TD0 1

===== CHANNEL f1 =====  
 NUC1 1H  
 P1 7.80 usec  
 PL1 120.00 dB  
 SFO1 399.8853041 MHz

F2 - Processing parameters  
 SI 32768  
 SF 399.8828960 MHz  
 WDW EM  
 SSB 0  
 LB 0.30 Hz  
 GB 0  
 PC 1.00

Operator:

Date:

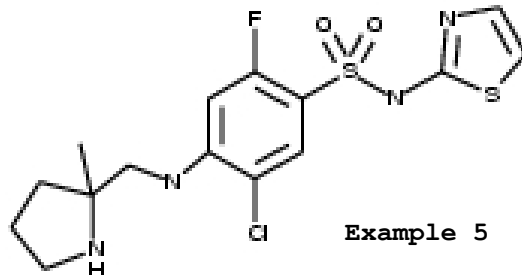

```

=====
Injection Date   : Mon, 27. Aug. 2012
Acq Operator    : AL260
Location        : P1-E-07
Inj. Vol.       : 5.0 ul
Acq Method      : C:\CHEM32\1\METHODS\WUXIAB01-G.M
Data Filename    : K:\120827ZG\ZGHR1EG1.D
LC-MS
    
```

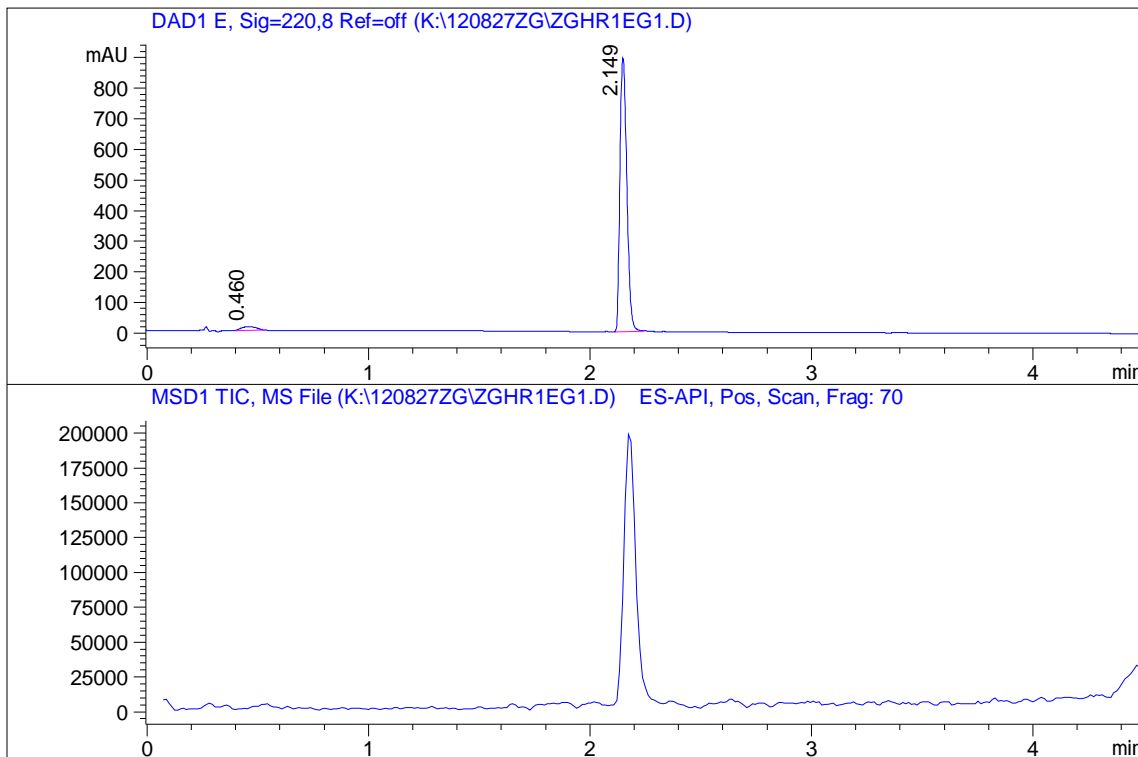

Report

```

=====
Signal 1 : DAD1 E, Sig=220,8 Ref=off
Peak      RT      Area    Height  Height %  Width  Area %
#         [min]
-----
1         0.460   55.868   11.554   1.276     0.081   2.808
2         2.149  1934.002  893.912  98.724     0.035  97.192
-----
    
```

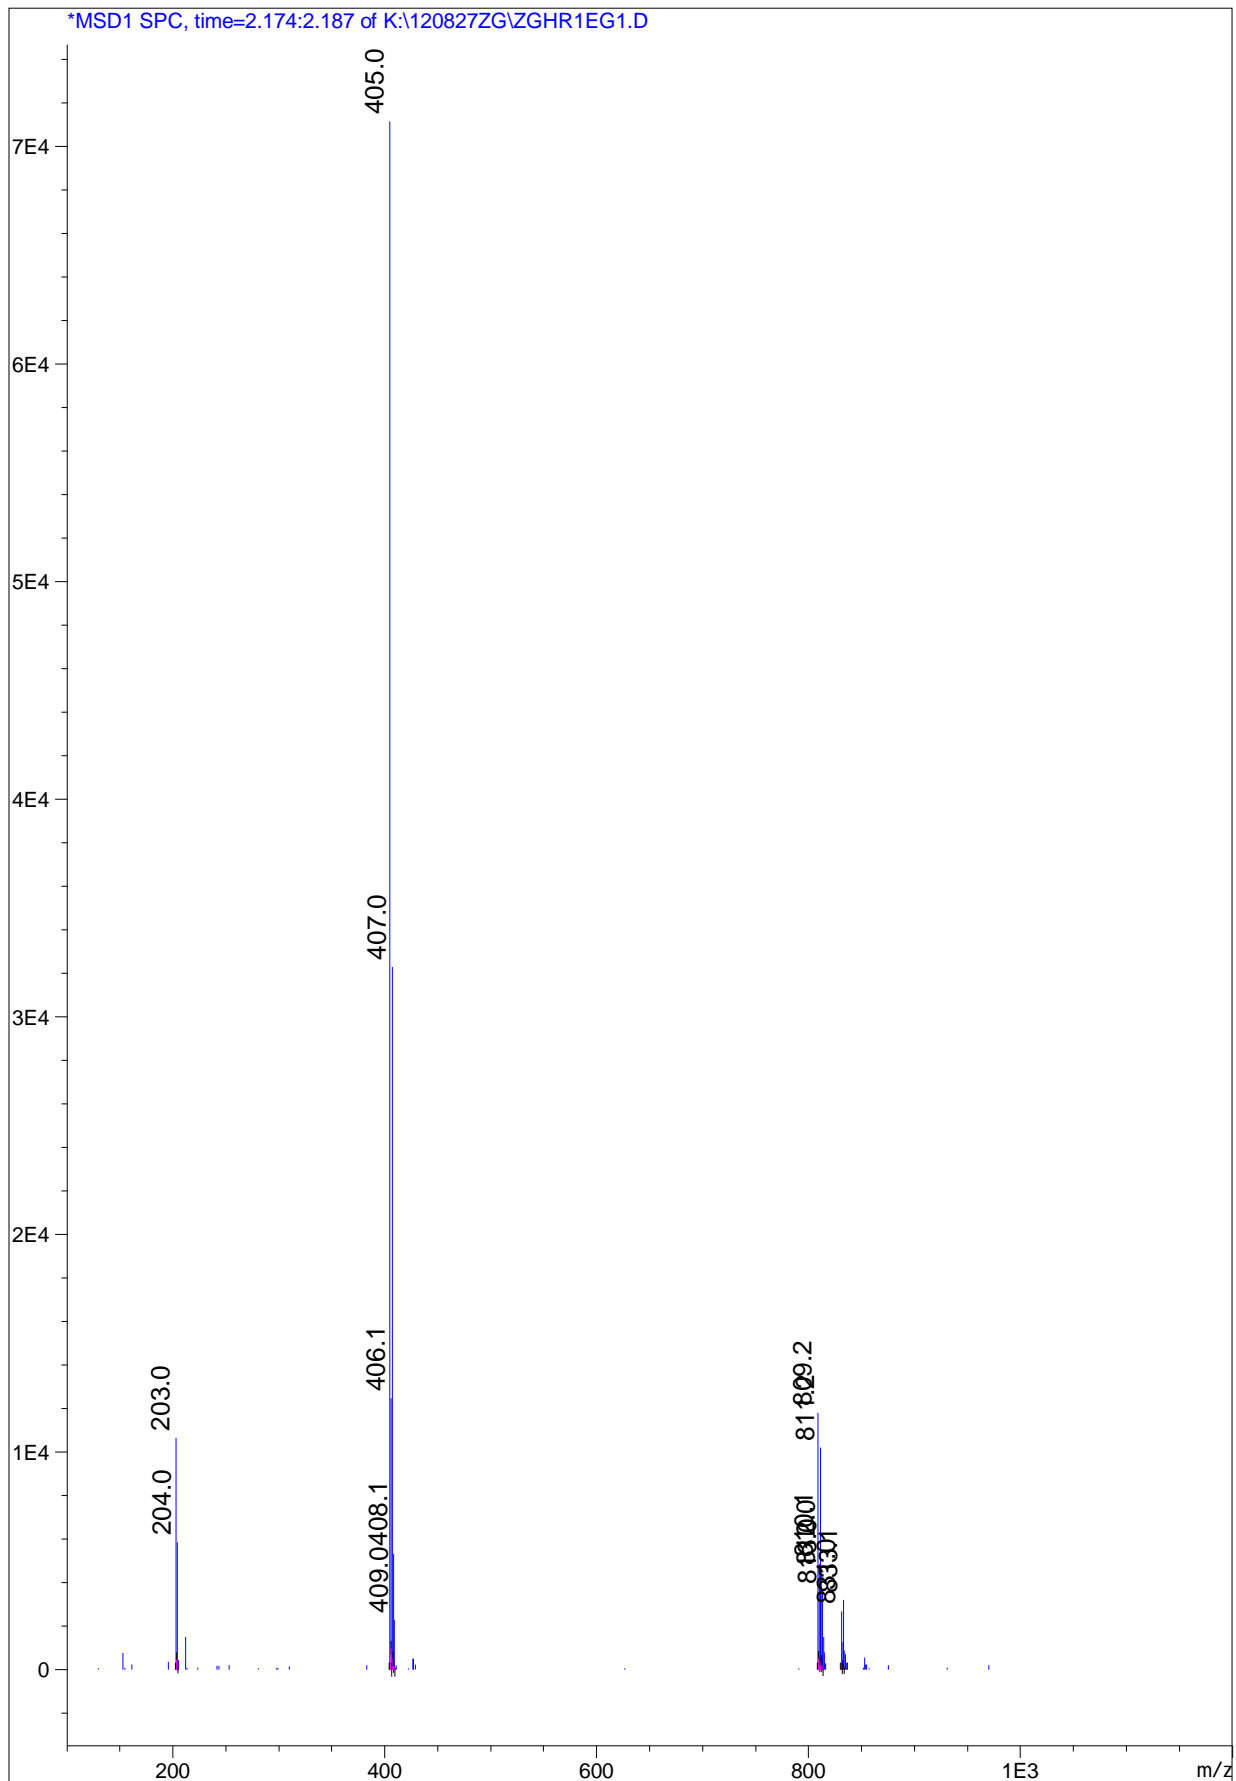

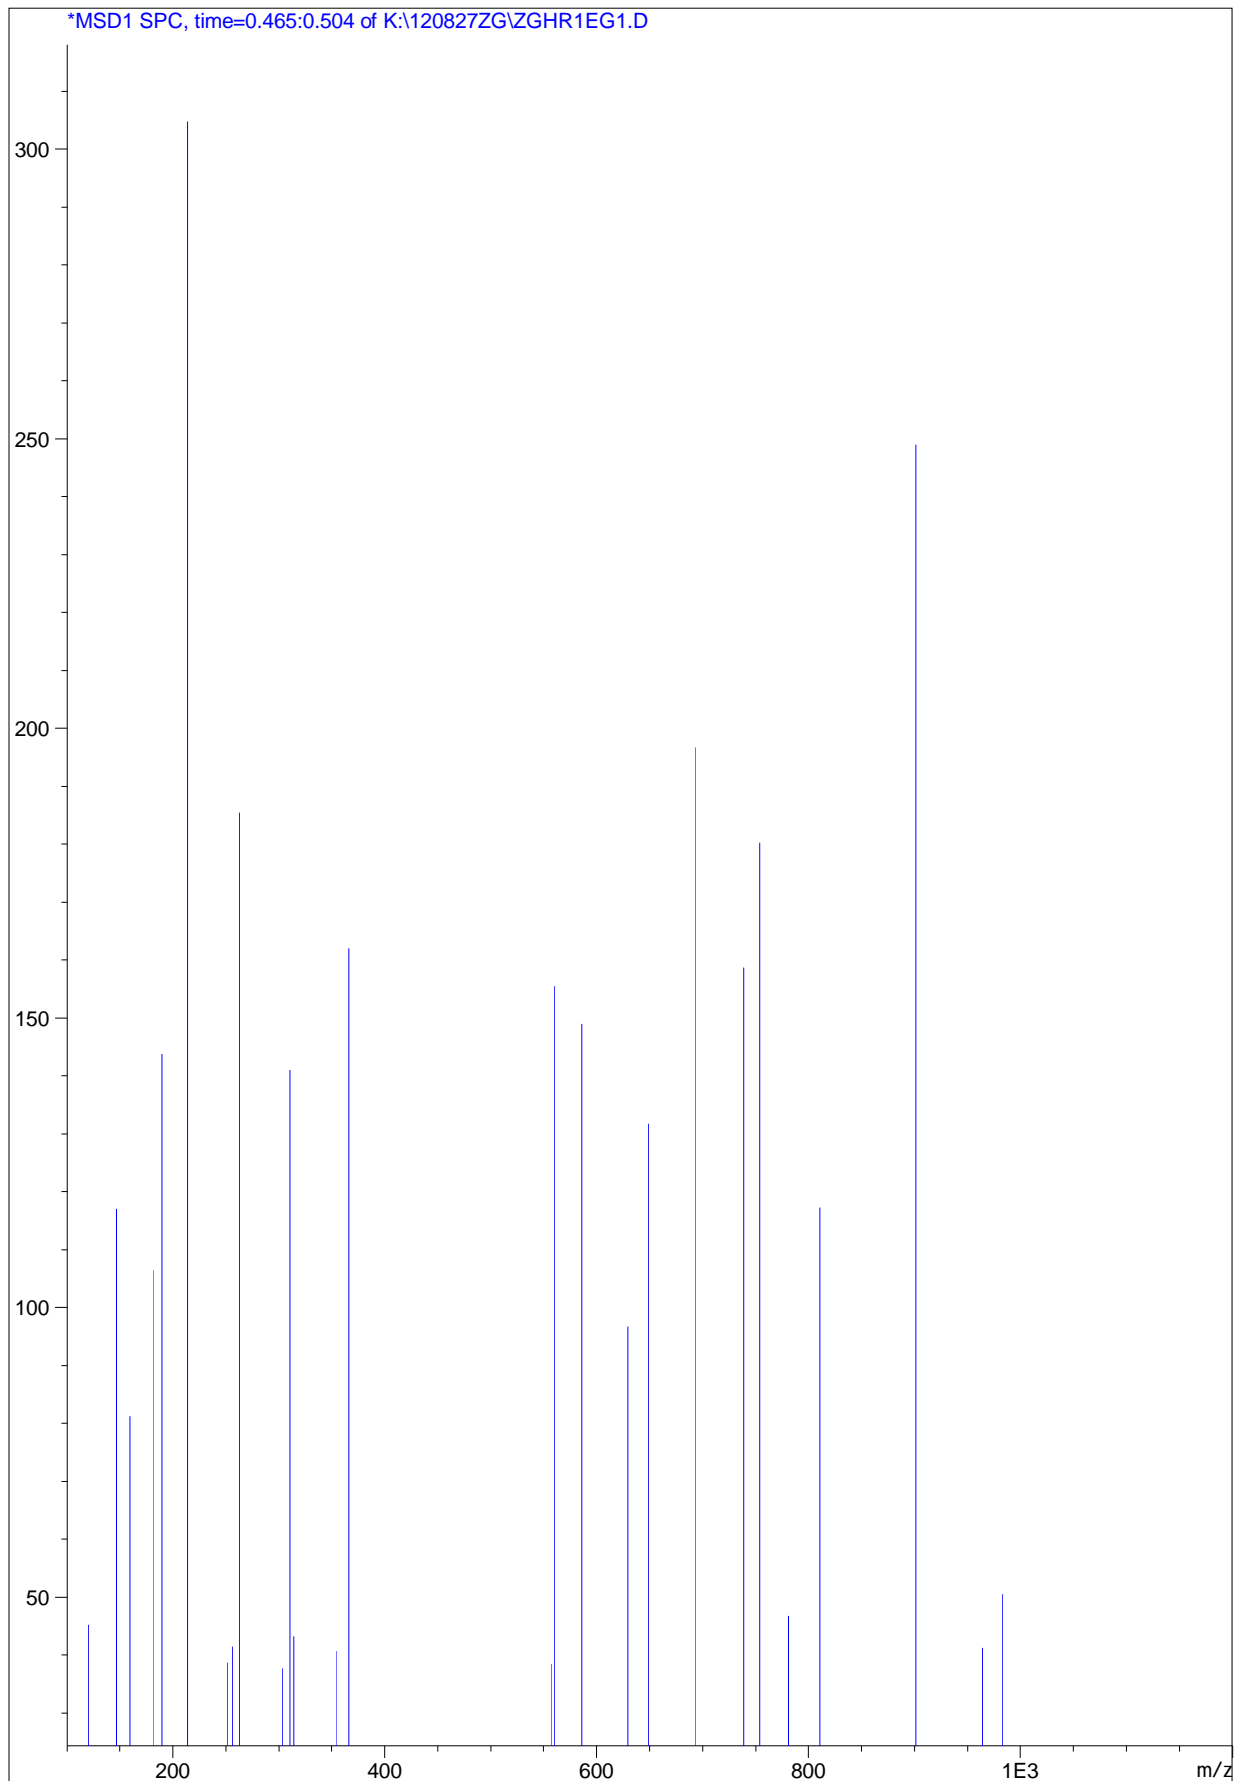

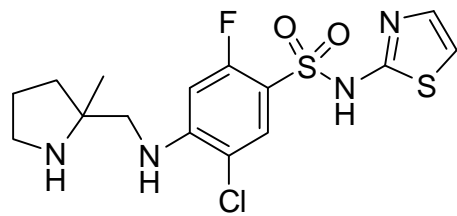

Example 5

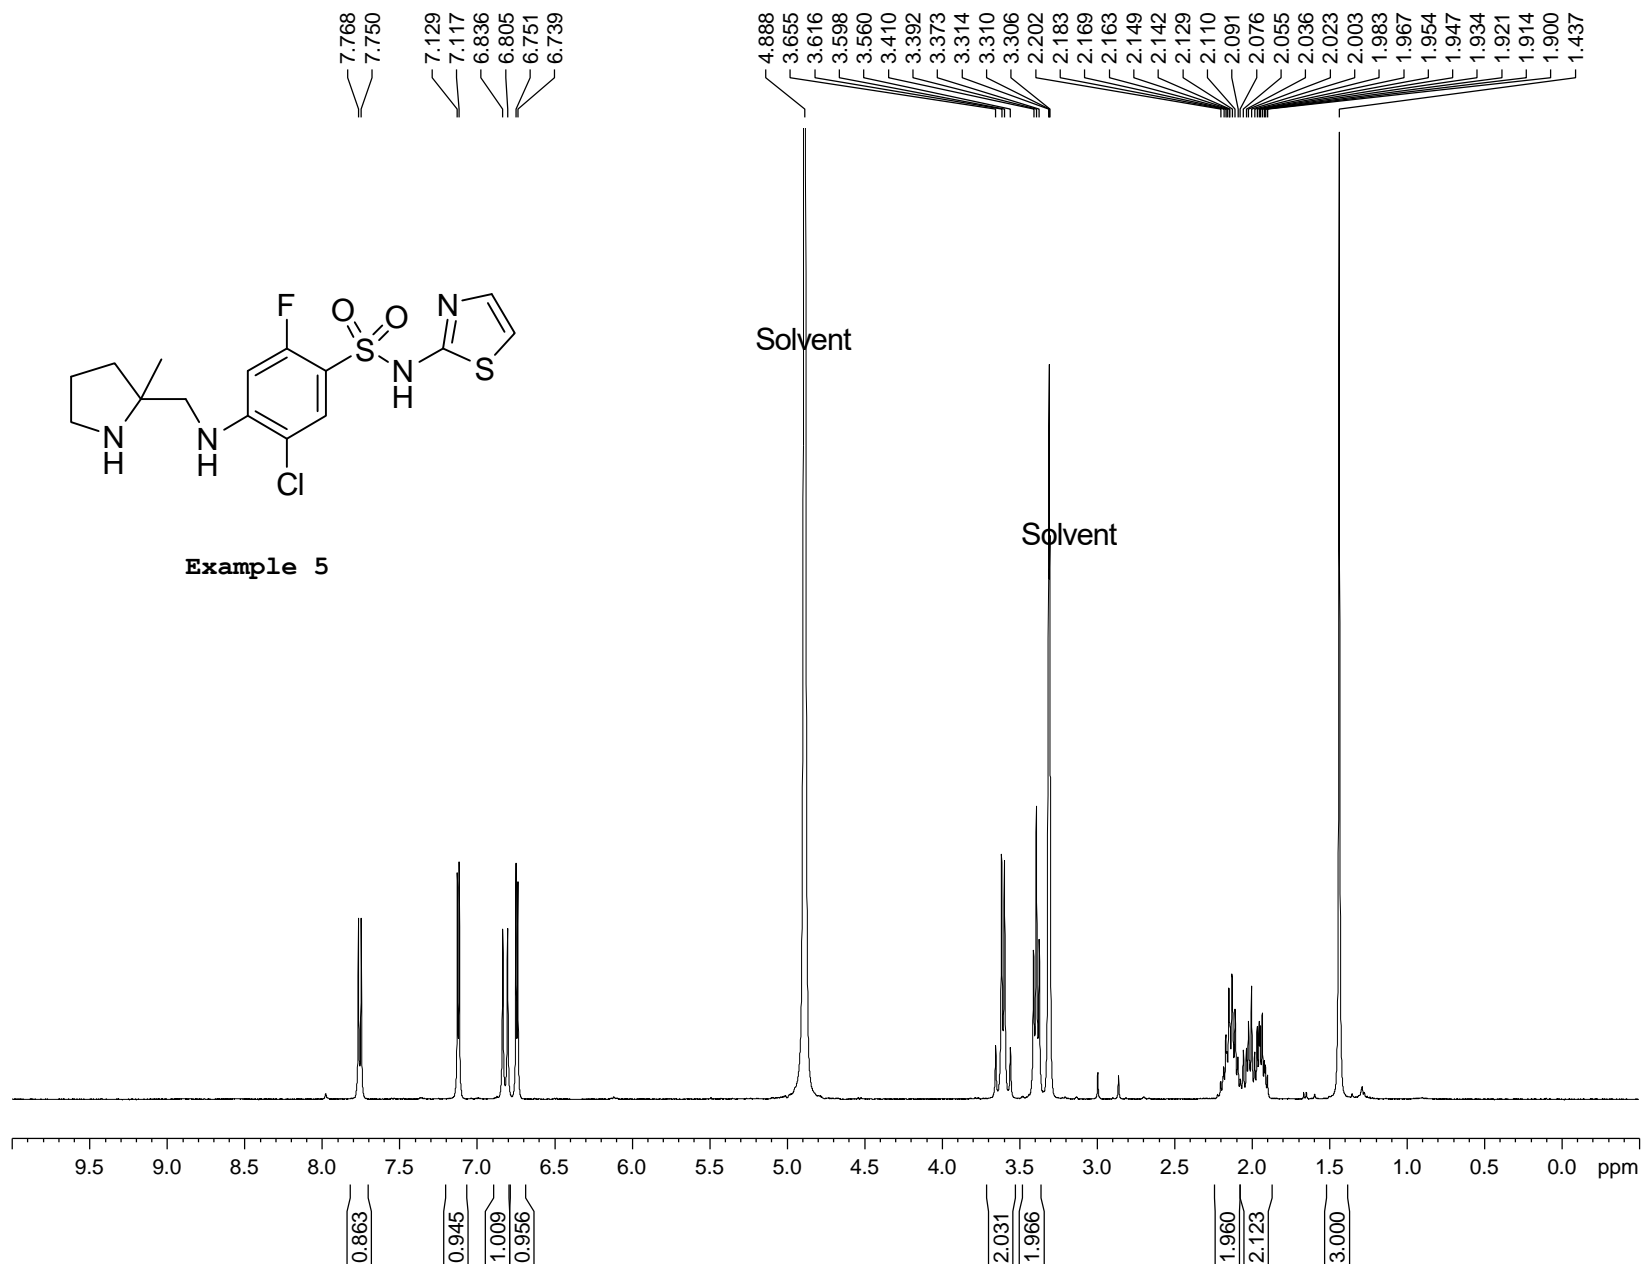

Current Data Parameters  
 NAME h15719-096-1-B  
 EXPNO 1  
 PROCNO 1

F2 - Acquisition Parameters  
 Date\_ 20120828  
 INSTRUM varian  
 PULPROG s2pul  
 TD 26264  
 SOLVENT MeOD  
 NS 8  
 DS 0  
 SWH 6410.256 Hz  
 FIDRES 0.244070 Hz  
 AQ 2.0486419 sec  
 RG 4  
 DW 78.000 usec  
 DE 115.71 usec  
 TE 353.0 K  
 D1 2.00000000 sec  
 TD0 1

===== CHANNEL f1 =====  
 NUC1 1H  
 P1 7.80 usec  
 PL1 120.00 dB  
 SFO1 399.8853041 MHz

F2 - Processing parameters  
 SI 32768  
 SF 399.8828960 MHz  
 WDW EM  
 SSB 0  
 LB 0.30 Hz  
 GB 0  
 PC 1.00

Operator:

Date:



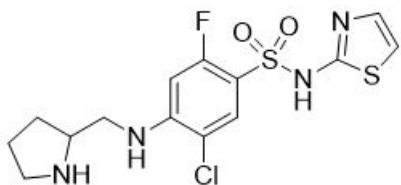

### Example 6 NMR

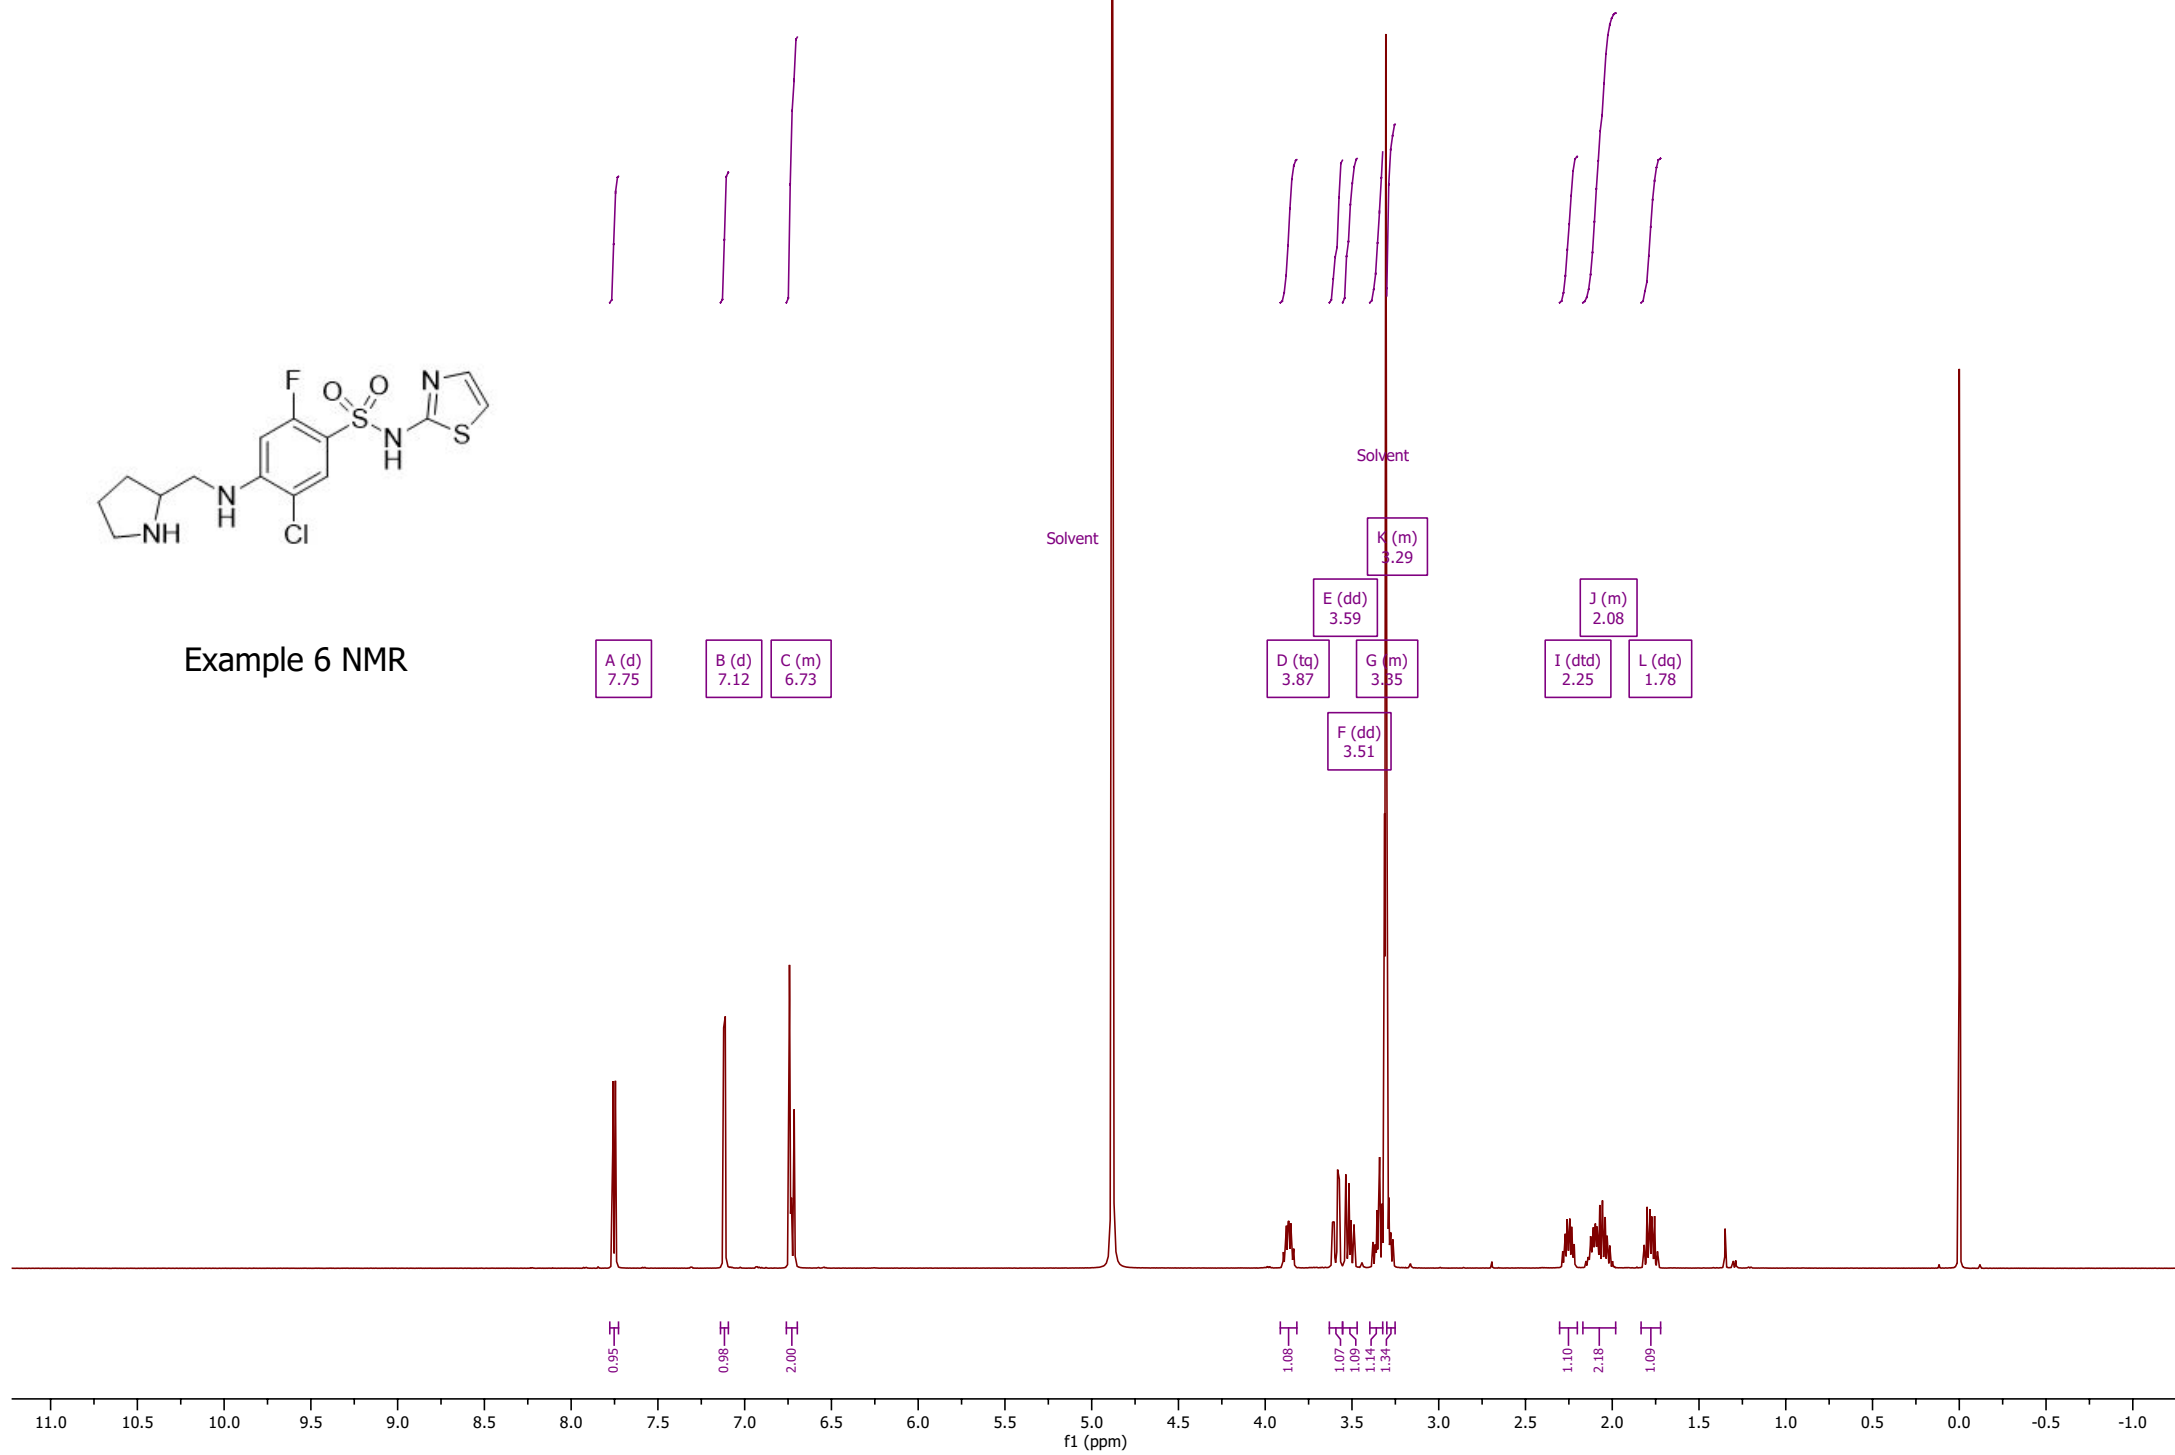

Sample: 1  
File:L-871 15h23m01s 15h23m41s  
Description:

Vial:1:12  
Date:09-Nov-2020

ID:L-871 15h23m01s  
Time:15:33:24

Printed: Mon Dec 21 16:11:59 2020

Sample Report:

Sample 1 Vial 1:12 ID L-871 15h23m01s File L-871 15h23m01s 15h23m41s Date 09-Nov-2020 Time 15:33:24 Description

1: MS ES+ :TIC Smooth (SG, 2x2) (1) 92% 0.63 4.2e+007

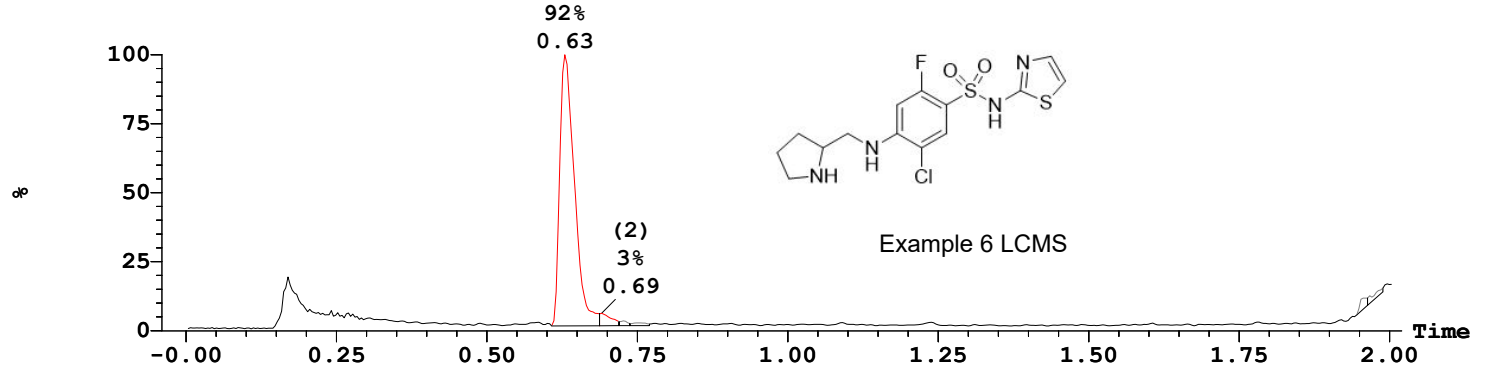

| Peak Number | Compound | Time | AreaAbs | Area %Total | Width | Height | Mass Found |
|-------------|----------|------|---------|-------------|-------|--------|------------|
| 1           |          | 0.63 | 1e+006  | 91.79       | 0     | 4e+007 | Not Found  |
| 2           |          | 0.69 | 4e+004  | 3.29        | 0     | 2e+006 | Not Found  |
| 3           |          | 0.73 | 1e+004  | 0.81        | 0     | 7e+005 |            |
| 4           |          | 0.75 | 1e+004  | 0.89        | 0     | 4e+005 |            |
| 10          |          | 1.96 | 2e+004  | 1.69        | 0     | 2e+006 |            |
| 11          |          | 1.99 | 2e+004  | 1.53        | 0     | 6e+005 |            |

2: UV Detector: TAC :Wavelength Range: (215 - 215) Smooth (SG, 2x2) 3.228  
Range: 3.242

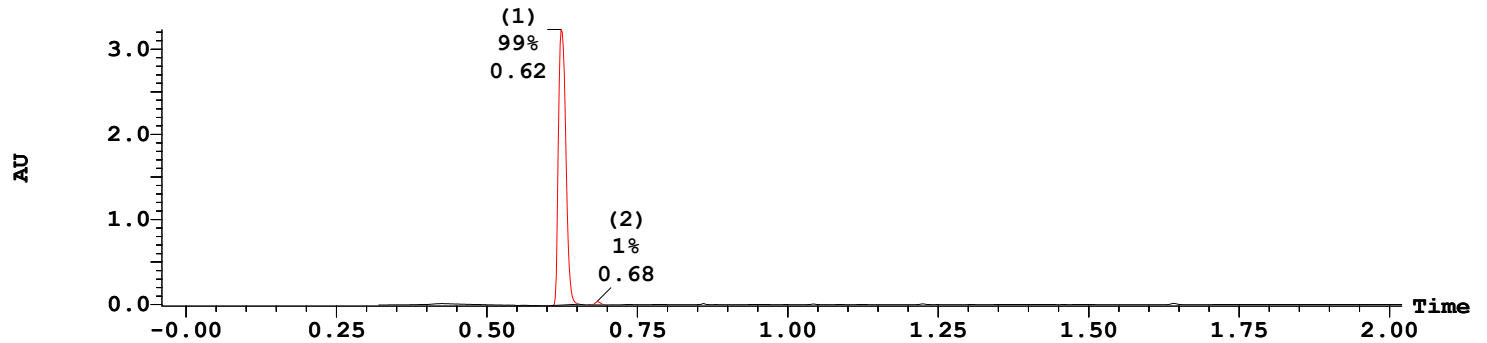

| Peak Number | Compound | Time | AreaAbs | Area %Total | Width | Height | Mass Found |
|-------------|----------|------|---------|-------------|-------|--------|------------|
| 1           |          | 0.62 | 5e+004  | 99.14       | 0     | 3e+006 | Not Found  |
| 2           |          | 0.68 | 4e+002  | 0.86        | 0     | 4e+004 | Not Found  |

(2) ELSD Signal Smooth (SG, 2x2) (1) 91% 0.62 84.936  
Range: 85.405

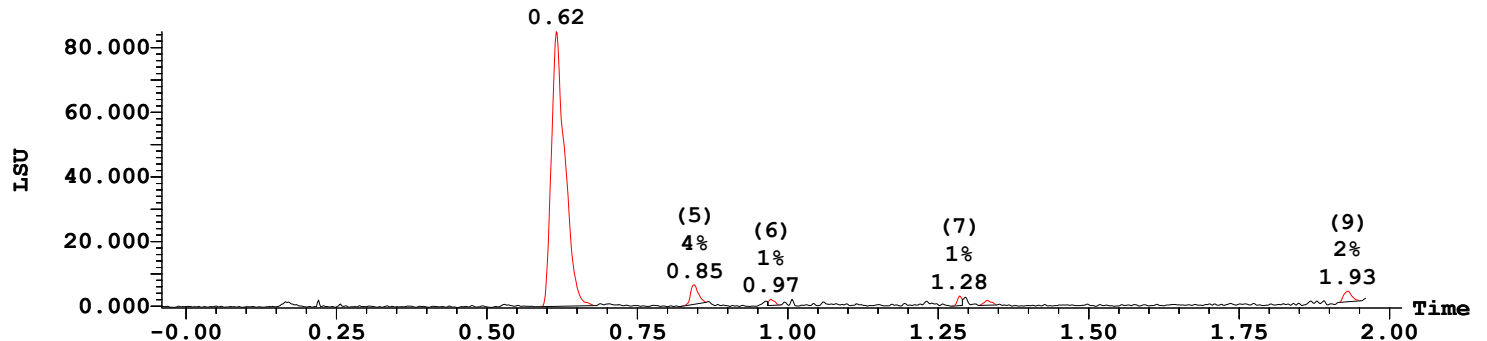

| Peak Number | Compound | Time | AreaAbs | Area %Total | Width | Height | Mass Found |
|-------------|----------|------|---------|-------------|-------|--------|------------|
| 1           |          | 0.62 | 80.000  | 91%         | 0     | 84.936 |            |
| 5           |          | 0.85 | ~10000  | 4%          | 0     | ~10000 |            |
| 6           |          | 0.97 | ~10000  | 1%          | 0     | ~10000 |            |
| 7           |          | 1.28 | ~10000  | 1%          | 0     | ~10000 |            |
| 9           |          | 1.93 | ~10000  | 2%          | 0     | ~10000 |            |

Sample: 1  
File:L-871 15h23m01s 15h23m41s  
Description:

Vial:1:12  
Date:09-Nov-2020

ID:L-871 15h23m01s  
Time:15:33:24

Printed: Mon Dec 21 16:11:59 2020

Sample Report (continued):

| Peak Number | Compound | Time | AreaAbs | Area %Total | Width | Height | Mass Found |
|-------------|----------|------|---------|-------------|-------|--------|------------|
| 1           |          | 0.62 | 2e+003  | 91.38       | 0     | 8e+004 | Not Found  |
| 5           |          | 0.85 | 9e+001  | 3.72        | 0     | 6e+003 | Not Found  |
| 6           |          | 0.97 | 2e+001  | 0.87        | 0     | 2e+003 | Not Found  |
| 7           |          | 1.28 | 2e+001  | 0.99        | 0     | 3e+003 | Not Found  |
| 8           |          | 1.33 | 2e+001  | 0.88        | 0     | 1e+003 | Not Found  |
| 9           |          | 1.93 | 5e+001  | 2.16        | 0     | 3e+003 | Not Found  |

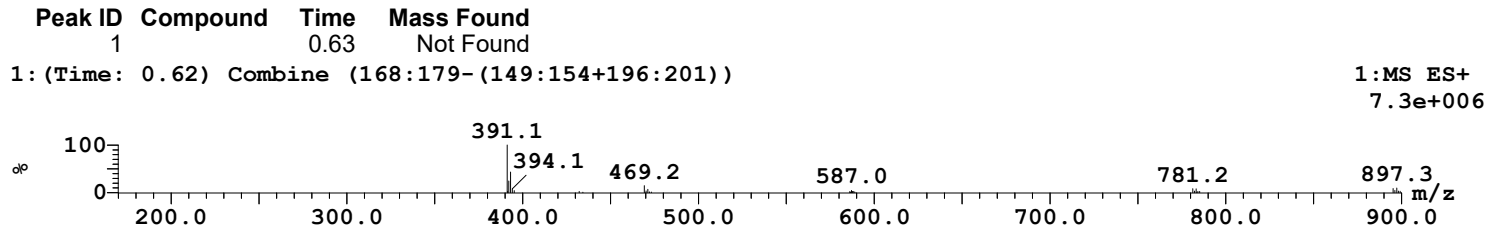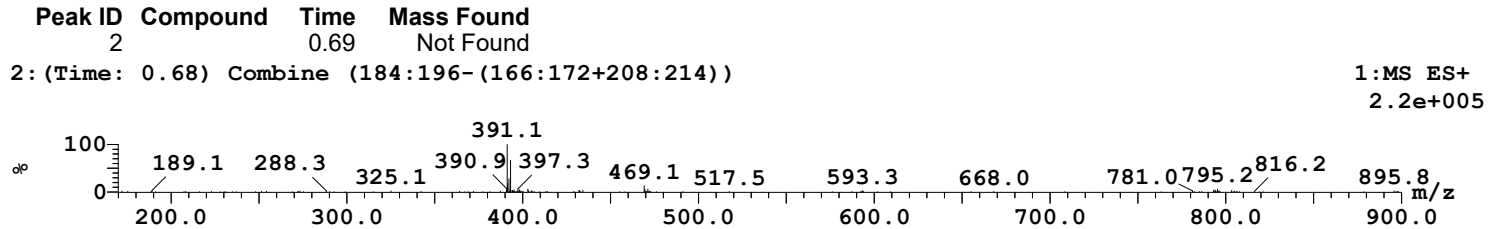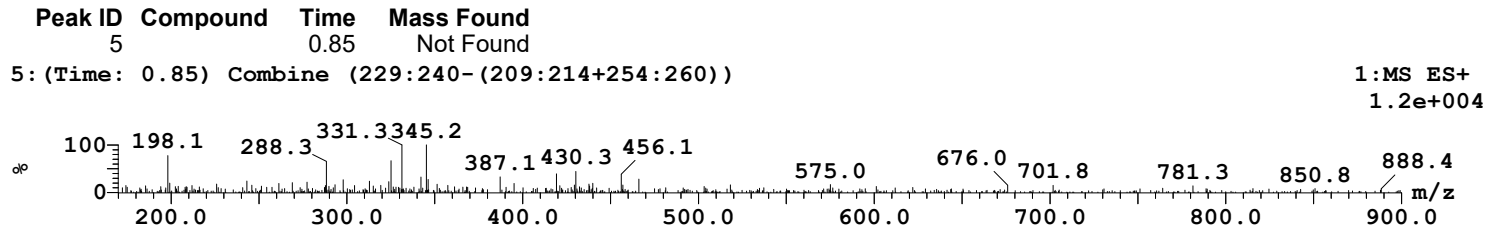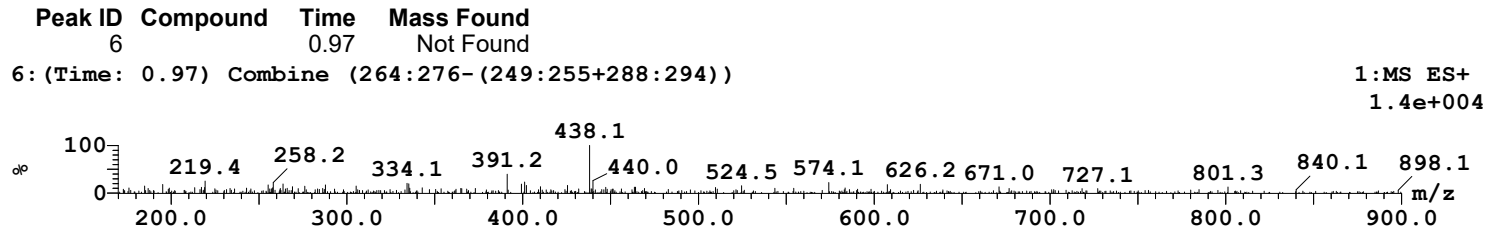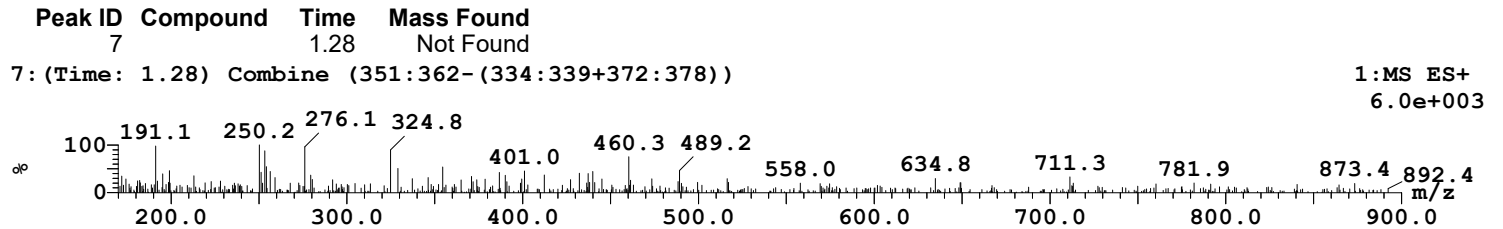

Sample: 1  
File:L-871 15h23m01s 15h23m41s  
Description:

Vial:1:12  
Date:09-Nov-2020

ID:L-871 15h23m01s  
Time:15:33:24

Printed: Mon Dec 21 16:11:59 2020

Sample Report (continued):

| Peak ID | Compound | Time | Mass Found |
|---------|----------|------|------------|
| 8       |          | 1.33 | Not Found  |

8: (Time: 1.33) Combine (364:375- (347:352+388:393)) 1:MS ES+  
8.4e+003

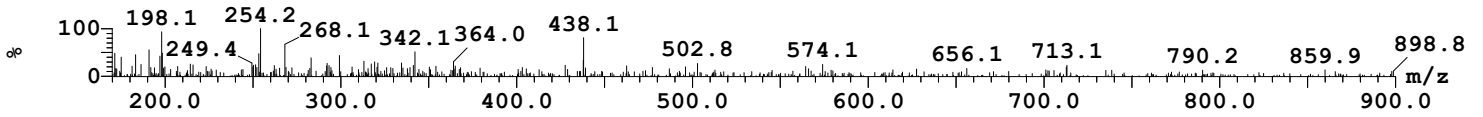

| Peak ID | Compound | Time | Mass Found |
|---------|----------|------|------------|
| 9       |          | 1.93 | Not Found  |

9: (Time: 1.93) Combine (530:541- (513:518+556)) 1:MS ES+  
1.1e+005

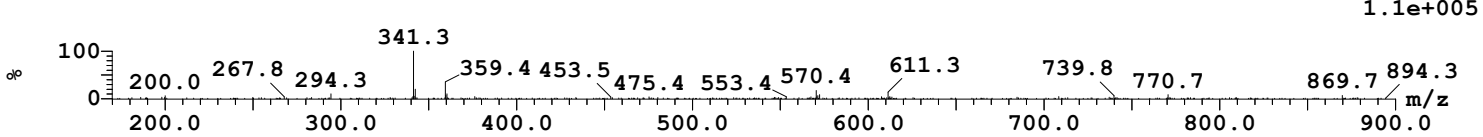

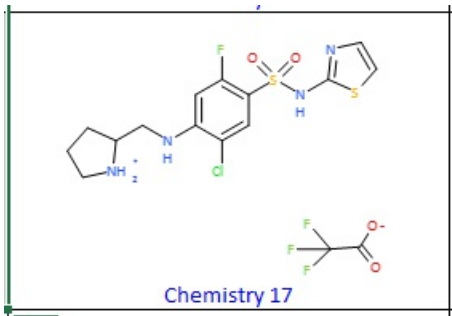

Example 7 NMR

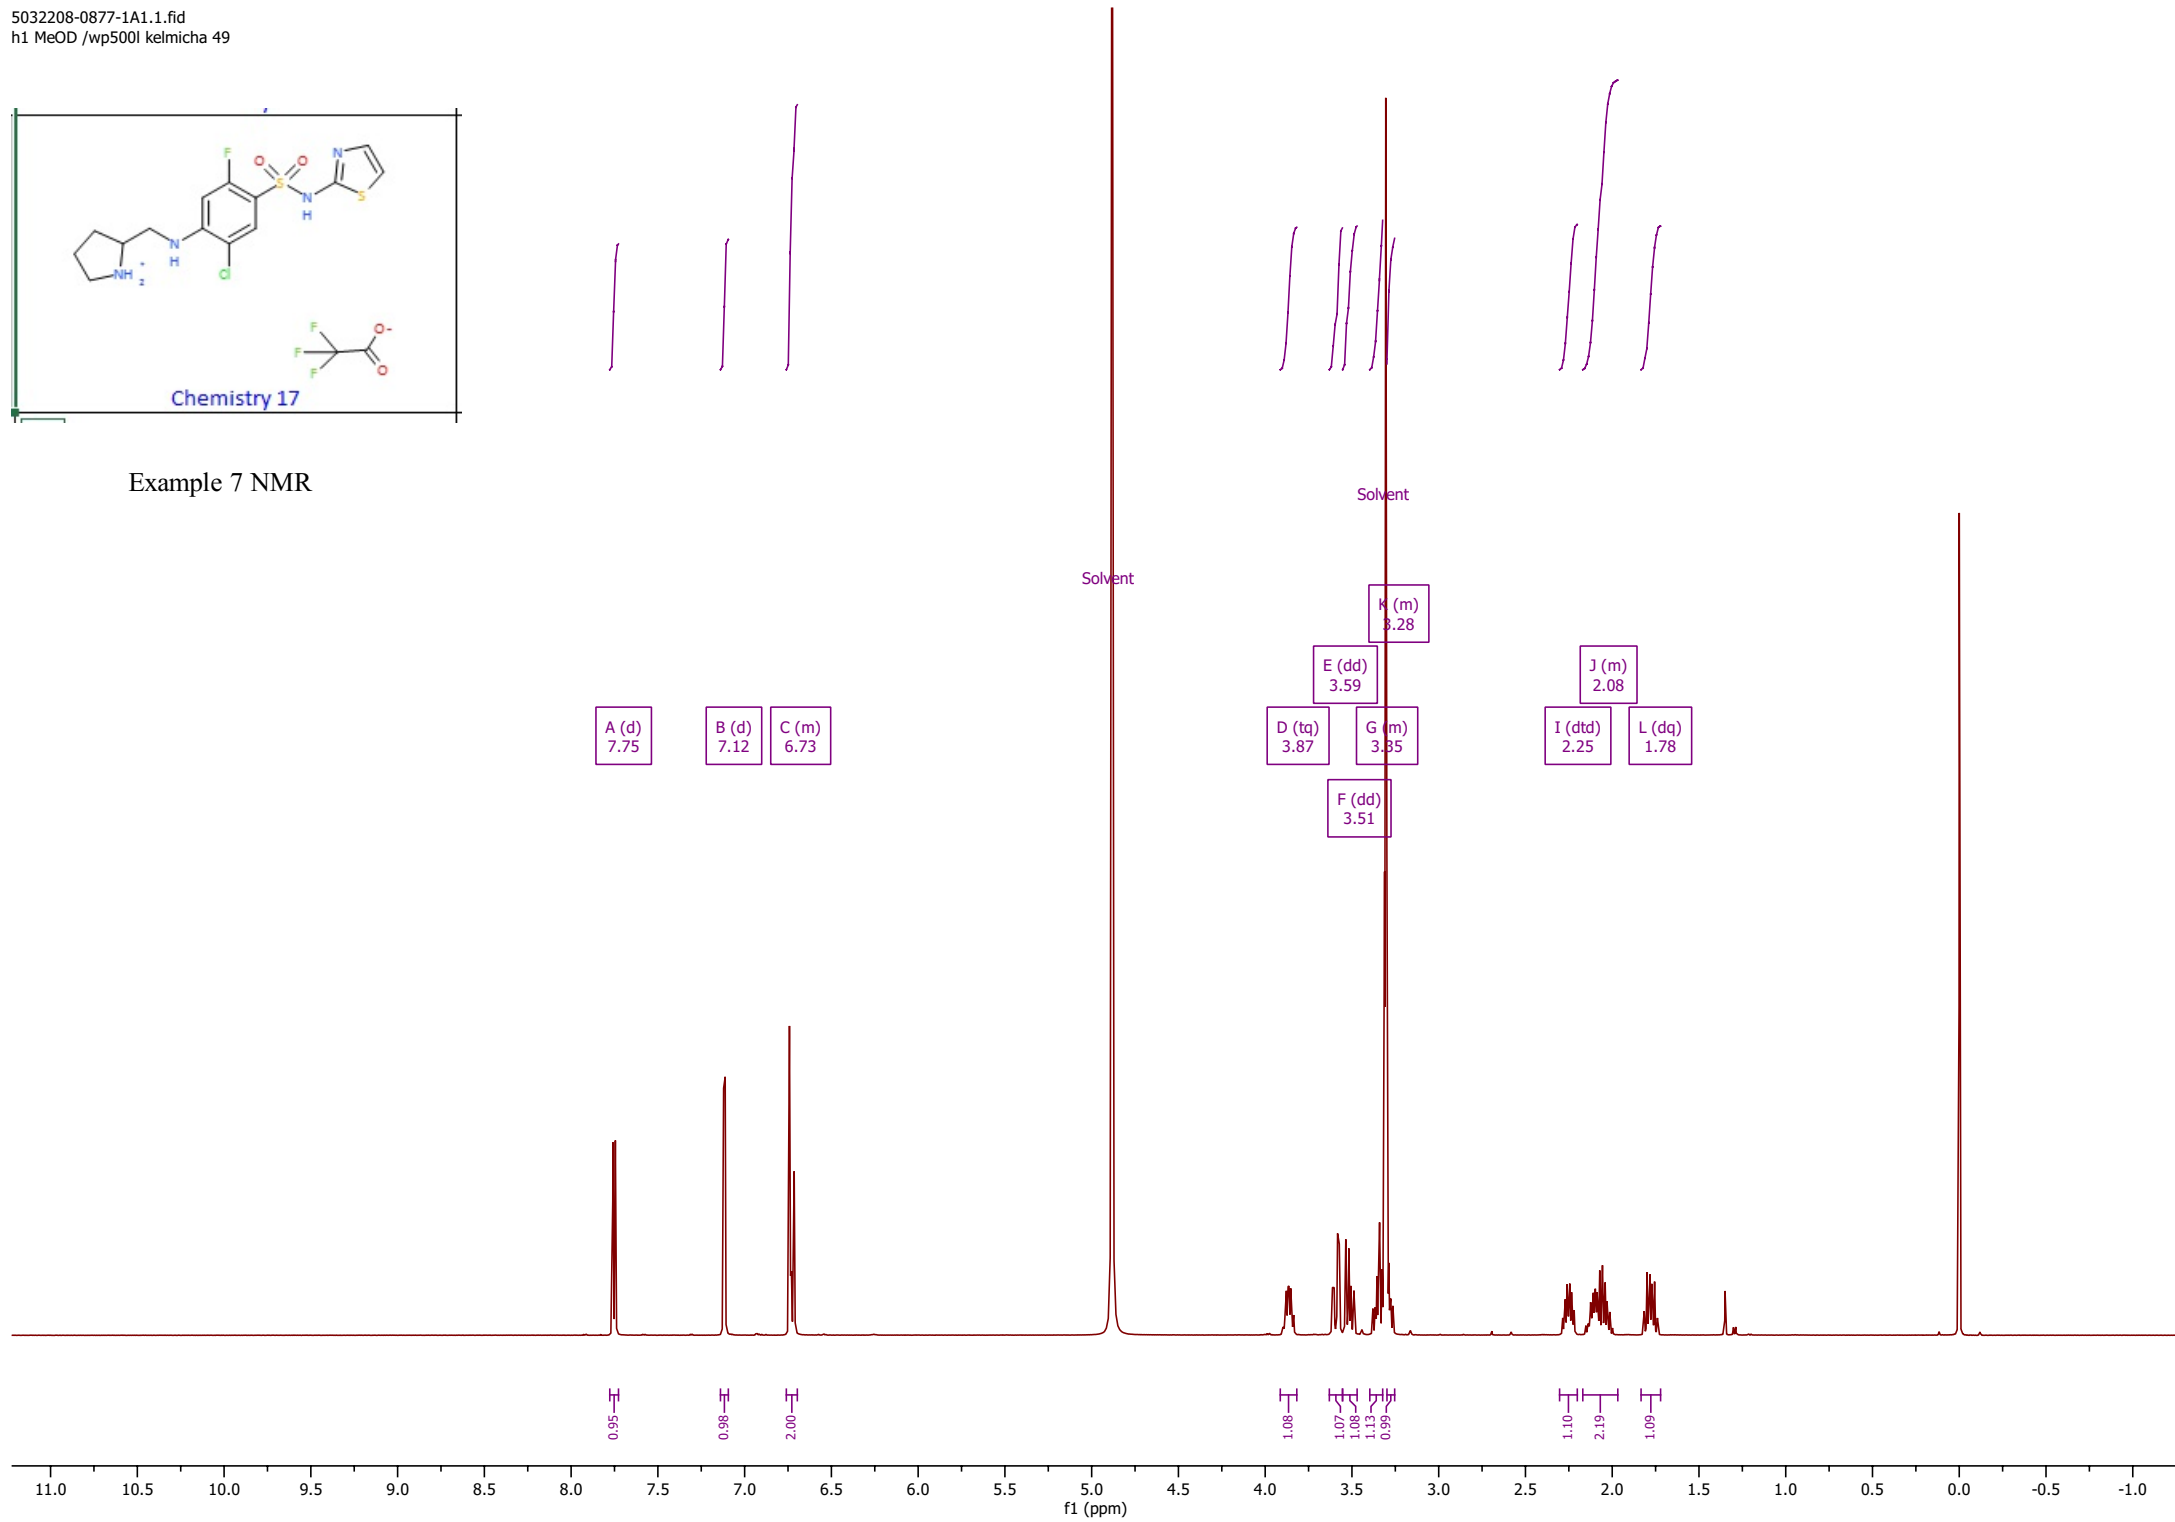

Sample: 1  
 File:L-877 15h23m01s 15h23m41s  
 Description:

Vial:1:10  
 Date:09-Nov-2020

ID:L-877 15h23m01s  
 Time:15:25:14

Printed: Mon Dec 21 16:13:53 2020

Sample Report:

Sample 1 Vial 1:10 ID L-877 15h23m01s File L-877 15h23m01s 15h23m41s Date 09-Nov-2020 Time 15:25:14 Description

1: MS ES+ :TIC Smooth (SG, 2x2)

4.4e+007

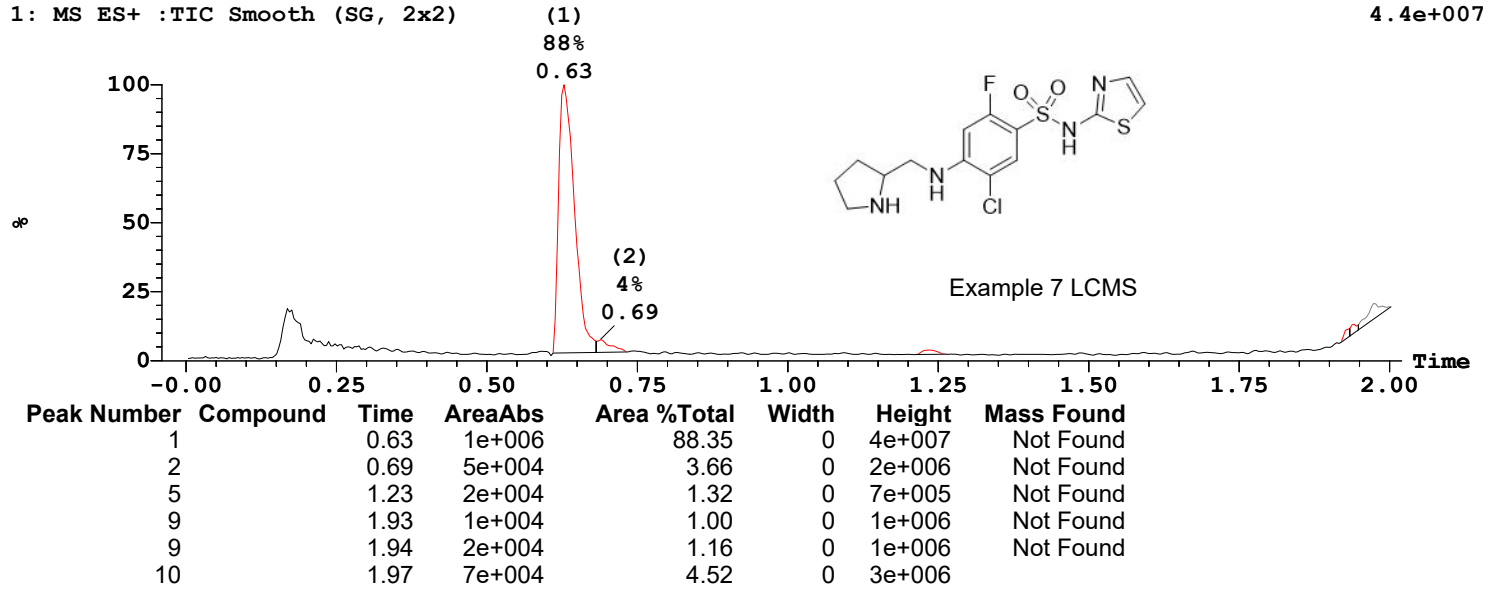

2: UV Detector: TAC :Wavelength Range: (215 - 215) Smooth (SG, 2x2)

3.256

Range: 3.27

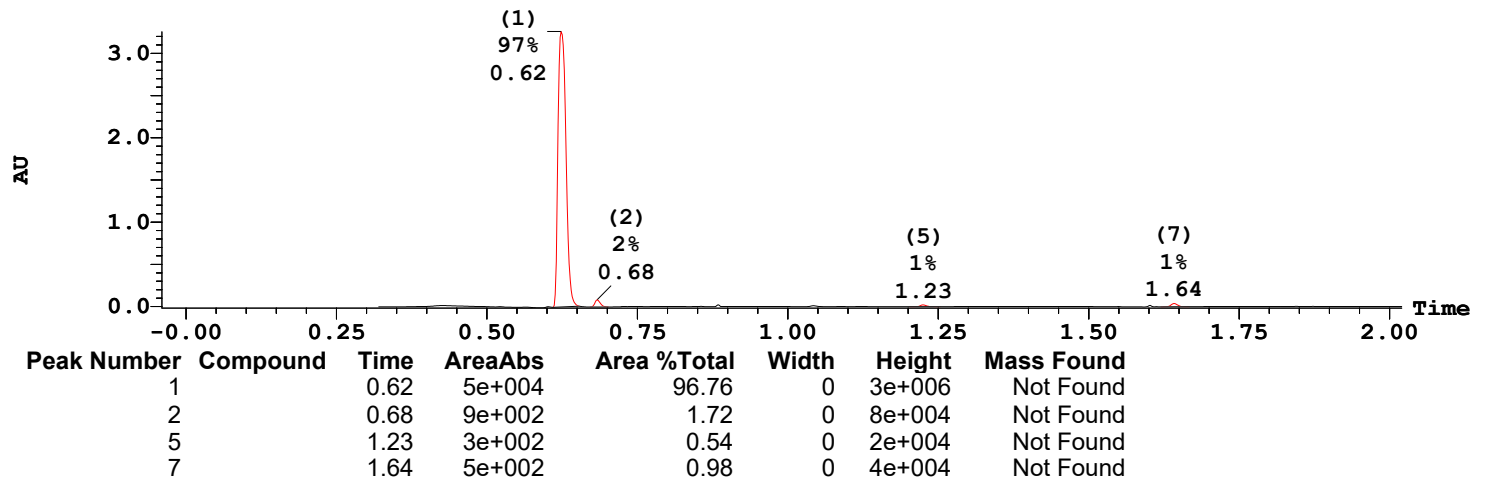

Sample: 1  
File:L-877 15h23m01s 15h23m41s  
Description:

Vial:1:10  
Date:09-Nov-2020

ID:L-877 15h23m01s  
Time:15:25:14

Printed: Mon Dec 21 16:13:53 2020

Sample Report (continued):

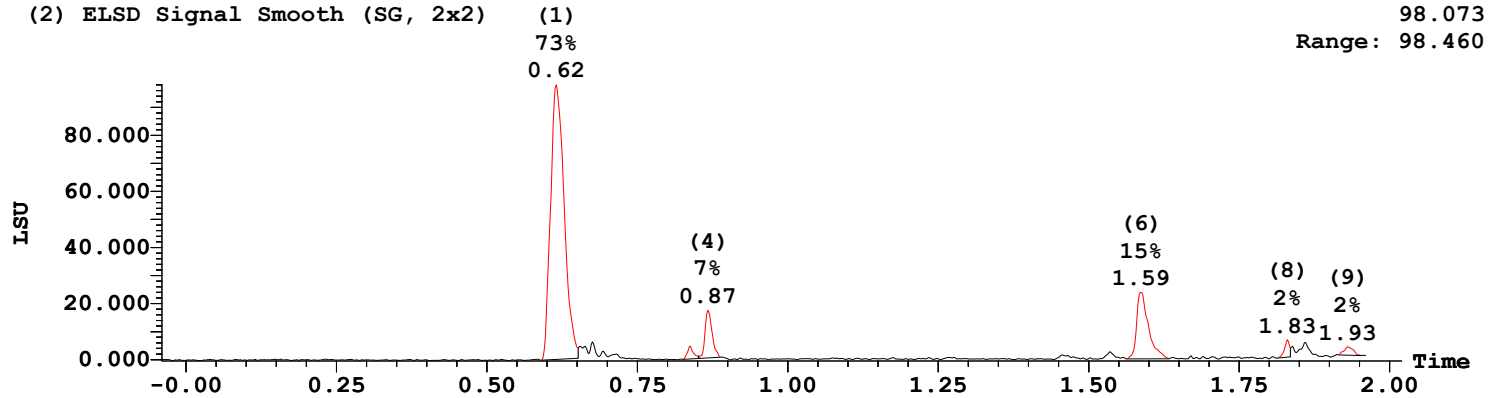

| Peak ID | Compound | Time | Mass Found |
|---------|----------|------|------------|
| 1       |          | 0.63 | Not Found  |

1: (Time: 0.62) Combine (168:179- (150:156+196:202))

1: MS ES+  
7.9e+006

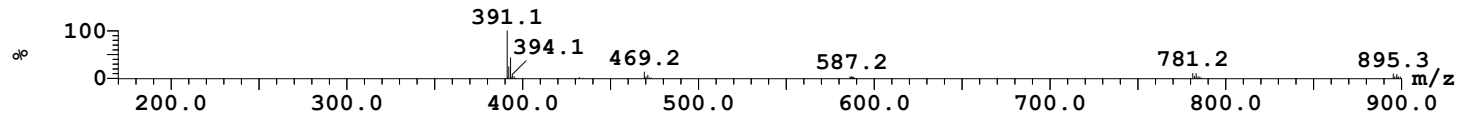

| Peak ID | Compound | Time | Mass Found |
|---------|----------|------|------------|
| 2       |          | 0.69 | Not Found  |

2: (Time: 0.68) Combine (185:196- (168:173+209:215))

1: MS ES+  
5.8e+004

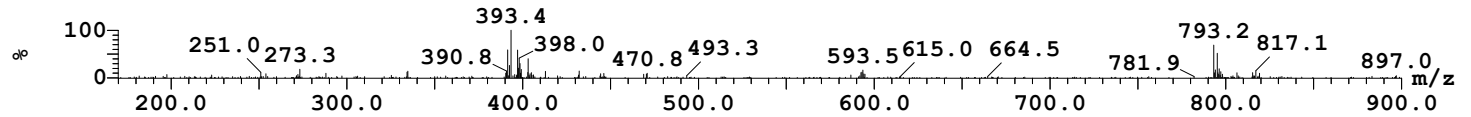

| Peak ID | Compound | Time | Mass Found |
|---------|----------|------|------------|
| 3       |          | 0.84 | Not Found  |

3: (Time: 0.84) Combine (227:239- (210:216+251:257))

1: MS ES+  
1.8e+004

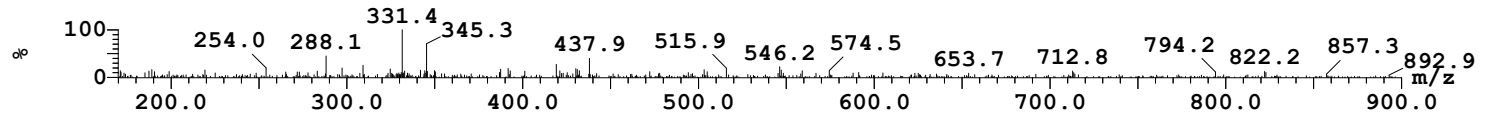

Sample: 1  
File:L-877 15h23m01s 15h23m41s  
Description:

Vial:1:10  
Date:09-Nov-2020

ID:L-877 15h23m01s  
Time:15:25:14

Printed: Mon Dec 21 16:13:53 2020

Sample Report (continued):

| Peak ID | Compound | Time | Mass Found |
|---------|----------|------|------------|
| 4       |          | 0.87 | Not Found  |

4: (Time: 0.87) Combine (236:247-(218:223+261:267)) 1:MS ES+  
6.6e+003

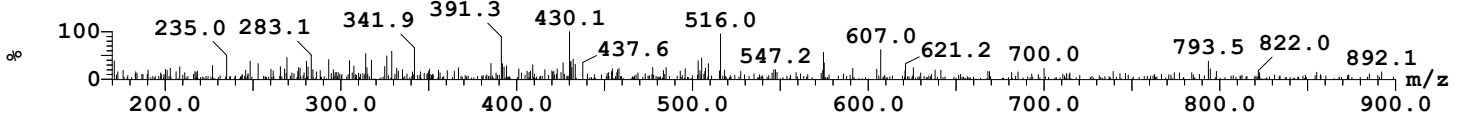

| Peak ID | Compound | Time | Mass Found |
|---------|----------|------|------------|
| 5       |          | 1.23 | Not Found  |

5: (Time: 1.23) Combine (336:347-(315:321+363:369)) 1:MS ES+  
1.0e+005

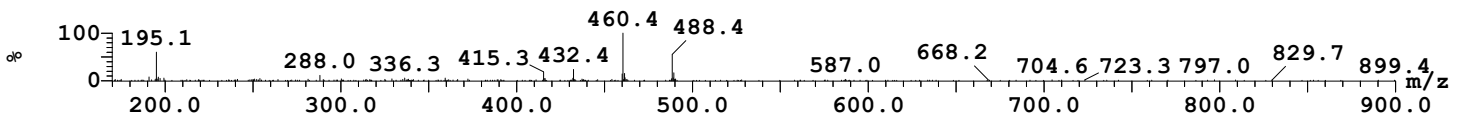

| Peak ID | Compound | Time | Mass Found |
|---------|----------|------|------------|
| 6       |          | 1.59 | Not Found  |

6: (Time: 1.59) Combine (436:447-(416:421+469:474)) 1:MS ES+  
1.4e+004

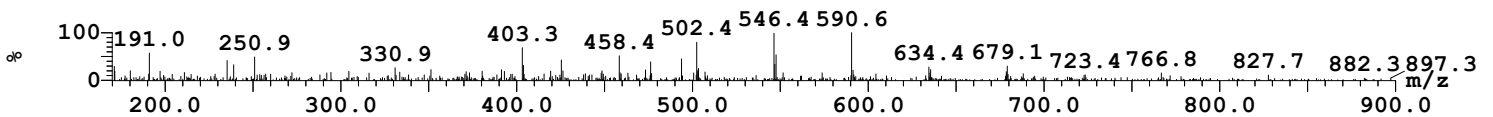

| Peak ID | Compound | Time | Mass Found |
|---------|----------|------|------------|
| 7       |          | 1.64 | Not Found  |

7: (Time: 1.64) Combine (451:463-(432:437+478:483)) 1:MS ES+  
1.3e+004

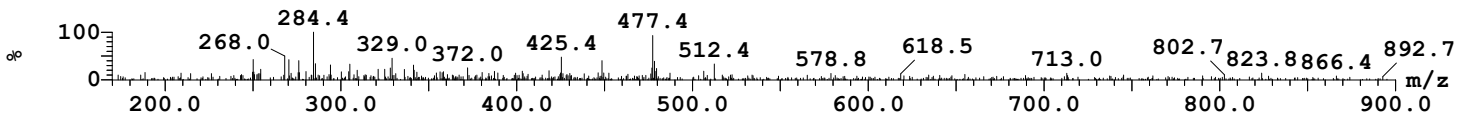

| Peak ID | Compound | Time | Mass Found |
|---------|----------|------|------------|
| 8       |          | 1.83 | Not Found  |

8: (Time: 1.83) Combine (504:515-(485:491+524:530)) 1:MS ES+  
9.4e+003

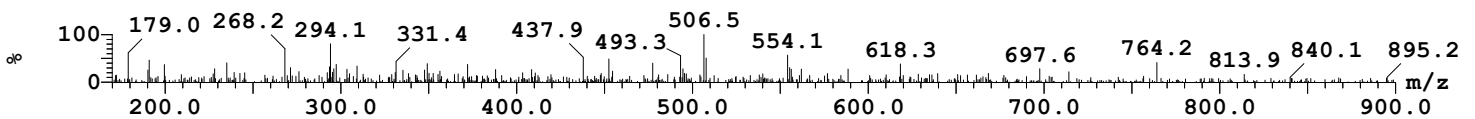

| Peak ID | Compound | Time | Mass Found |
|---------|----------|------|------------|
| 9       |          | 1.93 | Not Found  |

9: (Time: 1.93) Combine (531:543-513:519) 1:MS ES+  
5.7e+005

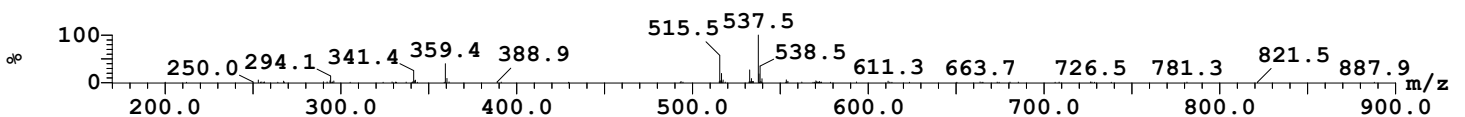



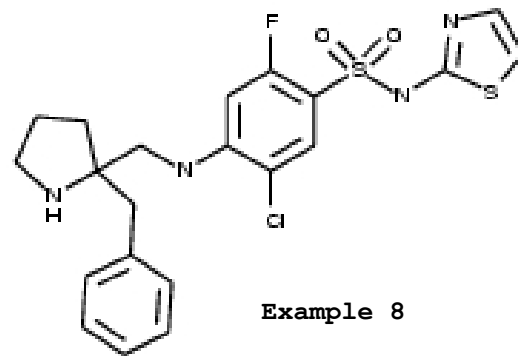

```

=====
Injection Date   : Sat, 8. Jun. 2013
Acq Operator    : AL260
Location        : P1-A-04
Inj. Vol.       : 4.0 ul
Acq Method      : C:\CHEM32\1\METHODS\WUXIAB1(
Data Filename    : D:\DATA\130608AKG\AKGF81AD1.
LC-MS
    
```

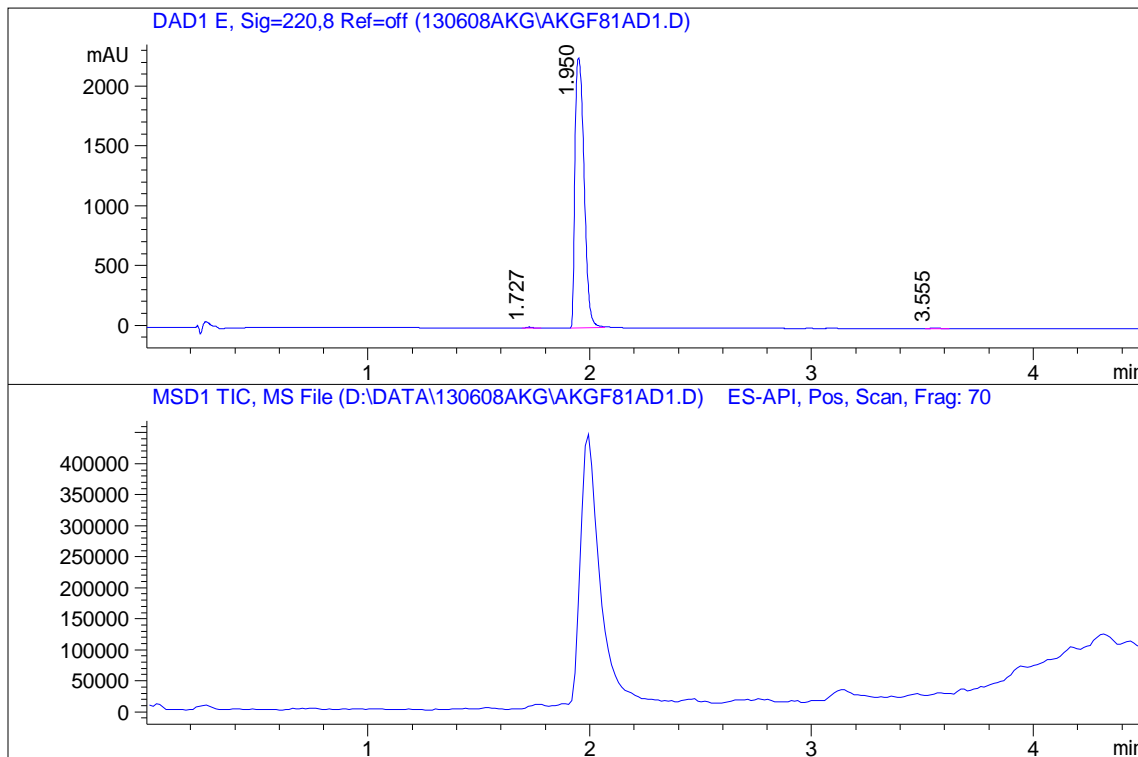

Report

```

=====
Signal 1 : DAD1 E, Sig=220,8 Ref=off
Peak RT      Area   Height Height % Width Area %
# [min]
-----
1  1.727  17.777   9.103   0.400   0.030   0.274
2  1.950 6464.316 2257.551 99.271   0.046  99.452
3  3.555  17.825   7.483   0.329   0.038   0.274
-----
    
```

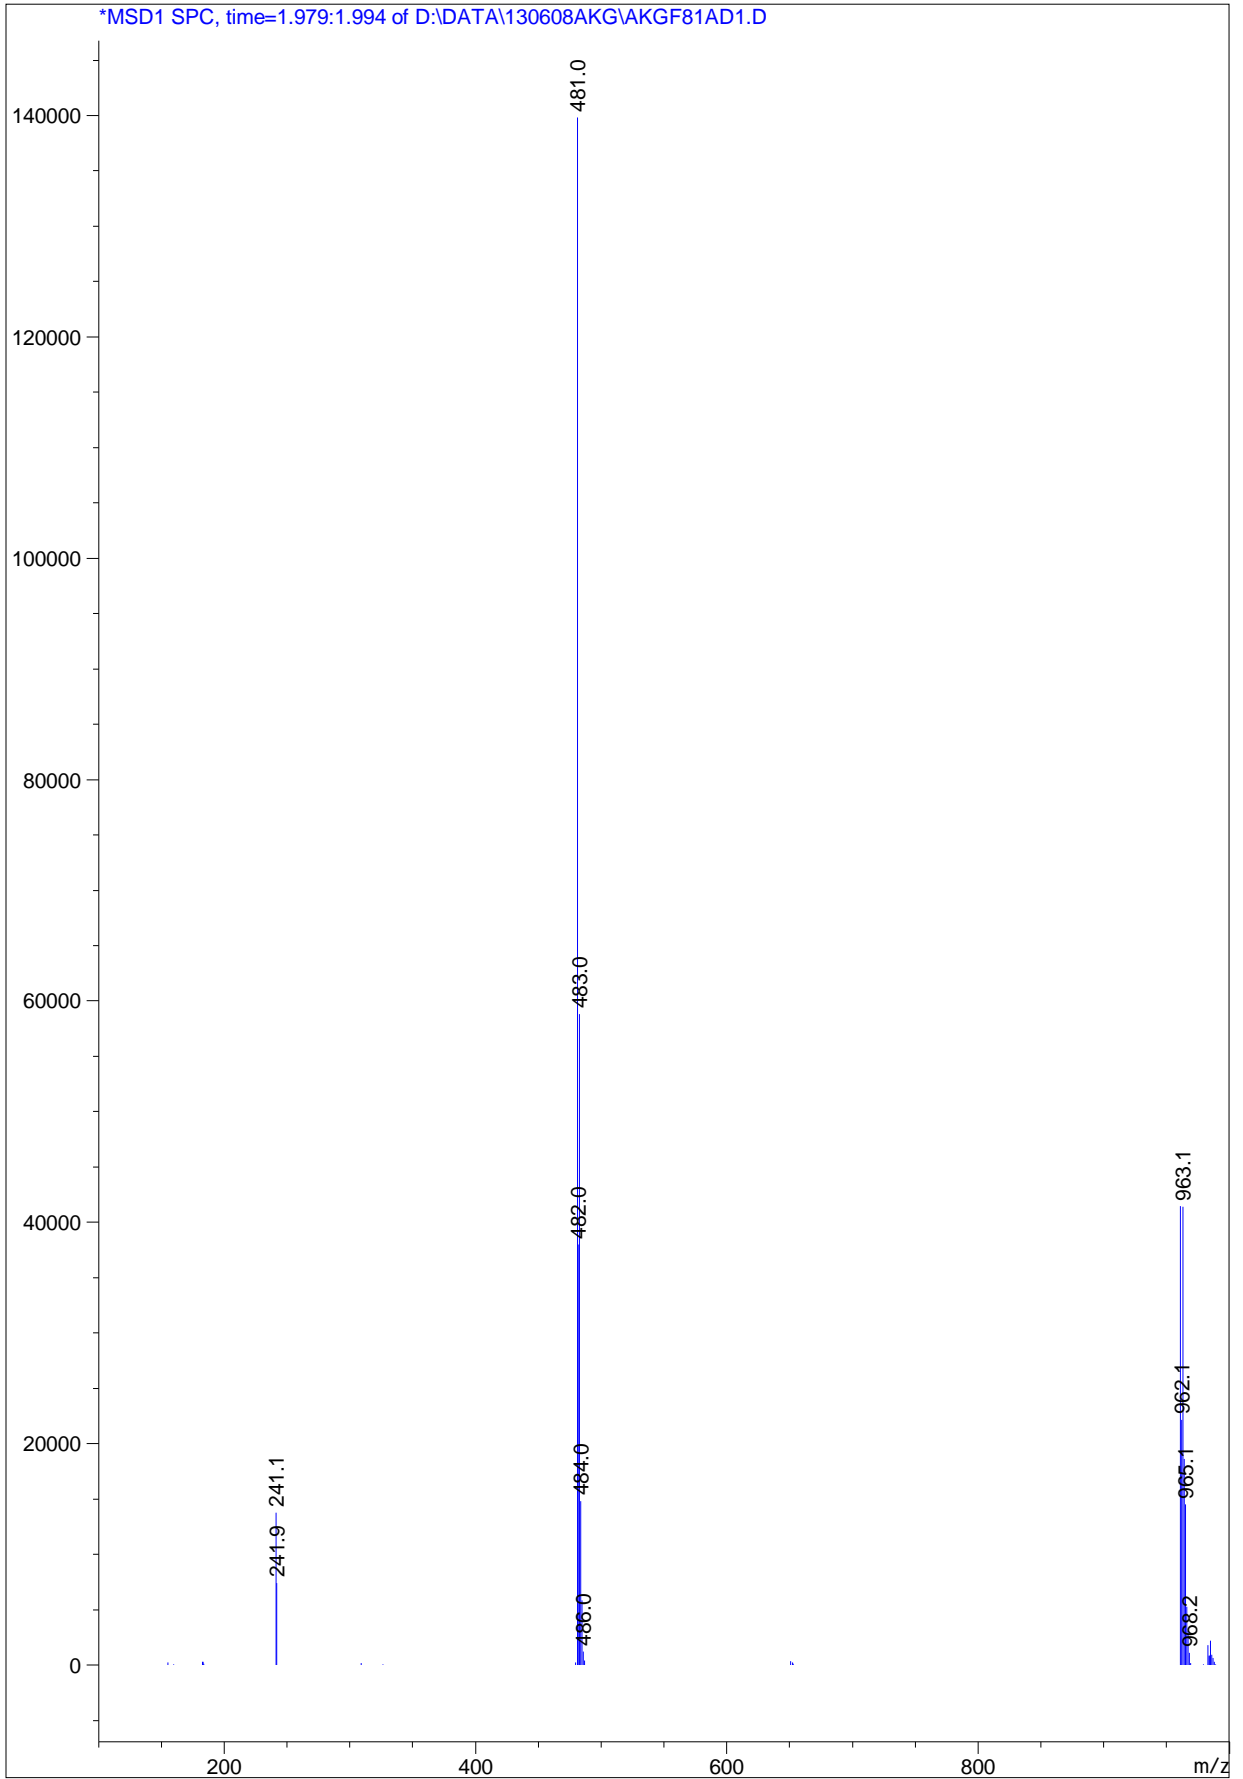

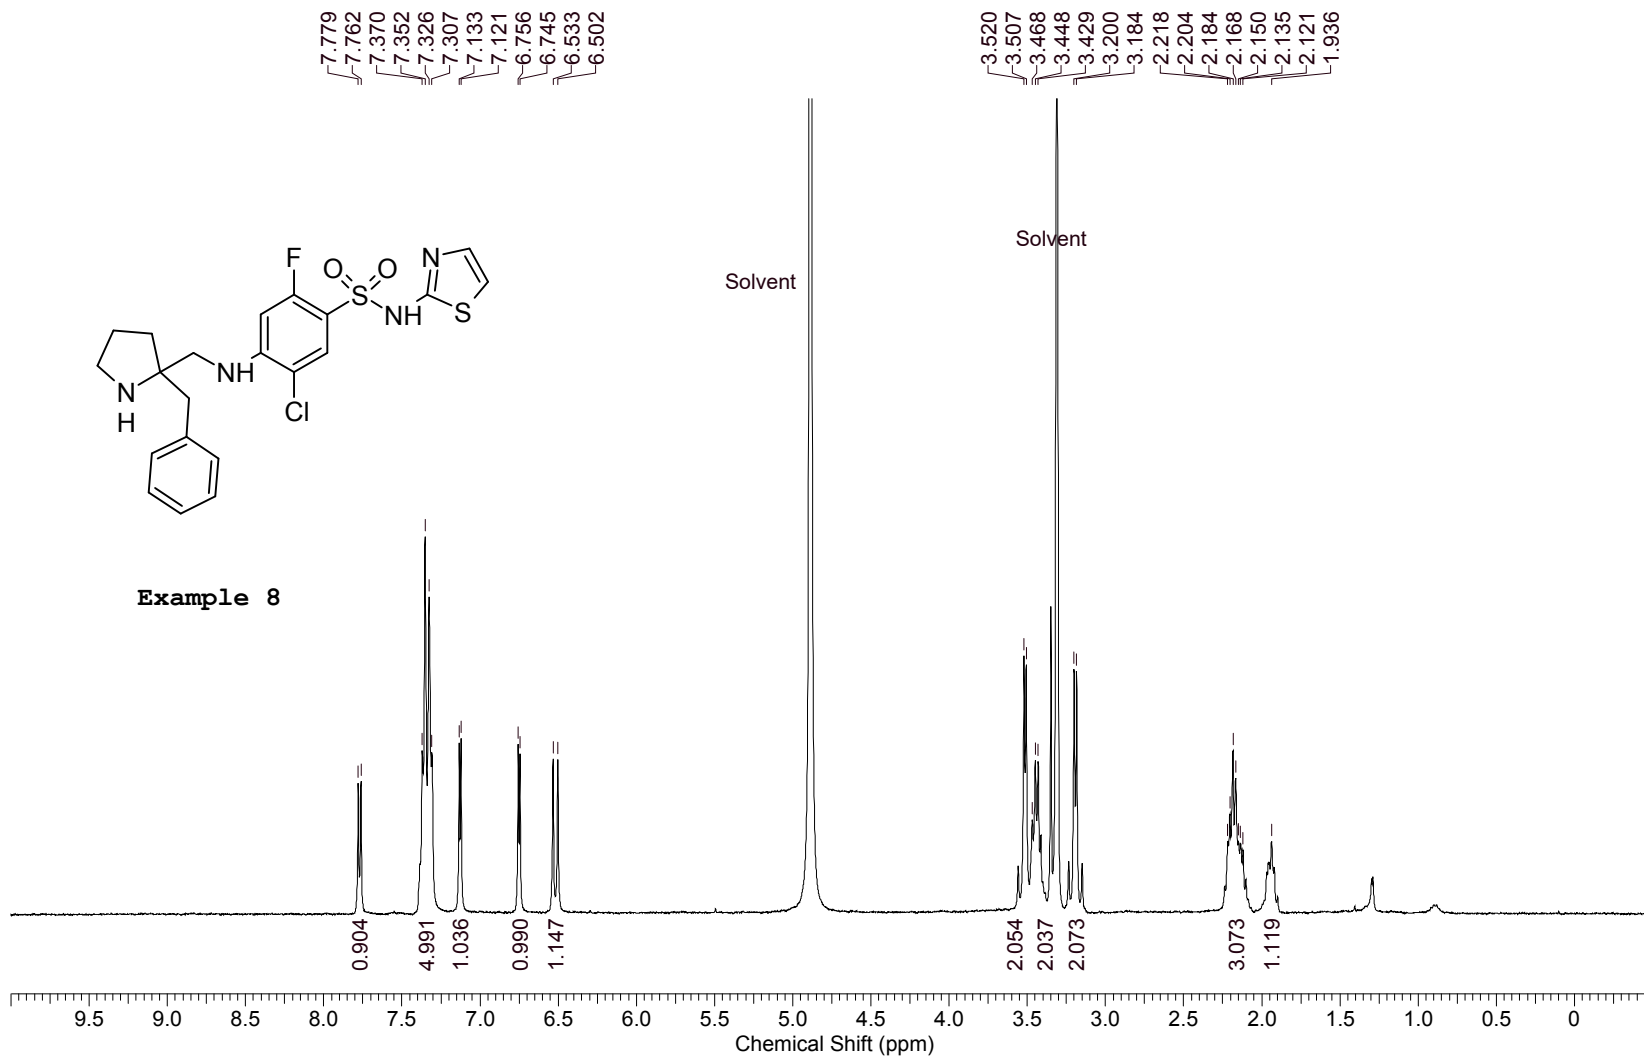

|                        |                                                                      |
|------------------------|----------------------------------------------------------------------|
| Acquisition Time (sec) | 2.0486                                                               |
| Comment                | J000261204<br>4<br>h18735-14<br>9-1<br>Methanol-<br>d4 varian<br>400 |
| Date                   | Jun 8<br>2013                                                        |
| Frequency (MHz)        | 399.74                                                               |
| Nucleus                | 1H                                                                   |
| Number of Transients   | 8                                                                    |
| Original Points Count  | 13132                                                                |
| Points Count           | 16384                                                                |
| Pulse Sequence         | s2pul                                                                |
| Receiver Gain          | 60.00                                                                |
| Solvent                | METHAN<br>OL-d4                                                      |
| Spectrum Offset (Hz)   | 2401.3135                                                            |
| Spectrum Type          | STANDA<br>RD                                                         |
| Sweep Width (Hz)       | 6410.26                                                              |
| Temperature (degree C) | AMBIENT<br>TEMPER<br>ATURE                                           |

Operator:

Date:

Compound ID: EBR0084\_C1270\_A\_001

J000298784 0355912-0045-1 Methanol-d4 400MHz

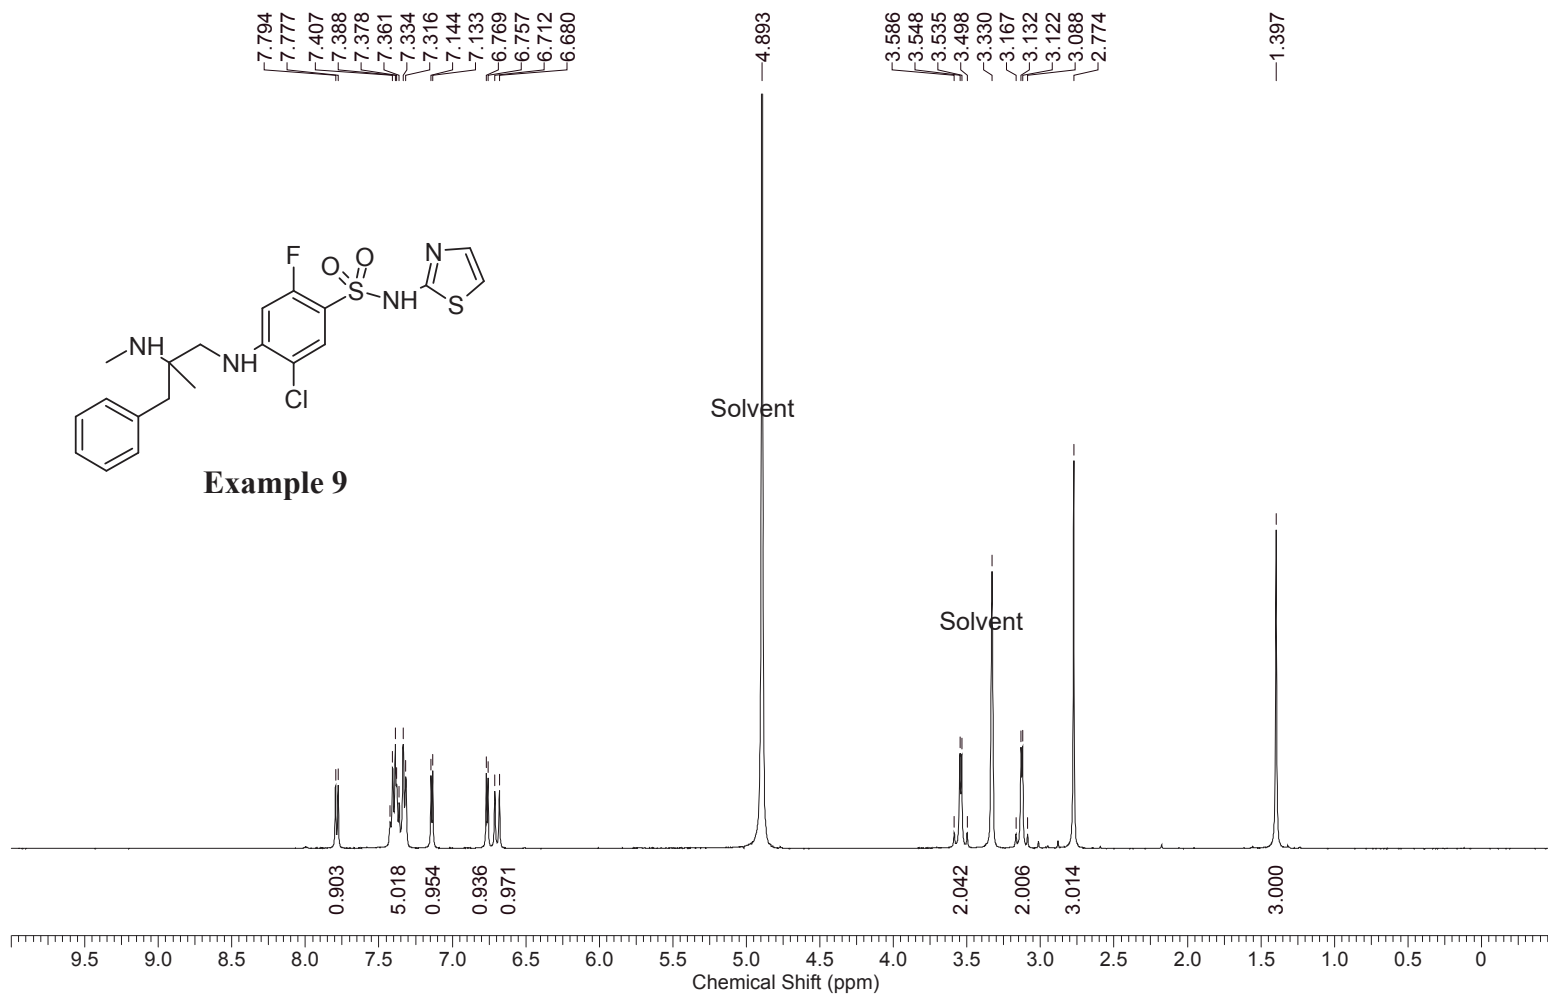

|                        |                                                                   |
|------------------------|-------------------------------------------------------------------|
| Acquisition Time (sec) | 1.9923                                                            |
| Comment                | J00029878<br>4<br>0355912-0<br>045-1<br>Methanol-<br>d4<br>400MHz |
| Date                   | 27 Feb<br>2014<br>14:56:00                                        |
| Frequency (MHz)        | 400.13                                                            |
| Nucleus                | 1H                                                                |
| Number of Transients   | 8                                                                 |
| Origin                 | spect                                                             |
| Original Points Count  | 16384                                                             |
| Owner                  | nmrsu                                                             |
| Points Count           | 16384                                                             |
| Pulse Sequence         | zg30                                                              |
| Receiver Gain          | 203.00                                                            |
| SW(cyclical) (Hz)      | 8223.68                                                           |
| Solvent                | METHAN<br>OL-d4                                                   |
| Spectrum Offset (Hz)   | 2470.9683                                                         |
| Spectrum Type          | STANDA<br>RD                                                      |
| Sweep Width (Hz)       | 8223.18                                                           |
| Temperature (degree C) | 27.000                                                            |

Operator:

Date:

=====  
Injection Date : Fri, 28. Feb. 2014  
Acq Operator : AL260  
Location : P1-E-09  
Inj. Vol. : 2.0 u1  
Acq Method : C:\HPCHEM\1\METHODS\WUXIAB10.M  
Data Filename : P:\140227AG\AGBR1E11.D  
LC-MS

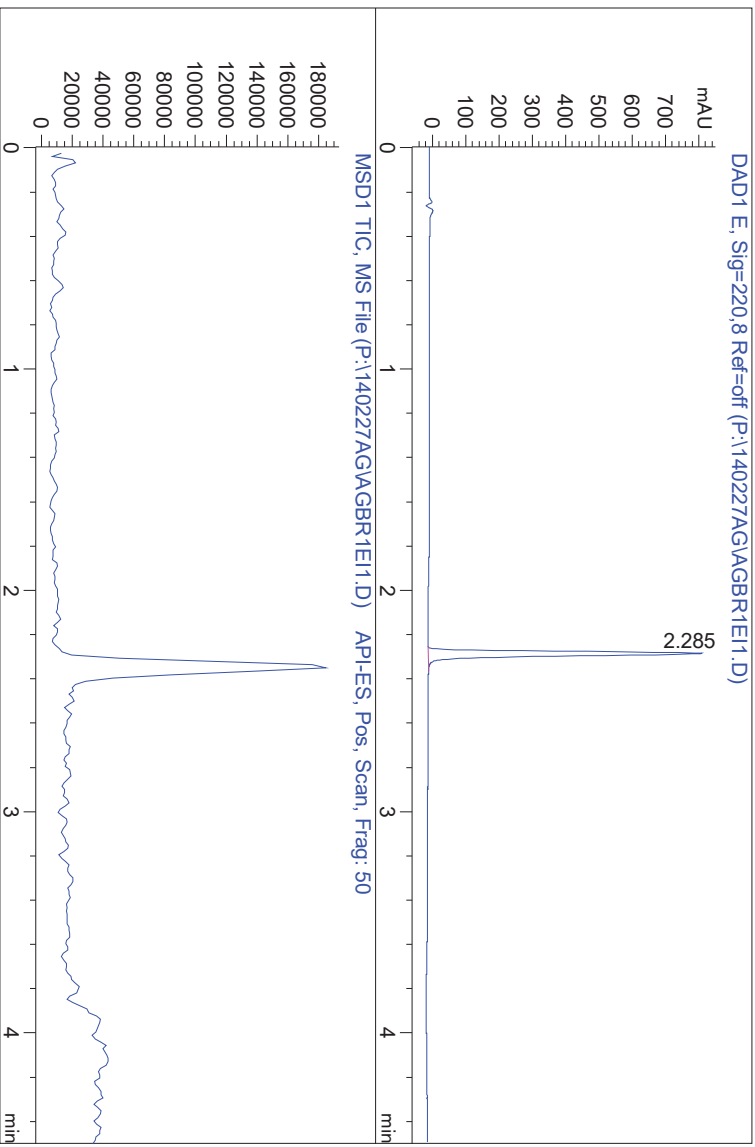

=====  
Report  
=====

Signal 1 : DAD1 E, Sig=220,8 Ref=off

| Peak # | RT [min] | Area     | Height  | Height % | Width [min] | Area %  |
|--------|----------|----------|---------|----------|-------------|---------|
| 1      | 2.285    | 1181.566 | 823.743 | 100.000  | 0.023       | 100.000 |

-----

\*MSD1 SPC, time=2.366 of P:\140227\AG\GBR1E11.D

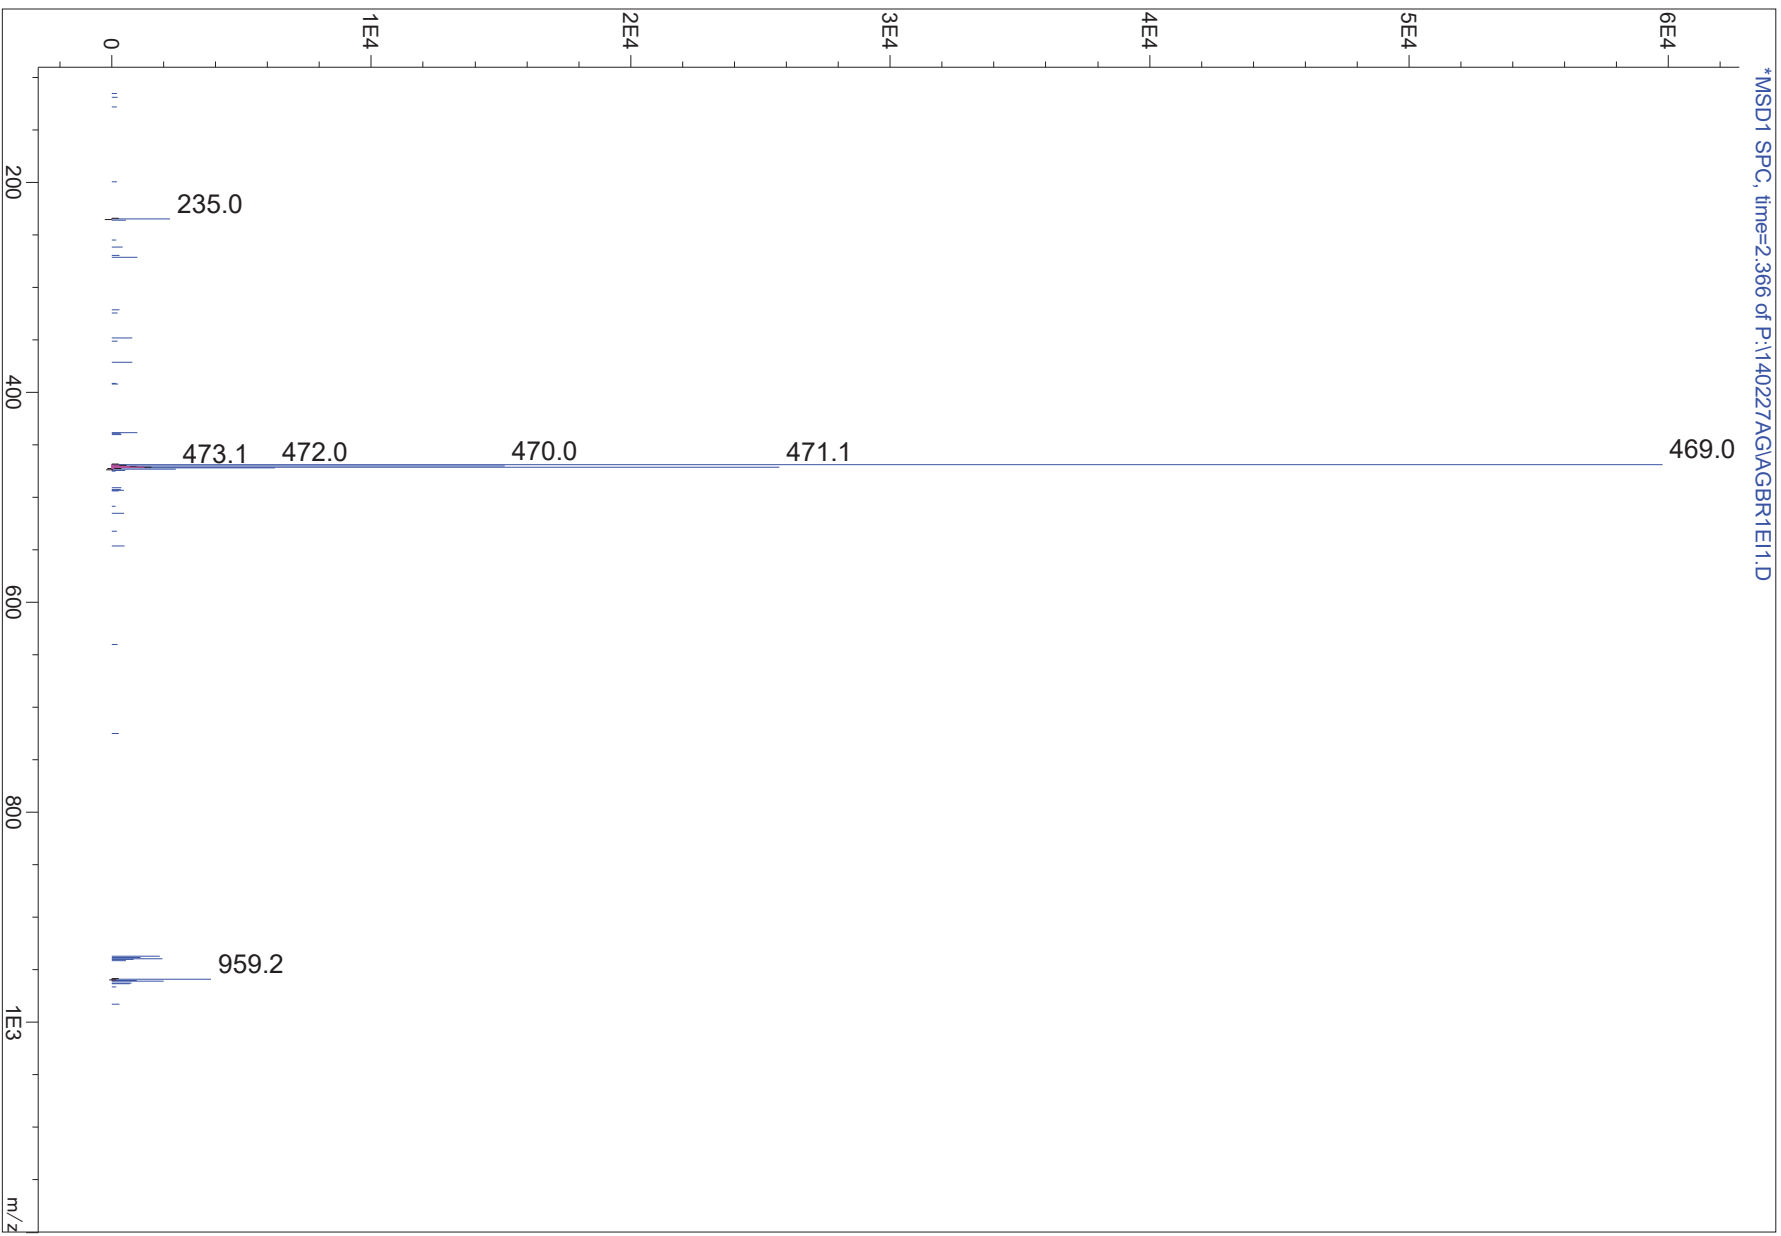

CHIRAL SFC REPORT

->

Compound ID : 0355912-0045-1c  
Filename/Sample ID: 0355912-0045-1c\_M1  
Injection Date : 2/28/2014  
Acq Method : D:\DATA\201402\20140228\AD-H\_5\_5\_40\_2,35ML.M  
Data Filename : D:\DATA\201402\20140228\0355912-0045-1c\_M1.D  
Instrument : SFC (12-102)

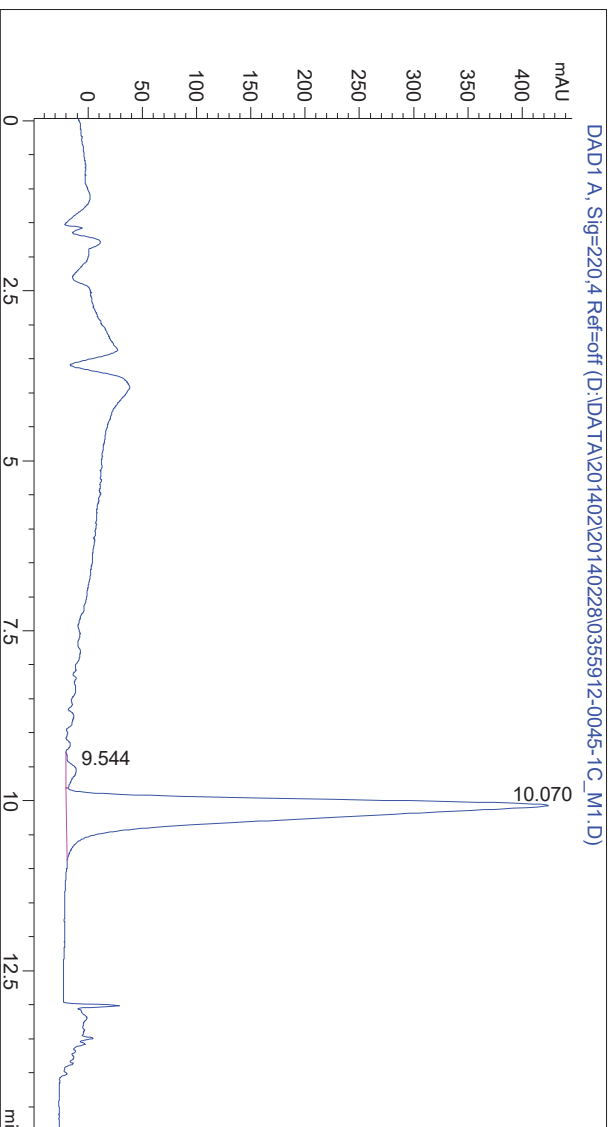

DAD1 A, Sig=220,4 Ref=off

| # | Meas. Ret. Time | Height  | Height % | Width | Area    | Area % |
|---|-----------------|---------|----------|-------|---------|--------|
| 1 | 9.544           | 9.329   | 2.059    | 0.217 | 149.559 | 1.774  |
| 2 | 10.070          | 443.775 | 97.941   | 0.264 | 8.280e3 | 98.226 |

Operator: \_\_\_\_\_

Date: \_\_\_\_\_

Compound ID: EBR0084\_C1270\_B\_001

J000298785 0355912-0046-1 Methanol-d4 400MHz

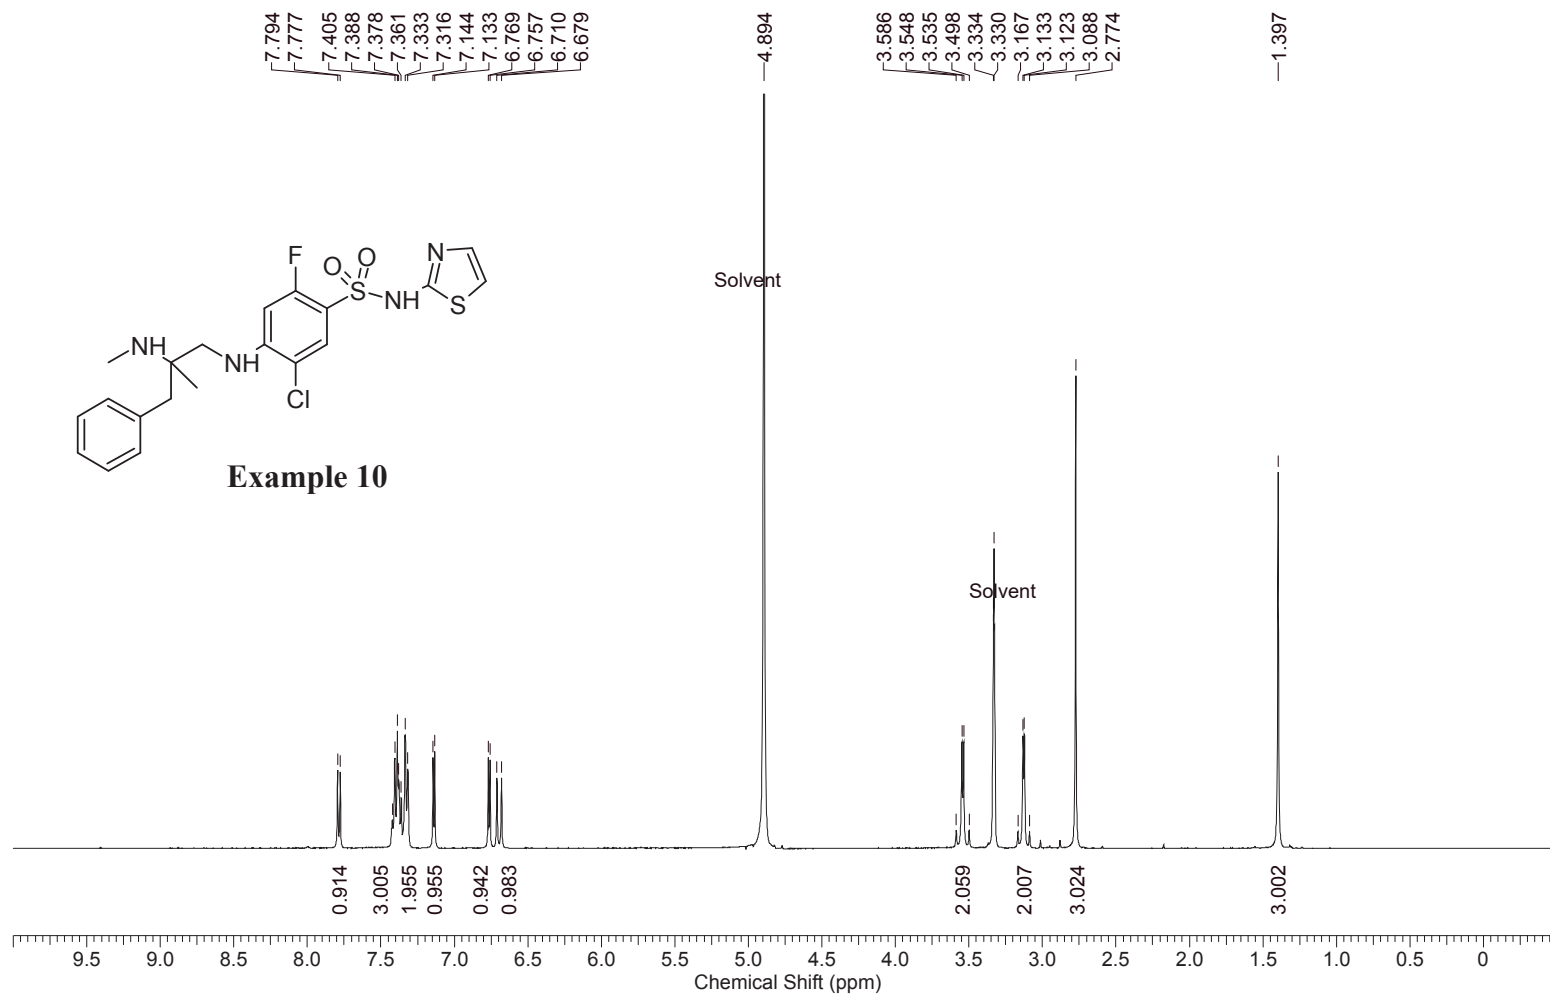

|                        |                                                                   |
|------------------------|-------------------------------------------------------------------|
| Acquisition Time (sec) | 1.9923                                                            |
| Comment                | J00029878<br>5<br>0355912-0<br>046-1<br>Methanol-<br>d4<br>400MHz |
| Date                   | 27 Feb<br>2014<br>15:00:16                                        |
| Frequency (MHz)        | 400.13                                                            |
| Nucleus                | 1H                                                                |
| Number of Transients   | 8                                                                 |
| Origin                 | spect                                                             |
| Original Points Count  | 16384                                                             |
| Owner                  | nmrsu                                                             |
| Points Count           | 16384                                                             |
| Pulse Sequence         | zg30                                                              |
| Receiver Gain          | 203.00                                                            |
| SW(cyclical) (Hz)      | 8223.68                                                           |
| Solvent                | METHAN<br>OL-d4                                                   |
| Spectrum Offset (Hz)   | 2470.9683                                                         |
| Spectrum Type          | STANDA<br>RD                                                      |
| Sweep Width (Hz)       | 8223.18                                                           |
| Temperature (degree C) | 27.000                                                            |

Operator:

Date:



=====  
Injection Date : Fri, 28. Feb. 2014  
Acq Operator : AL260  
Location : P1-F-01  
Inj. Vol. : 2.0 u1  
Acq Method : C:\HPCHEM\1\METHODS\WUXIAB10.M  
Data Filename : P:\140227AG\AGBR1FA1.D  
LC-MS

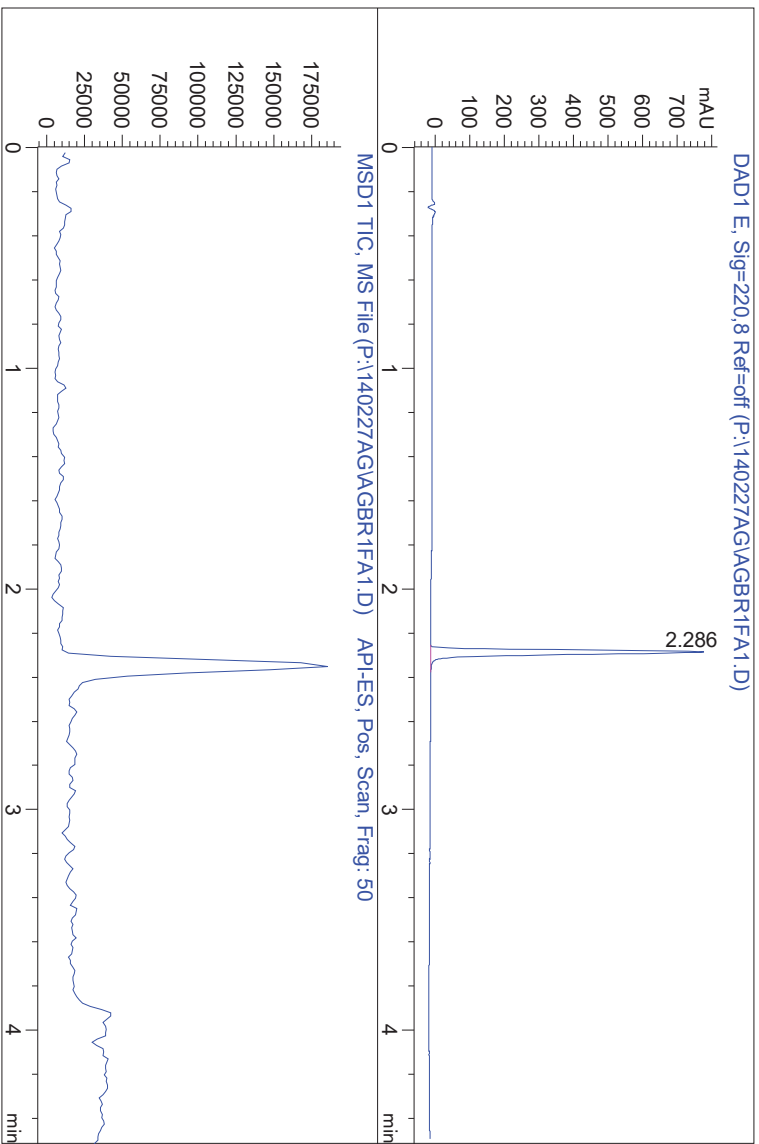

=====  
Report  
=====

Signal 1 : DAD1 E, Sig=220,8 Ref=off

| Peak # | RT [min] | Area     | Height  | Height % | Width [min] | Area %  |
|--------|----------|----------|---------|----------|-------------|---------|
| 1      | 2.286    | 1128.728 | 791.173 | 100.000  | 0.022       | 100.000 |

-----

\*MSD1 SPC, time=2.365 of P:\140227\AG\GBR1FA1.D

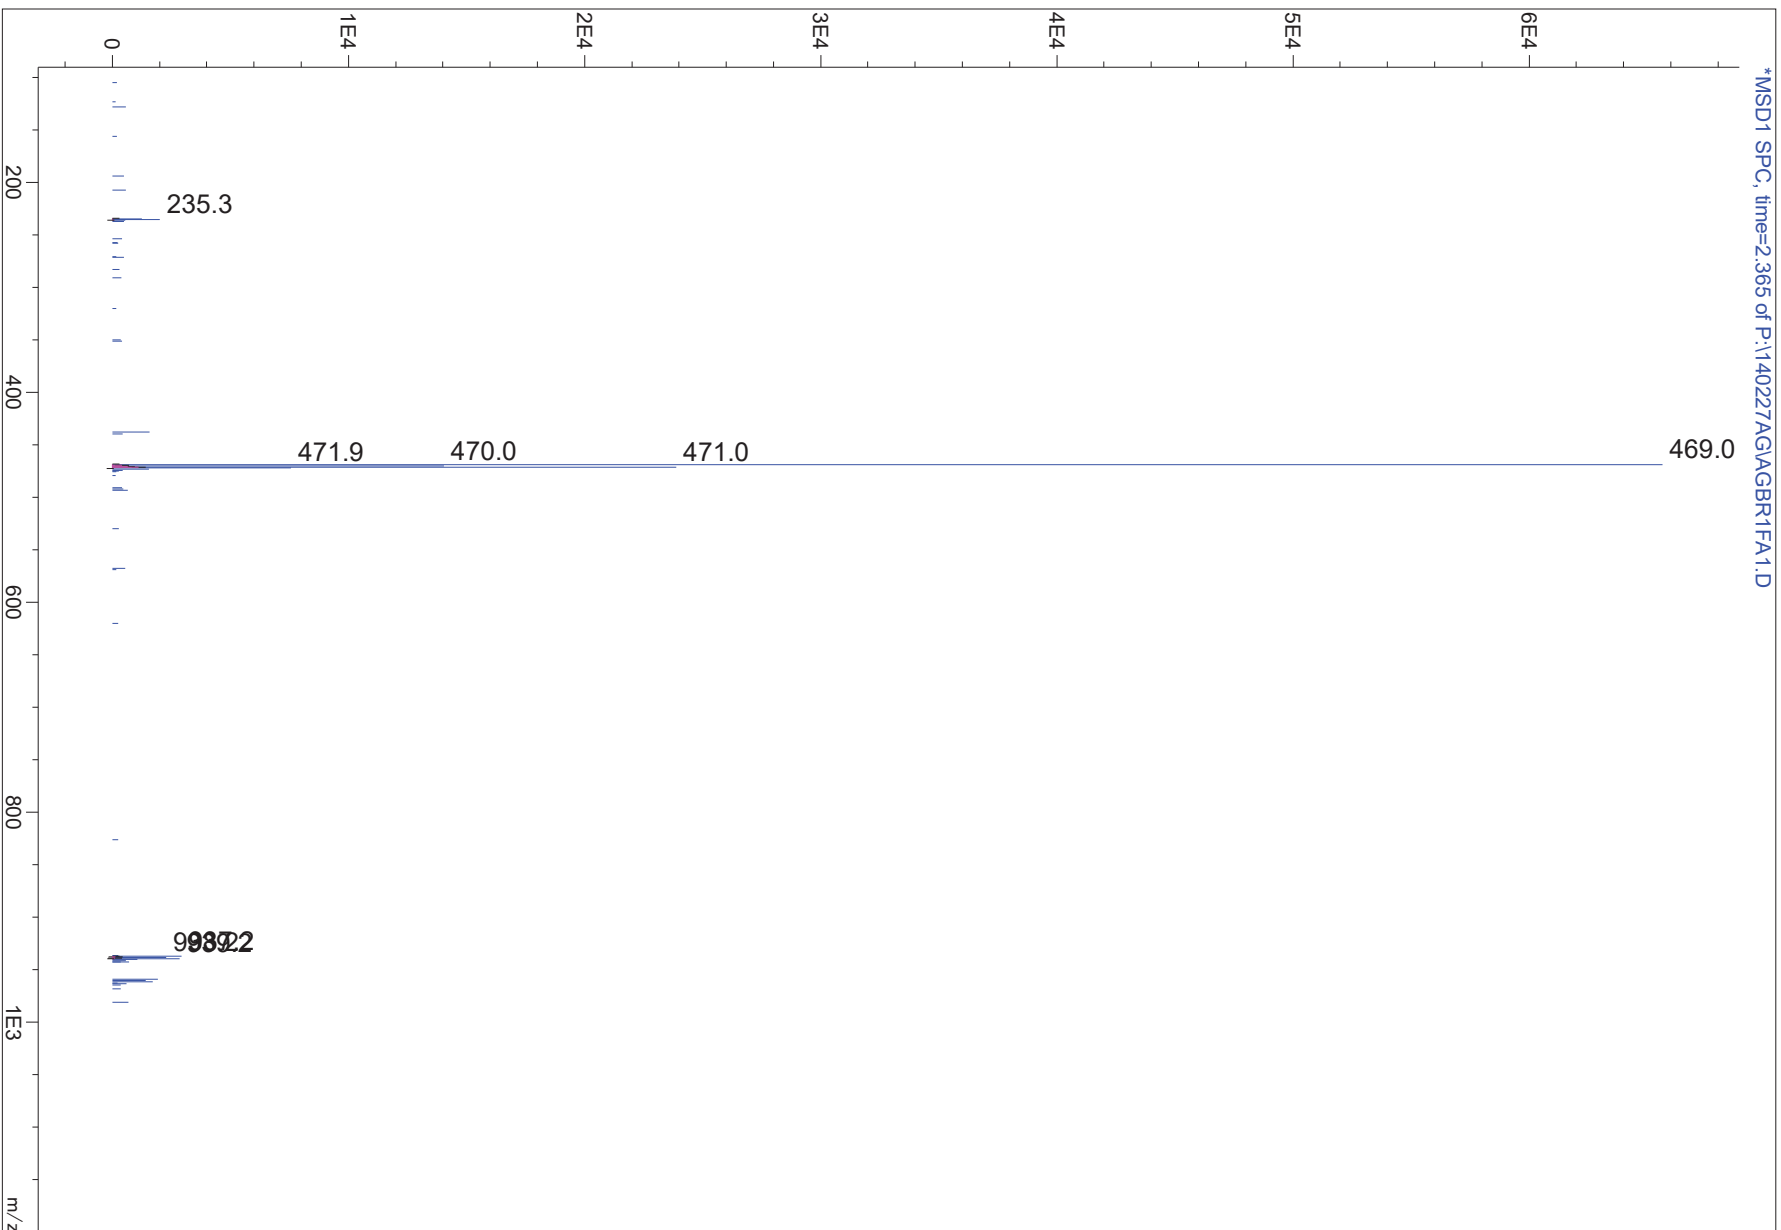

CHIRAL SFC REPORT

->

Compound ID : 0355912-0046-1c  
Filename/Sample ID: 0355912-0046-1c\_M1  
Injection Date : 2/28/2014  
Acq Method : D:\DATA\201402\20140228\AD-H\_5\_5\_40\_2,35ML.M  
Data Filename : D:\DATA\201402\20140228\0355912-0046-1c\_M1.D  
Instrument : SFC (12-102)

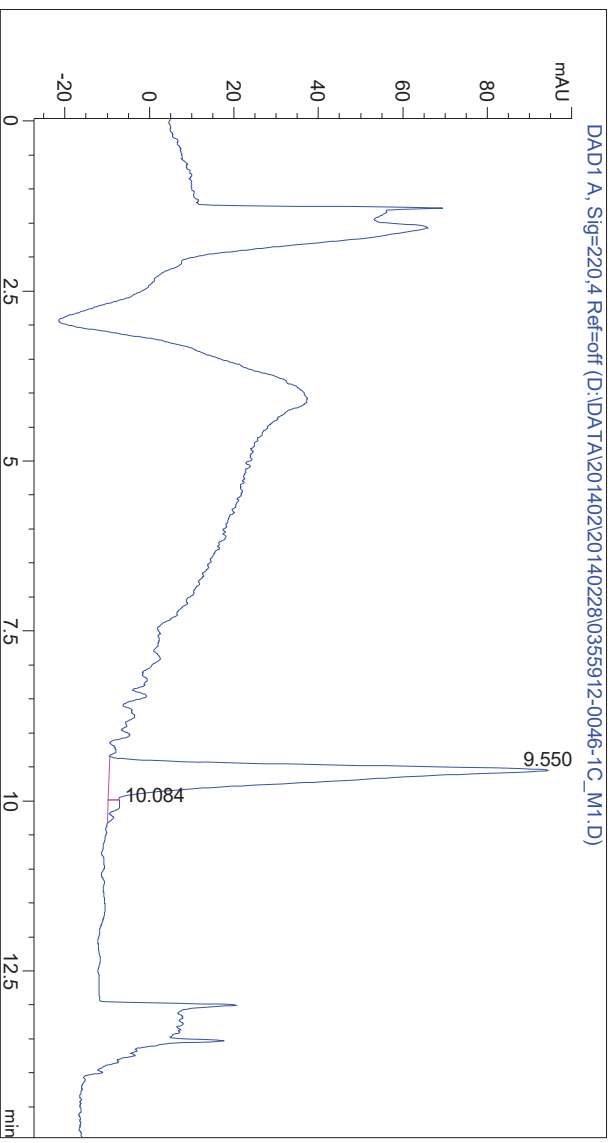

DAD1 A, Sig=220,4 Ref=off

| # | Meas. Ret. Time | Height  | Height % | Width | Area    | Area % |
|---|-----------------|---------|----------|-------|---------|--------|
| 1 | 9.550           | 103.940 | 97.376   | 0.255 | 1.590e3 | 97.929 |
| 2 | 10.084          | 2.801   | 2.624    | 0.200 | 33.643  | 2.071  |

Operator: \_\_\_\_\_

Date: \_\_\_\_\_

kelmicha-0348418-0082-P1-H1[3]

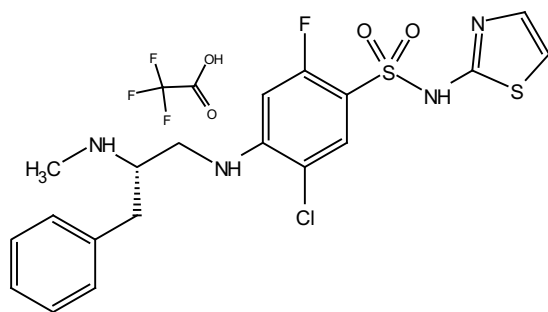

**Example 11**

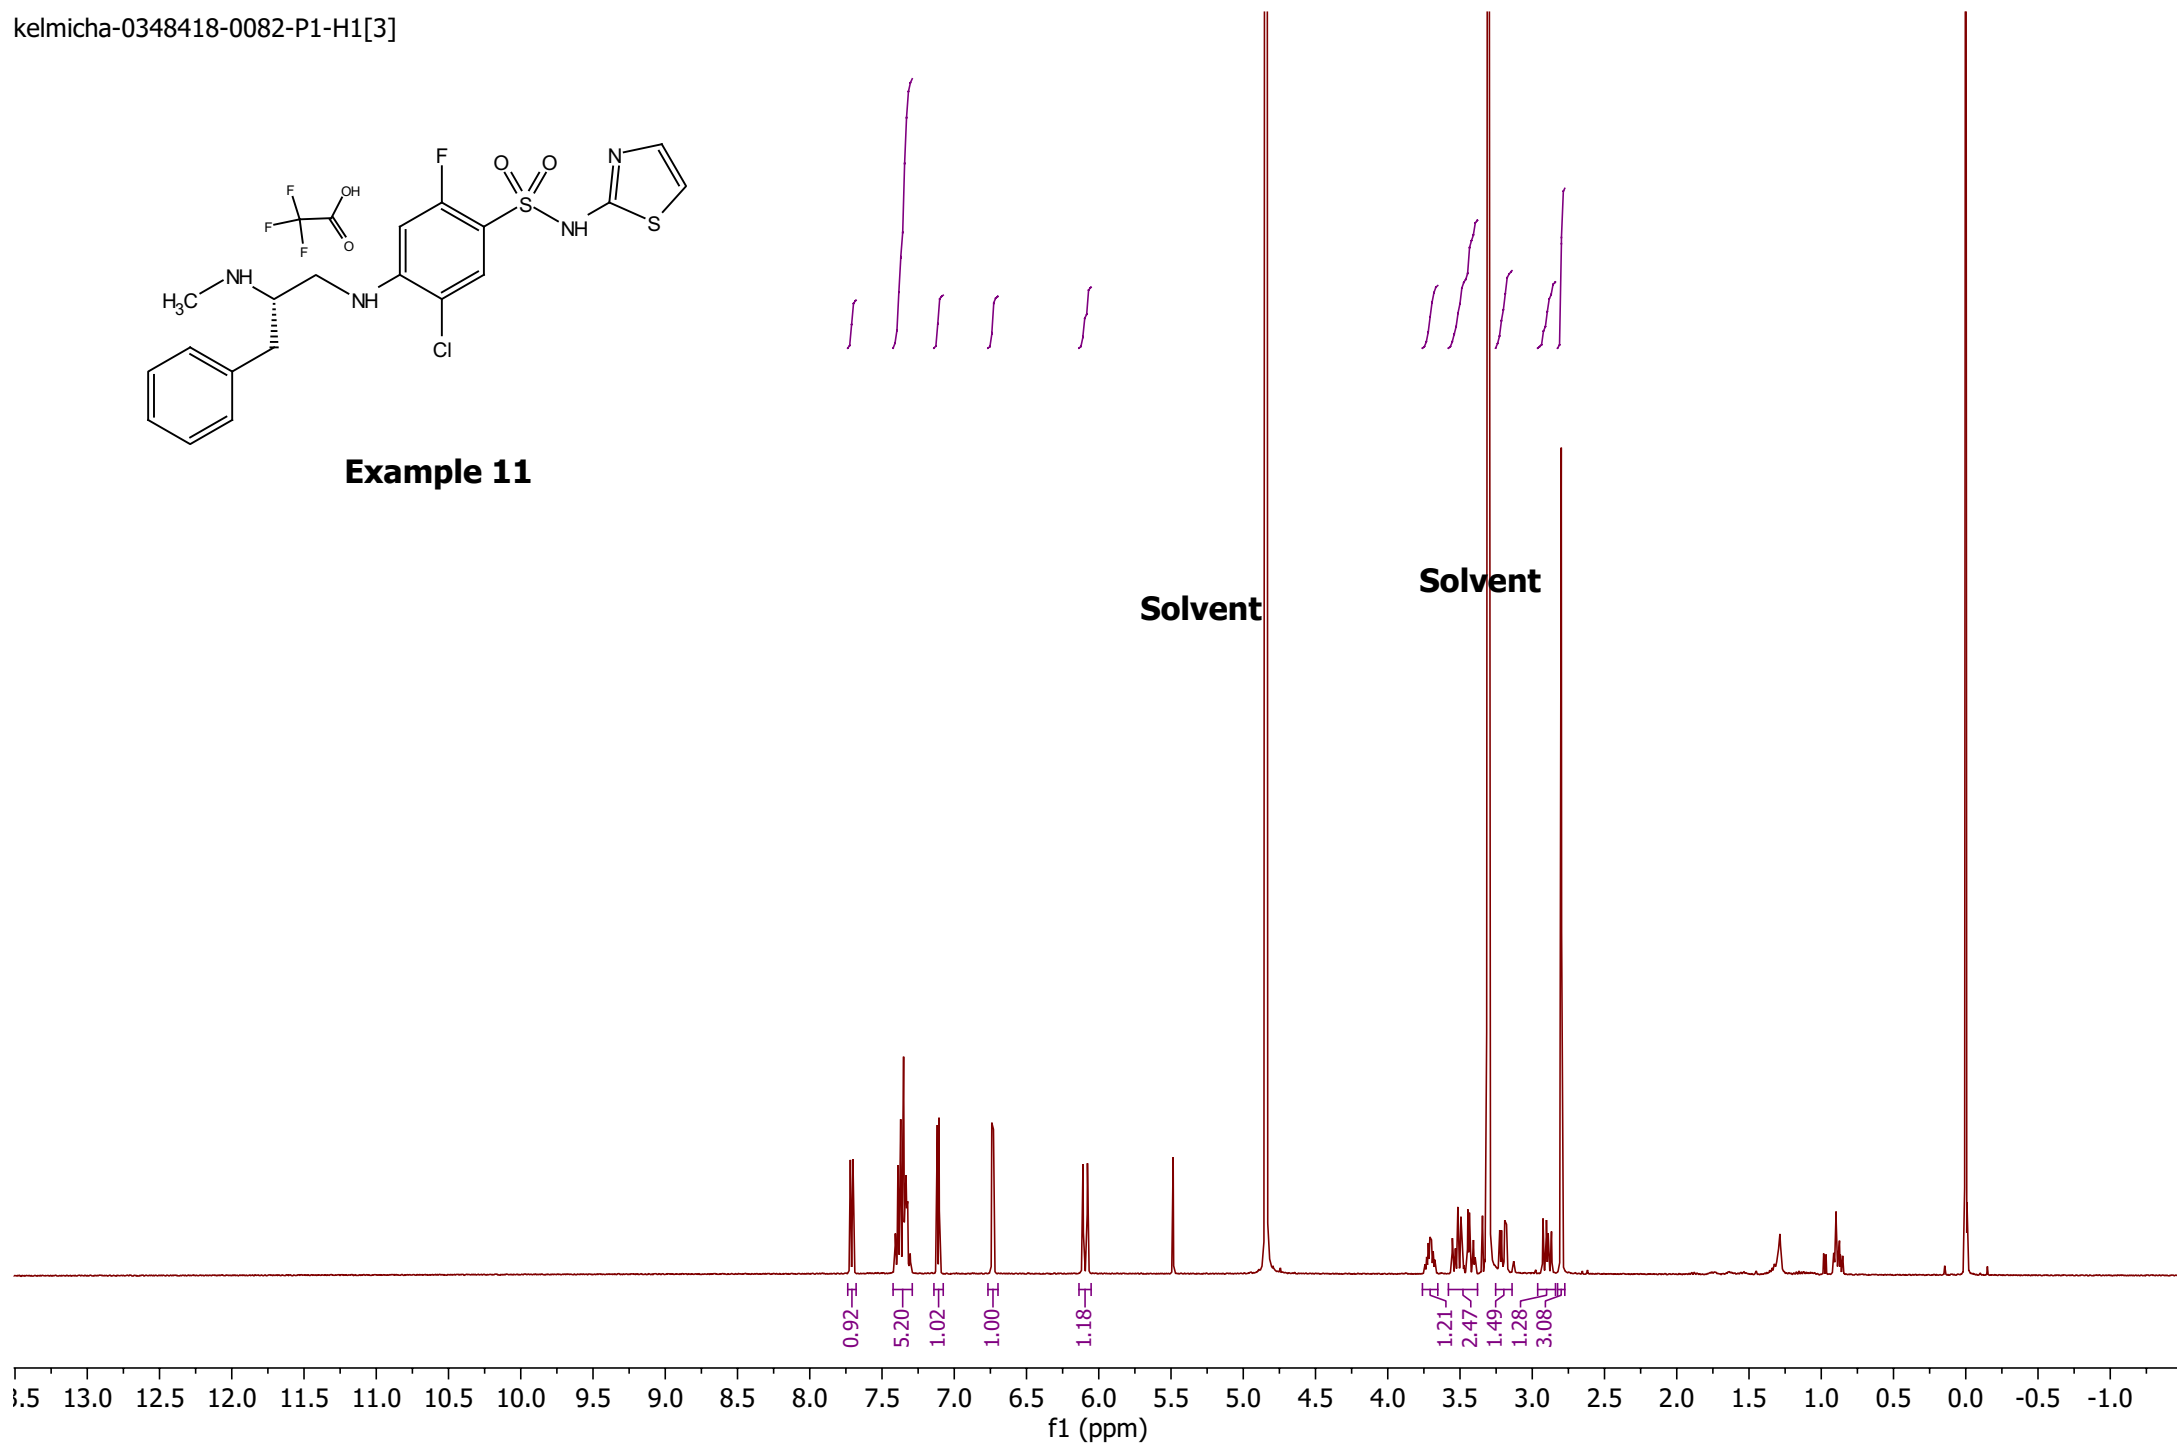

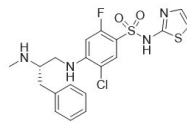

**Openlynx Report - Merck Restricted Confidential - kelmicha**

Sample: 2  
 ID:0348418-0082-P1  
 Lab 3117

Vial:2:12  
 Description:TFA SALT  
 Method:C:\MassLynx\Purity UPLC 2 Min - 1st Reg.olg

Date:28-Aug-2013  
 JobCode:kelmicha13588

Printed: Wed Aug 28 15:07:25 2013

2: UV Detector: TIC Smooth (Mn, 1x2) (3) 2.50  
 Range: 2.51

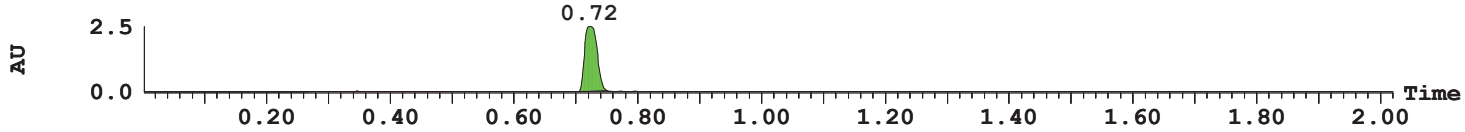

| Peak Number | Time | Area %Total | Mass Found | BPM   |
|-------------|------|-------------|------------|-------|
| 1           | 0.35 | 0.51        | 177.1      |       |
| 2           | 0.44 | 0.54        | 253.0      |       |
| 3           | 0.72 | 98.95       | 454.00     | 455.2 |

1: MS ES+ :TIC Smooth (Mn, 1x2) 8.6e+00

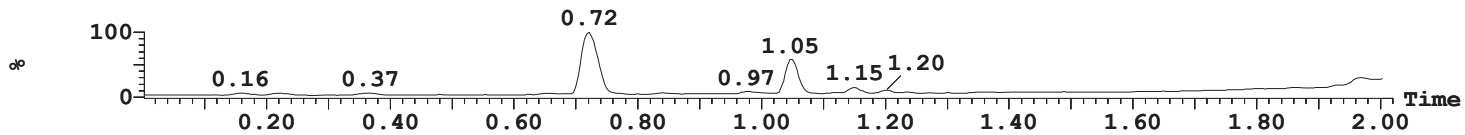

1: MS ES+ :455 1.0000Da Smooth (Mn, 1x2) 3.2e+00

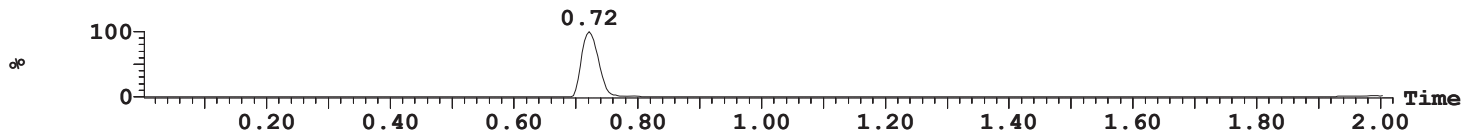

Peak ID 1 Time 0.35

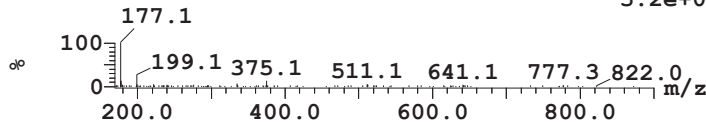

1:MS ES+  
5.2e+005

Peak ID 2 Time 0.44

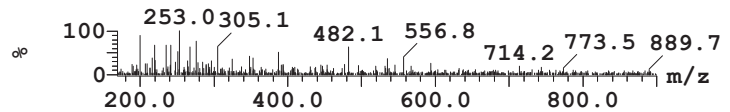

1:MS ES+  
2.2e+004

Peak ID 3 Time 0.72

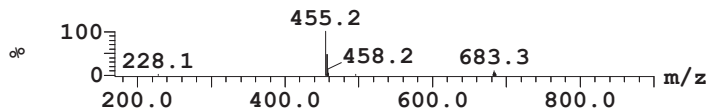

1:MS ES+  
2.3e+007

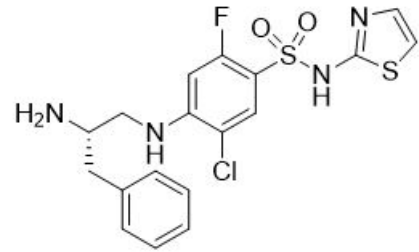

**Example 12**

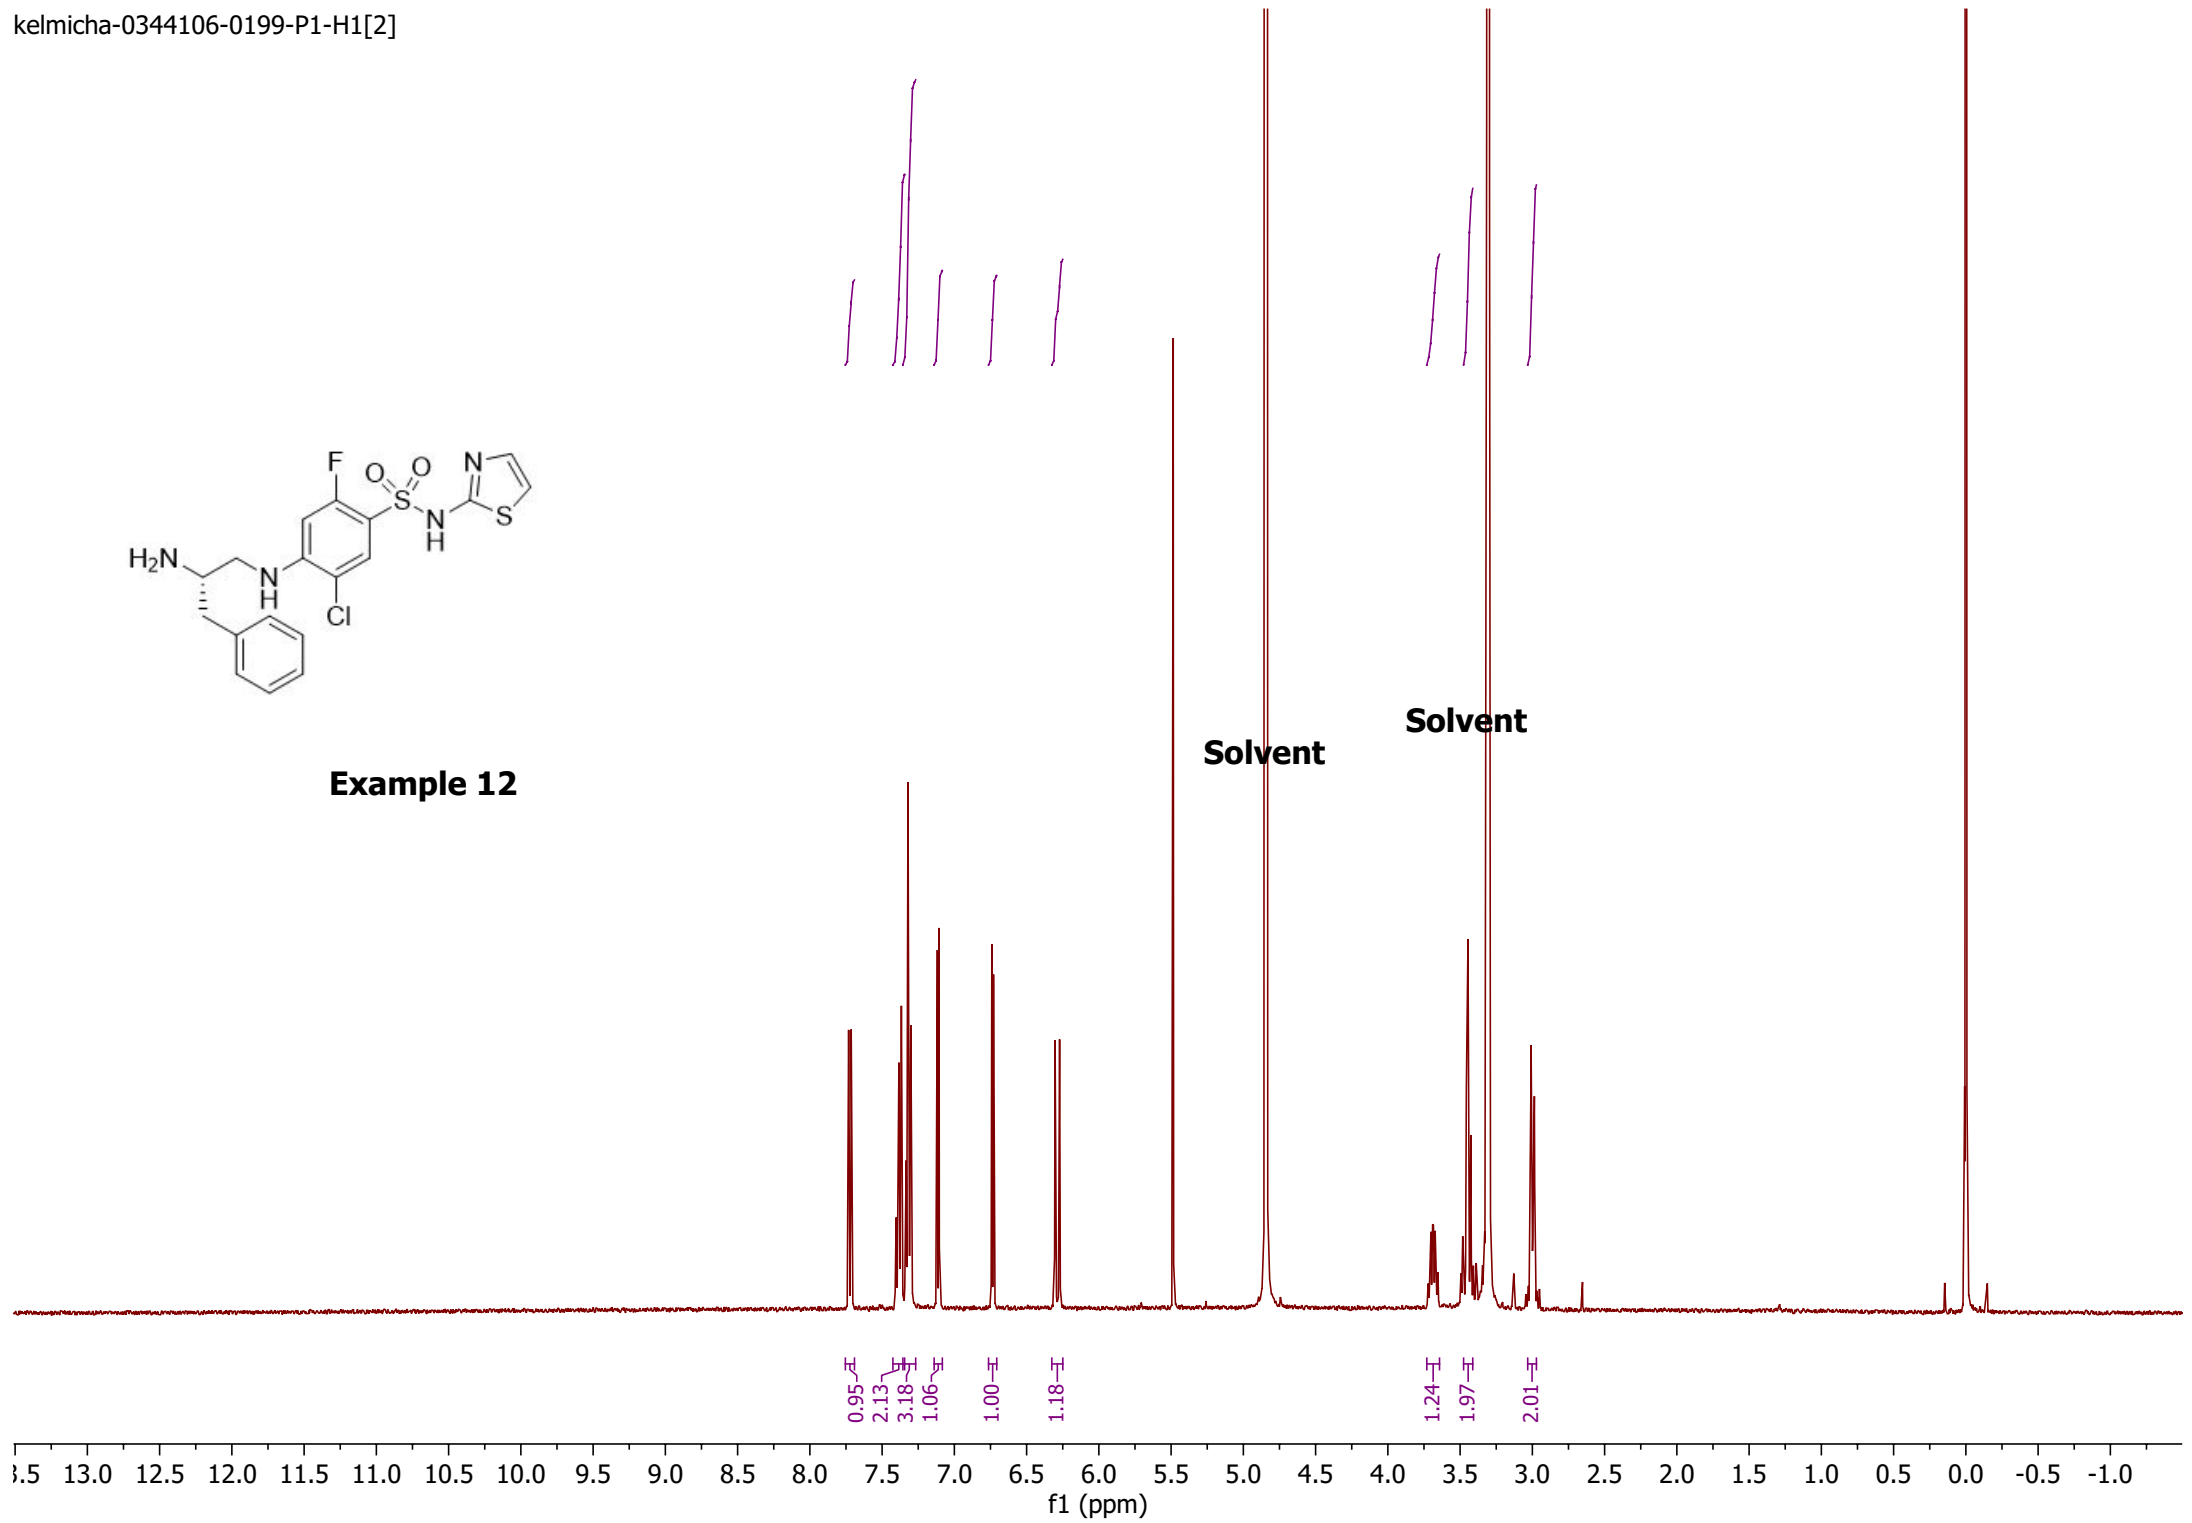

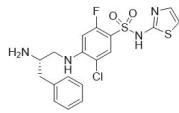

Openlynx Report - Merck Restricted Confidential - kelmicha

Sample: 1  
ID:0344106-0199-P1  
Lab 3117

Vial:1:44  
Description:  
Method:C:\MassLynx\Purity UPLC 2 Min - 1st Reg.olg

Date:23-Jul-2013  
JobCode:kelmicha13019

Printed: Tue Jul 23 17:20:16 2013

2: UV Detector: TIC Smooth (Mn, 1x2) (1) 2.48  
Range: 2.48

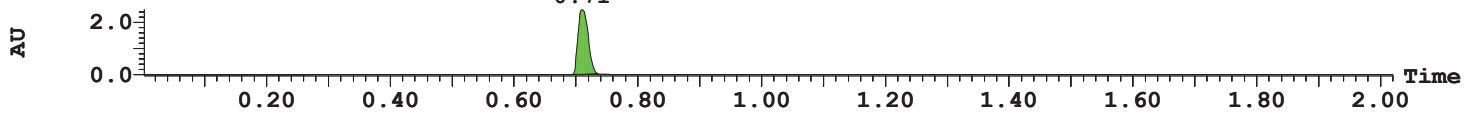

| Peak Number | Time | Area %Total | Mass Found | BPM   |
|-------------|------|-------------|------------|-------|
| 1           | 0.71 | 100.00      | 440.00     | 441.1 |

1: MS ES+ :TIC Smooth (Mn, 1x2) 9.1e+00

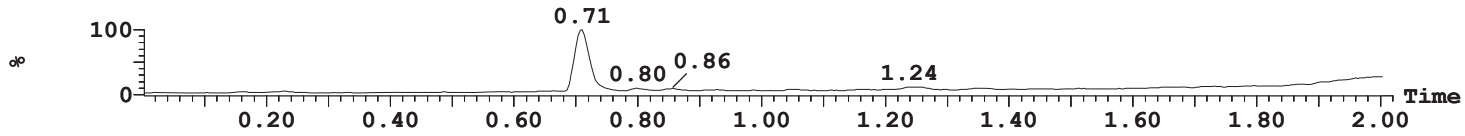

1: MS ES+ :441 1.0000Da Smooth (Mn, 1x2) 2.8e+00

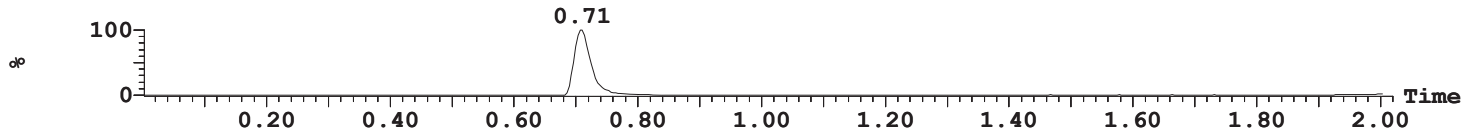

Peak ID Time  
1 0.71

1:MS ES+  
1.8e+007

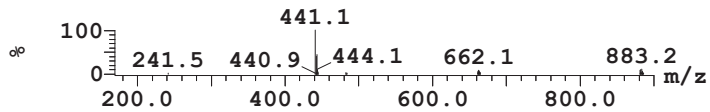

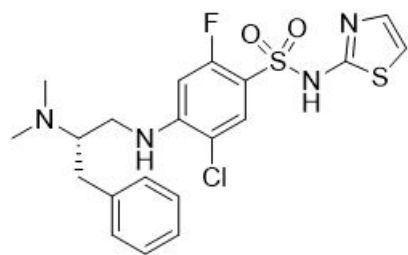

**Example 13**

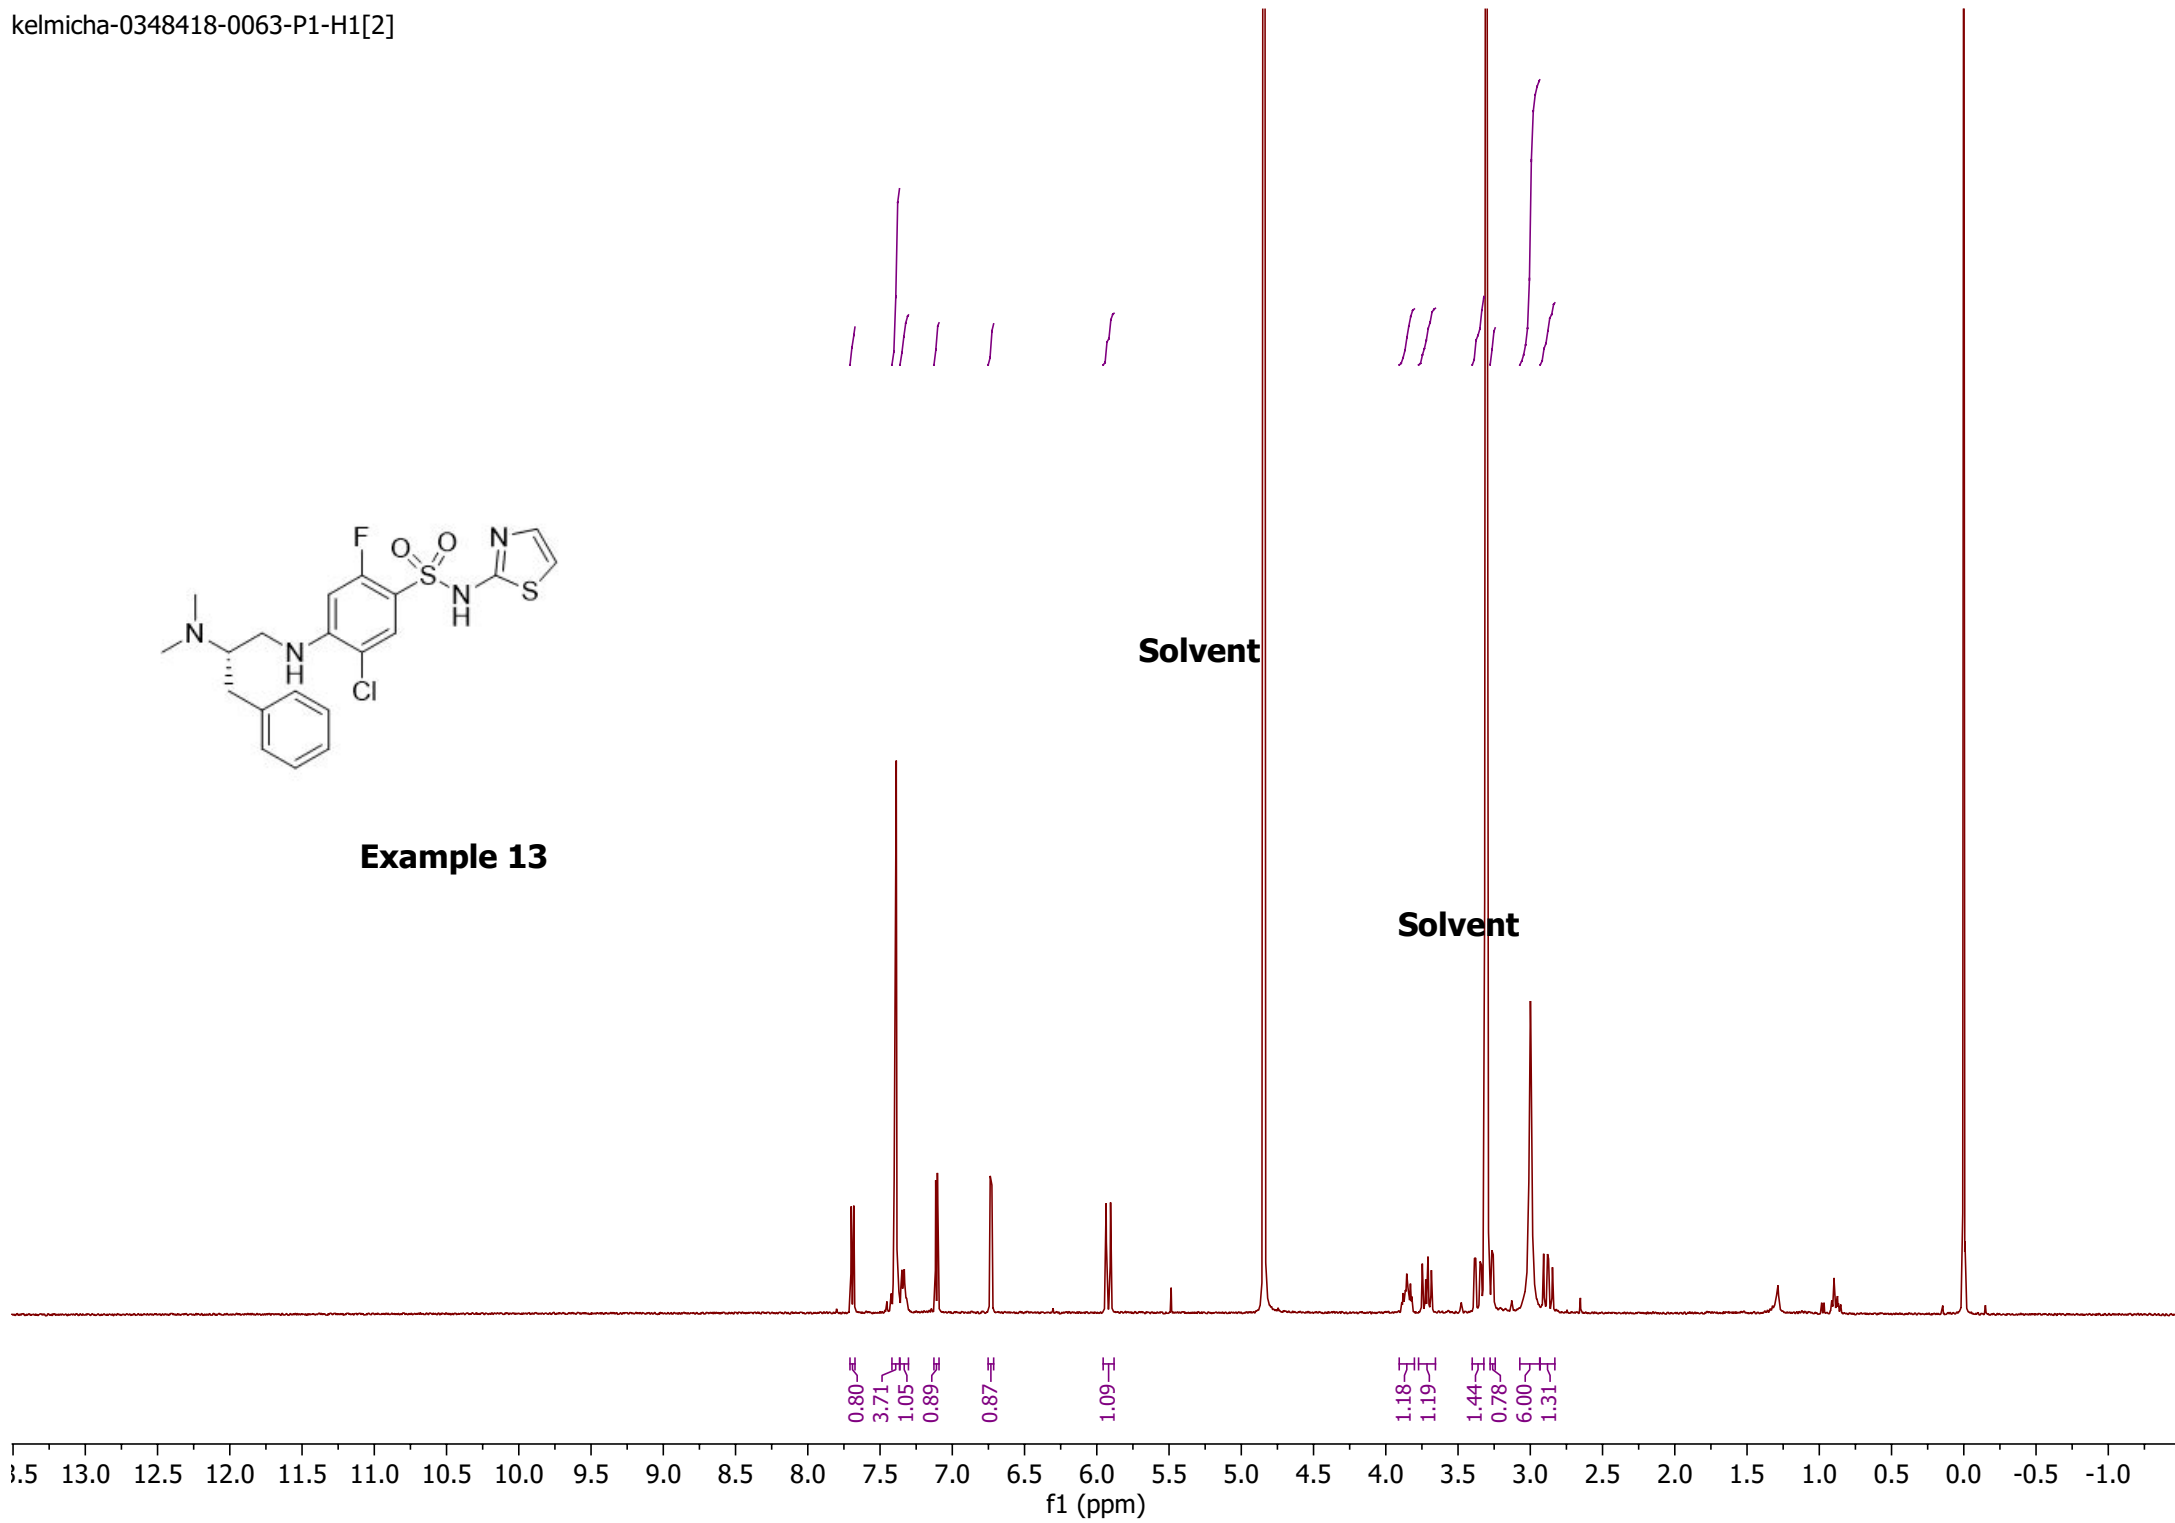



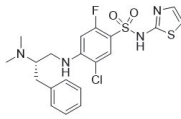

Openlynx Report - Merck Restricted Confidential - kelmicha

Sample: 2  
 ID:0348418-0063-P1  
 Lab 3117

Vial:1:22  
 Description:  
 Method:C:\MassLynx\Purity UPLC 2 Min - 1st Reg.olg

Date:20-Aug-2013  
 JobCode:kelmicha13460

Printed: Tue Aug 20 16:09:22 2013

2: UV Detector: TIC Smooth (Mn, 1x2)

2.42

Range: 2.43

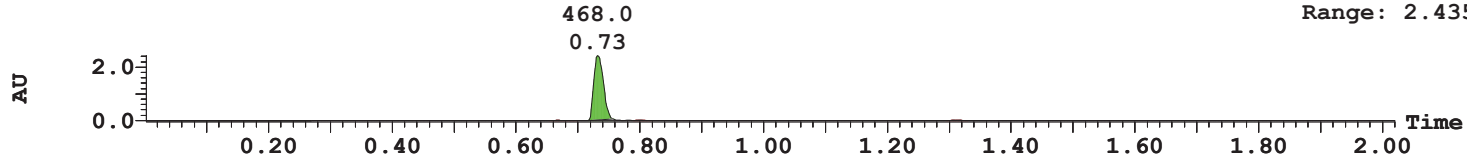

| Peak Number | Time | Area %Total | Mass Found | BPM   |
|-------------|------|-------------|------------|-------|
| 1           | 0.67 | 0.34        |            | 251.2 |
| 2           | 0.73 | 98.70       | 468.00     | 469.2 |
| 3           | 0.80 | 0.32        |            | 483.1 |
| 4           | 1.31 | 0.63        |            | 295.2 |

1: MS ES+ :TIC Smooth (Mn, 1x2)

8.0e+00

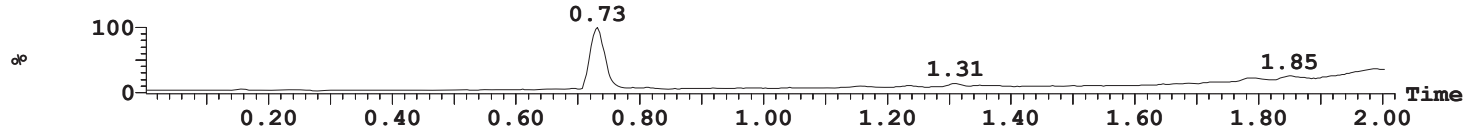

1: MS ES+ :469 1.0000Da Smooth (Mn, 1x2)

3.8e+00

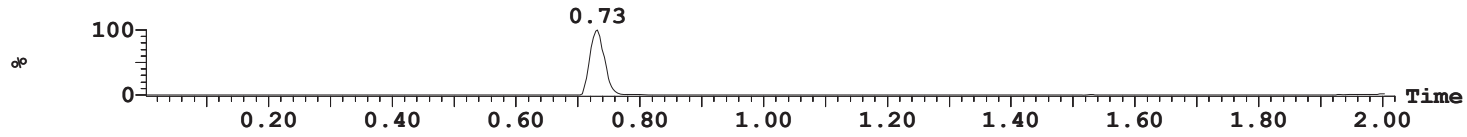

Peak ID 1  
 Time 0.67

Peak ID 2  
 Time 0.73

1:MS ES+  
 5.5e+004

1:MS ES+  
 2.2e+007

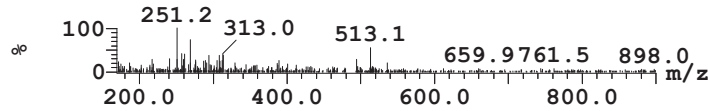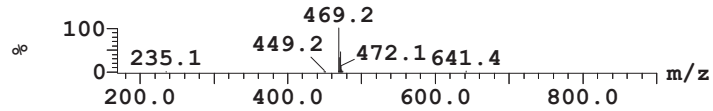

Peak ID 3  
 Time 0.80

Peak ID 4  
 Time 1.31

1:MS ES+  
 3.2e+005

1:MS ES+  
 5.1e+005

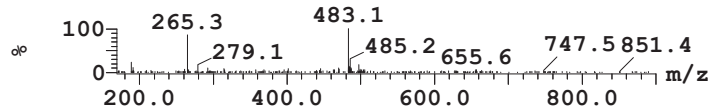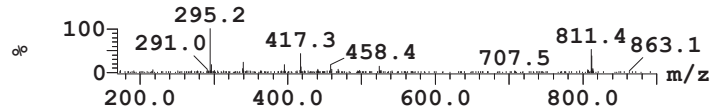

Compound ID: EBR0084\_C1643\_002

J000335354 0365308-009-1 Methanol-d4 varian 400

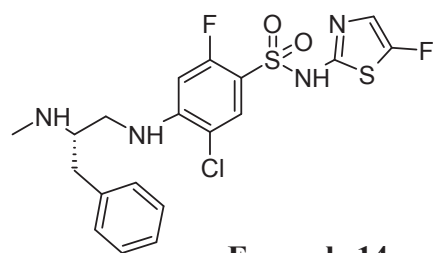

Example 14

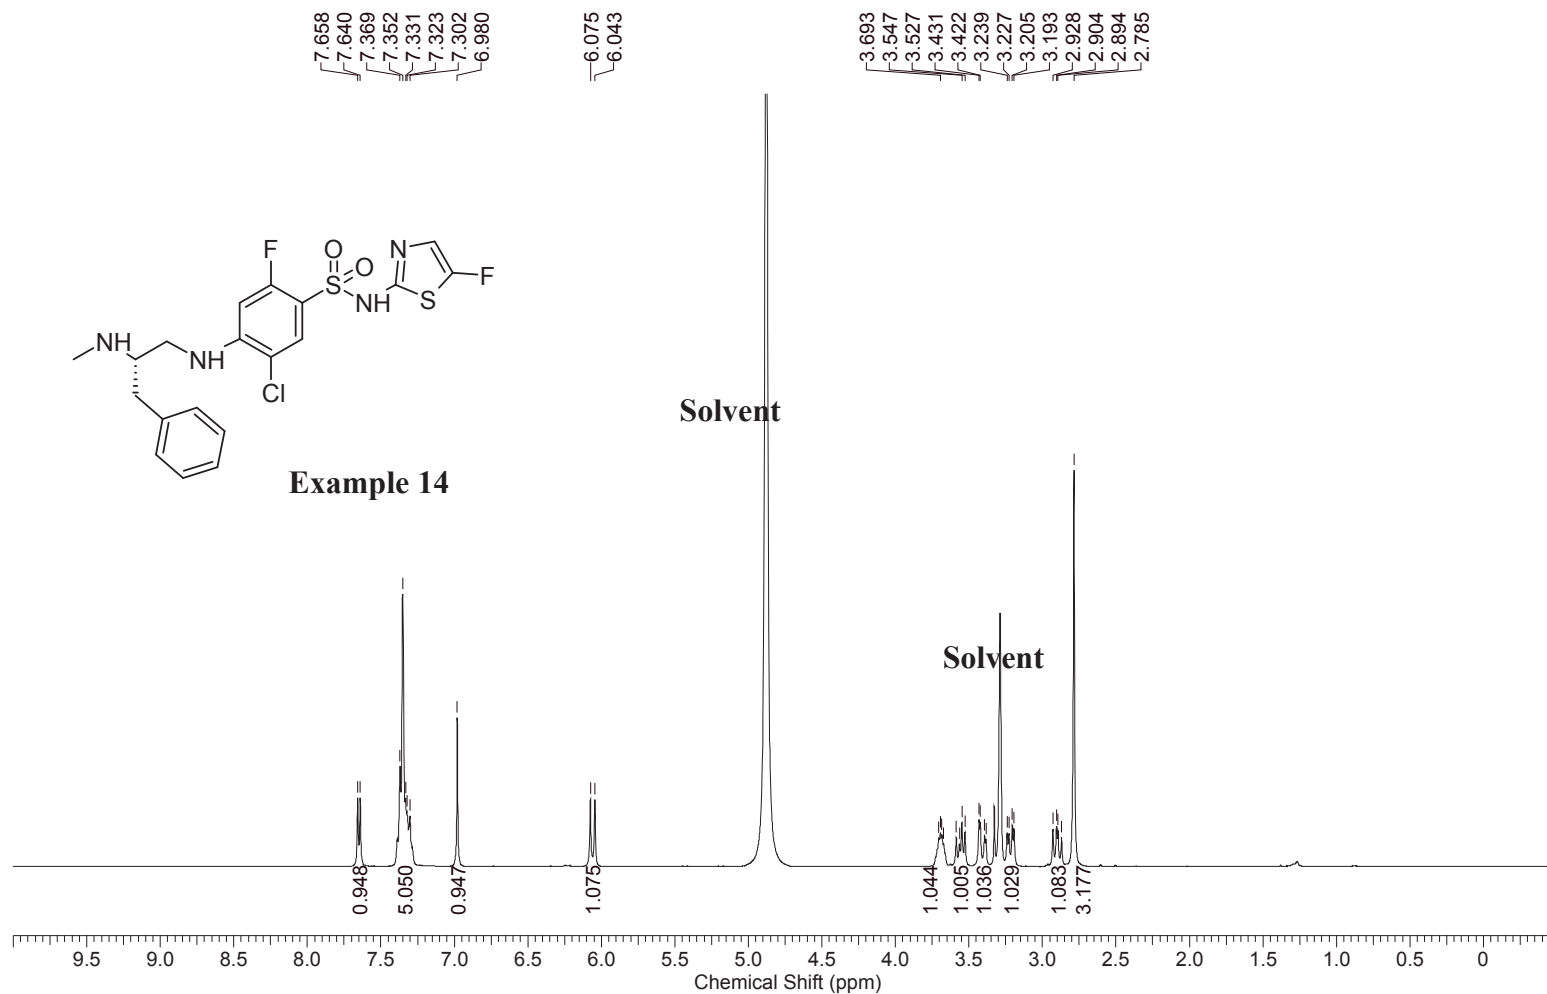

Acquisition Time (sec) 2.0486  
Comment J000335354  
4  
0365308-0  
09-1  
Methanol-  
d4 varian  
400  
Date Aug 7  
2014  
Frequency (MHz) 399.88  
Nucleus 1H  
Number of Transients 8  
Original Points Count 13132  
Points Count 16384  
Pulse Sequence s2pul  
Receiver Gain 38.00  
Solvent METHAN  
OL-d4  
Spectrum Offset (Hz) 2399.2805  
Spectrum Type STAND  
ARD  
Sweep Width (Hz) 6410.26  
Temperature (degree C) AMBIENT  
TEMPER  
ATURE

Operator:

Date:

=====  
 Injection Date : Wed, 6. Aug. 2014  
 Acq Operator : AL260  
 Location : P1-B-02  
 Inj. Vol. : 1.0ul  
 Acq Method : C:\CHEM32\1\METHODS\WUXIAB10.M  
 Data Filename : K:\140806AG\AGH61BB1.D  
 LC-MS

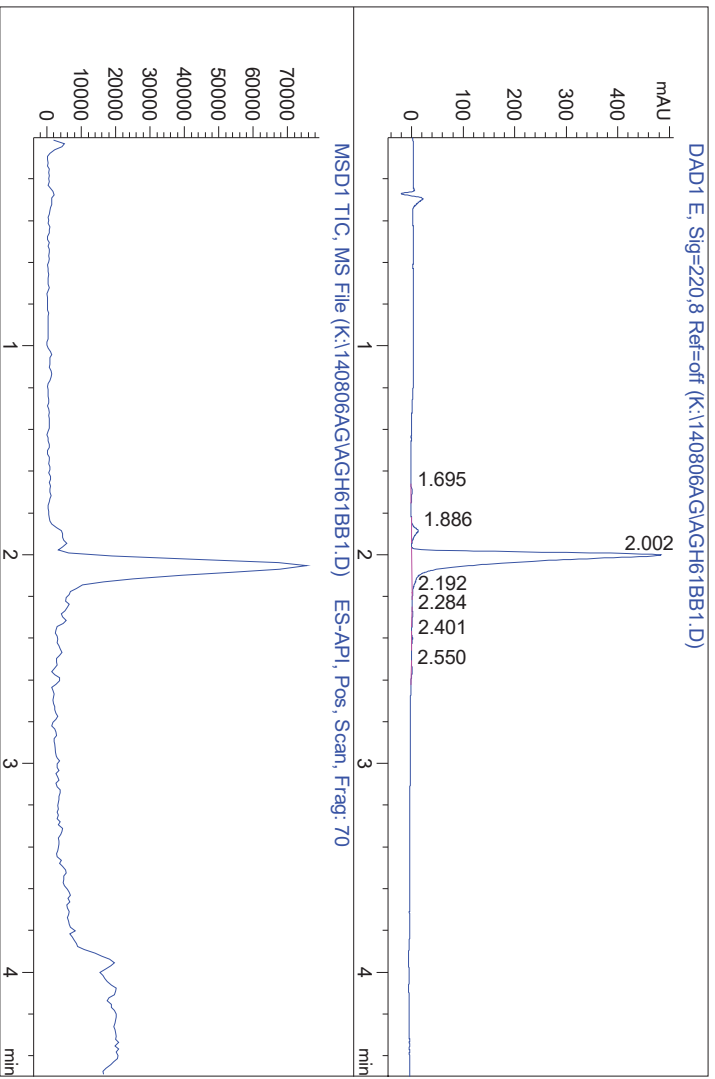

=====  
 Report  
 =====

Signal 1 : DAD1 E, Sig=220,8 Ref=off

| Peak # | RT [min] | Area     | Height  | Height % | Width [min] | Area % |
|--------|----------|----------|---------|----------|-------------|--------|
| 1      | 1.695    | 6.824    | 2.569   | 0.507    | 0.038       | 0.452  |
| 2      | 1.886    | 33.430   | 13.134  | 2.593    | 0.042       | 2.213  |
| 3      | 2.002    | 1455.265 | 484.437 | 95.646   | 0.050       | 96.343 |
| 4      | 2.192    | 1.437    | 0.983   | 0.194    | 0.024       | 0.095  |
| 5      | 2.284    | 4.045    | 1.501   | 0.296    | 0.040       | 0.268  |
| 6      | 2.401    | 3.489    | 1.818   | 0.359    | 0.031       | 0.231  |
| 7      | 2.550    | 6.023    | 2.046   | 0.404    | 0.045       | 0.399  |

\*MSD1 SPC, time=2.054:2.069 of K:\140806AG\AGH61BB1.D

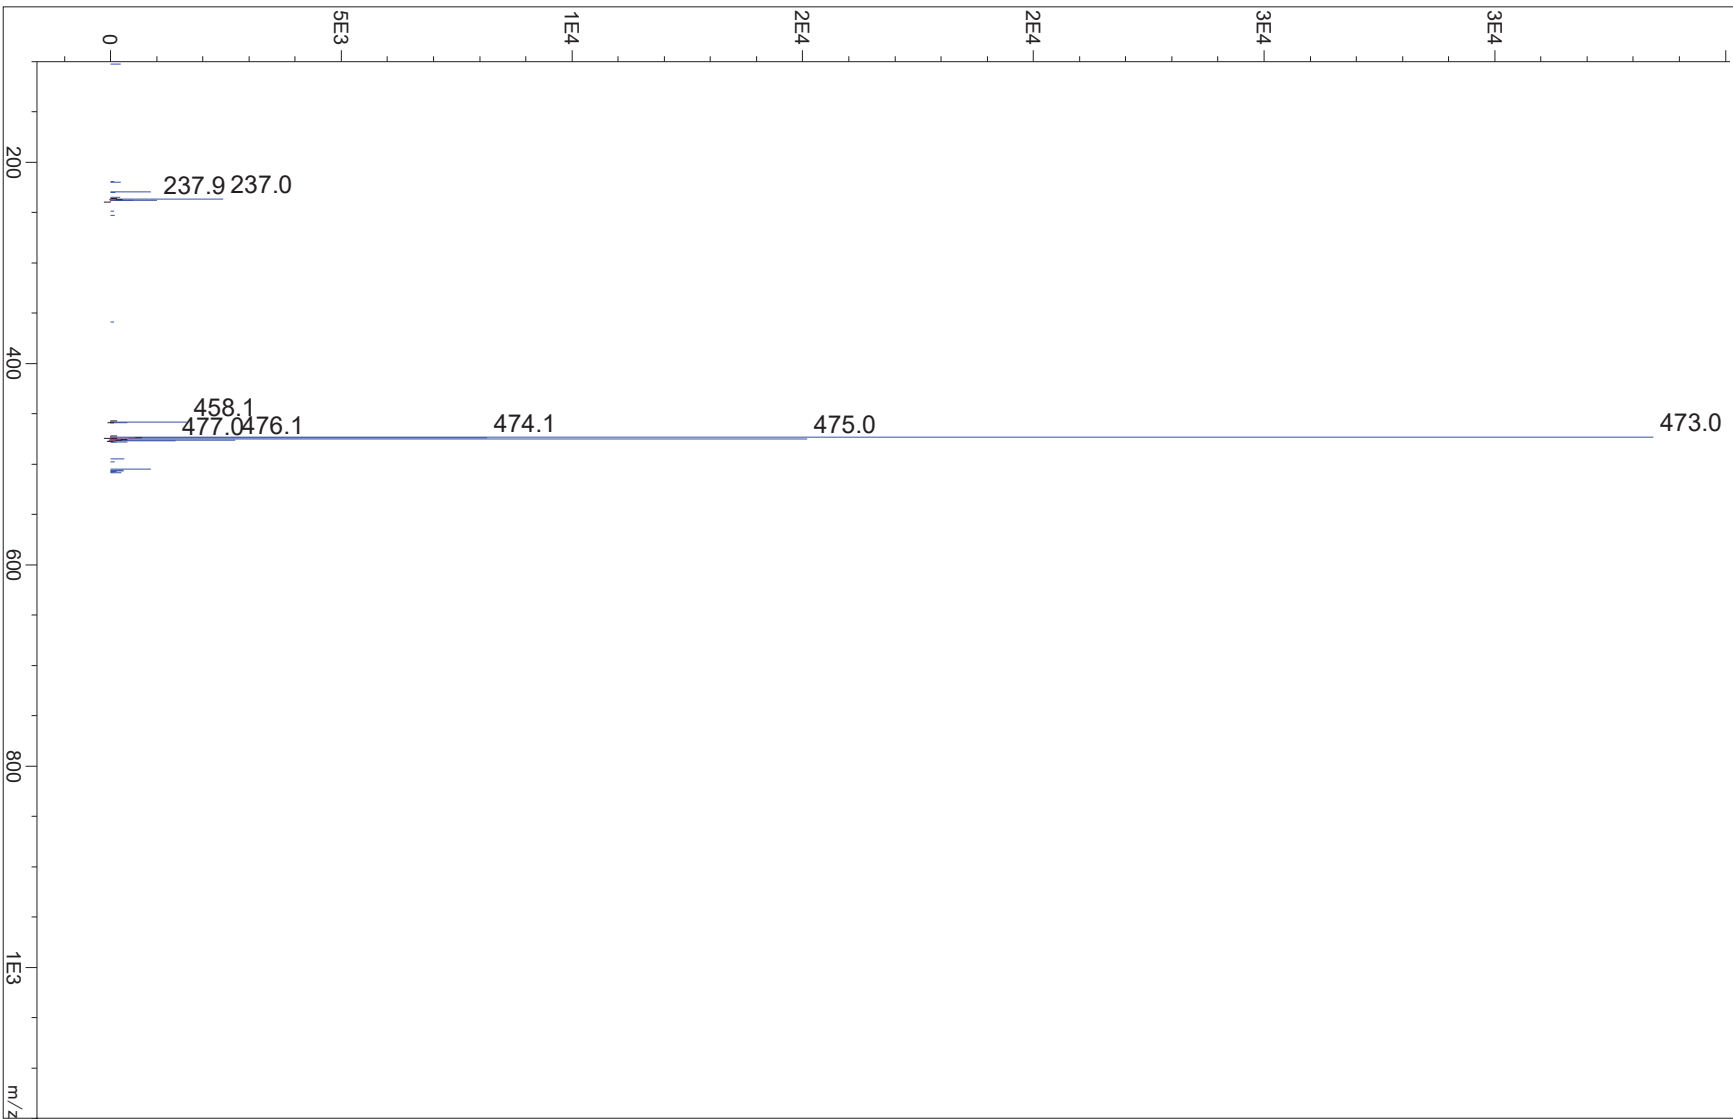

\*MSD1 SPC, time=1.931:1.962 of K:\140806AG\AGH61BB1.D

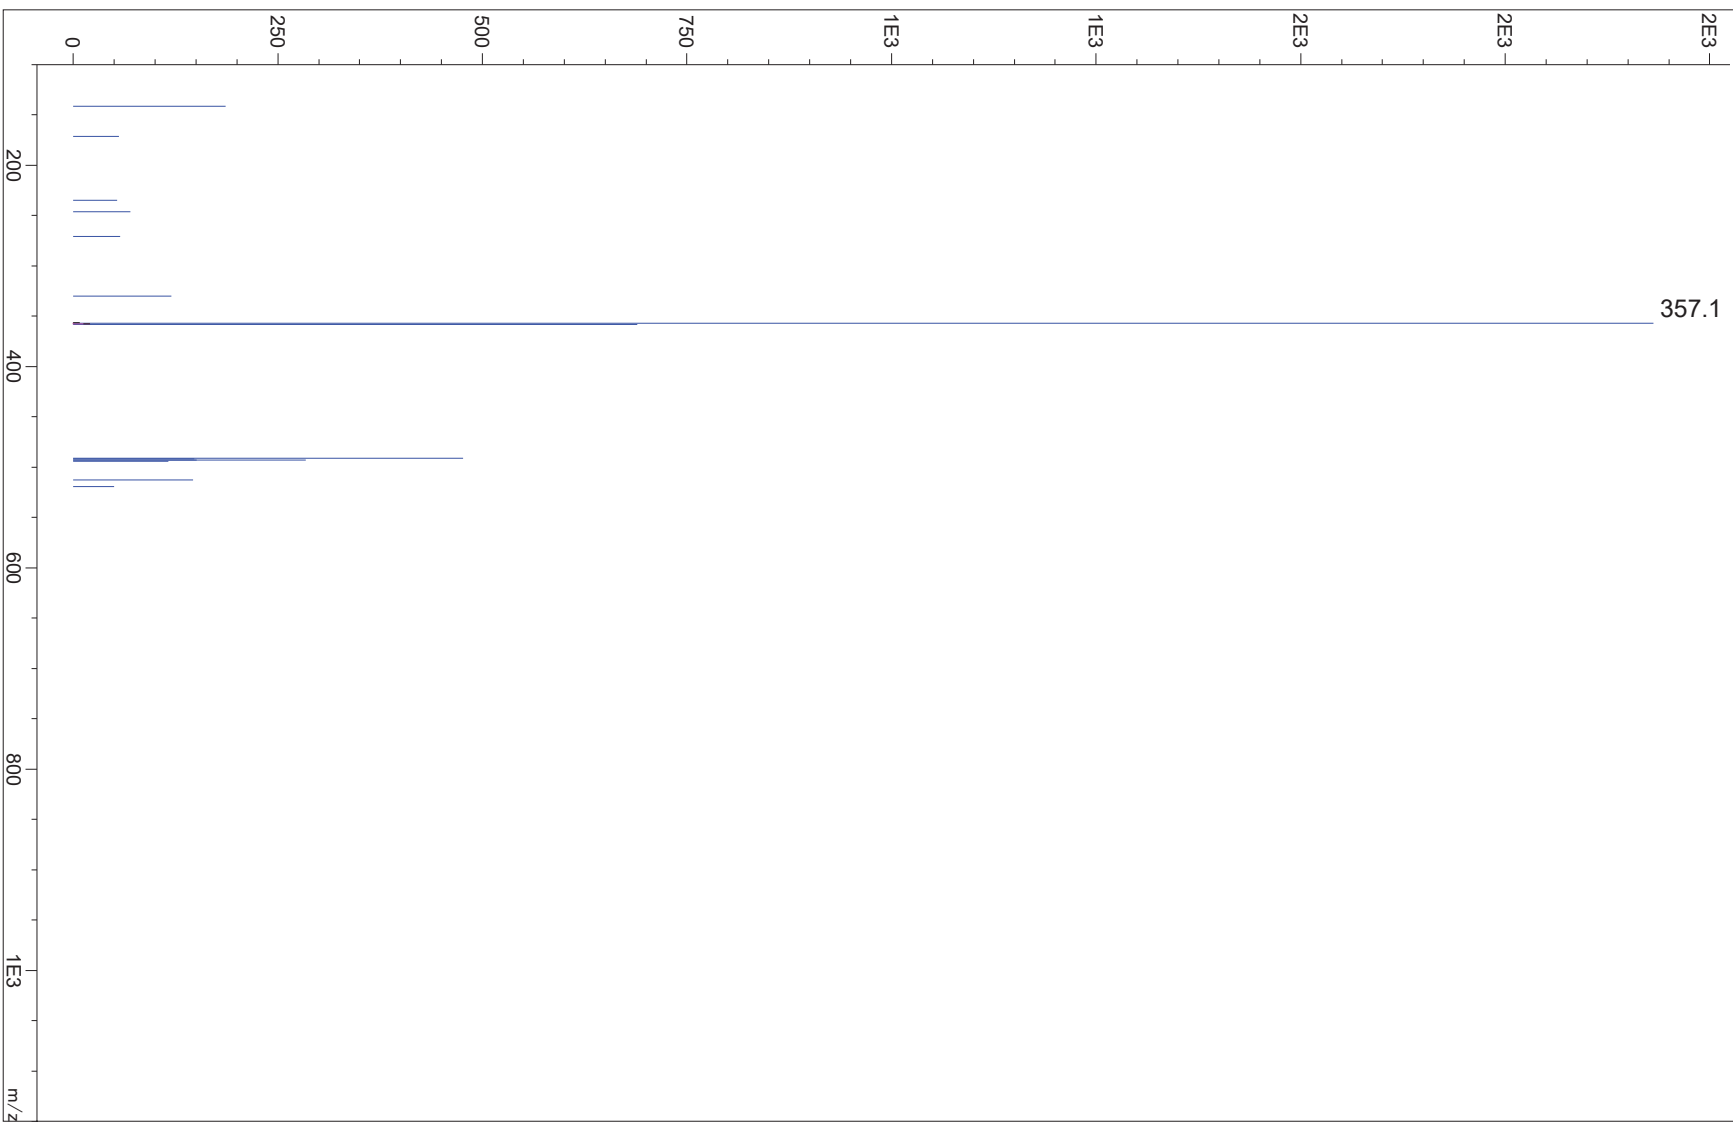

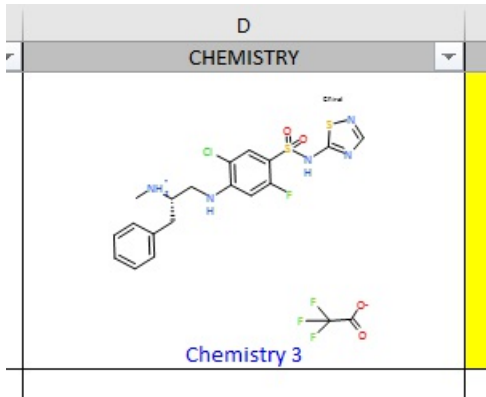

EXAMPLE 15:  
0347710-0082-008

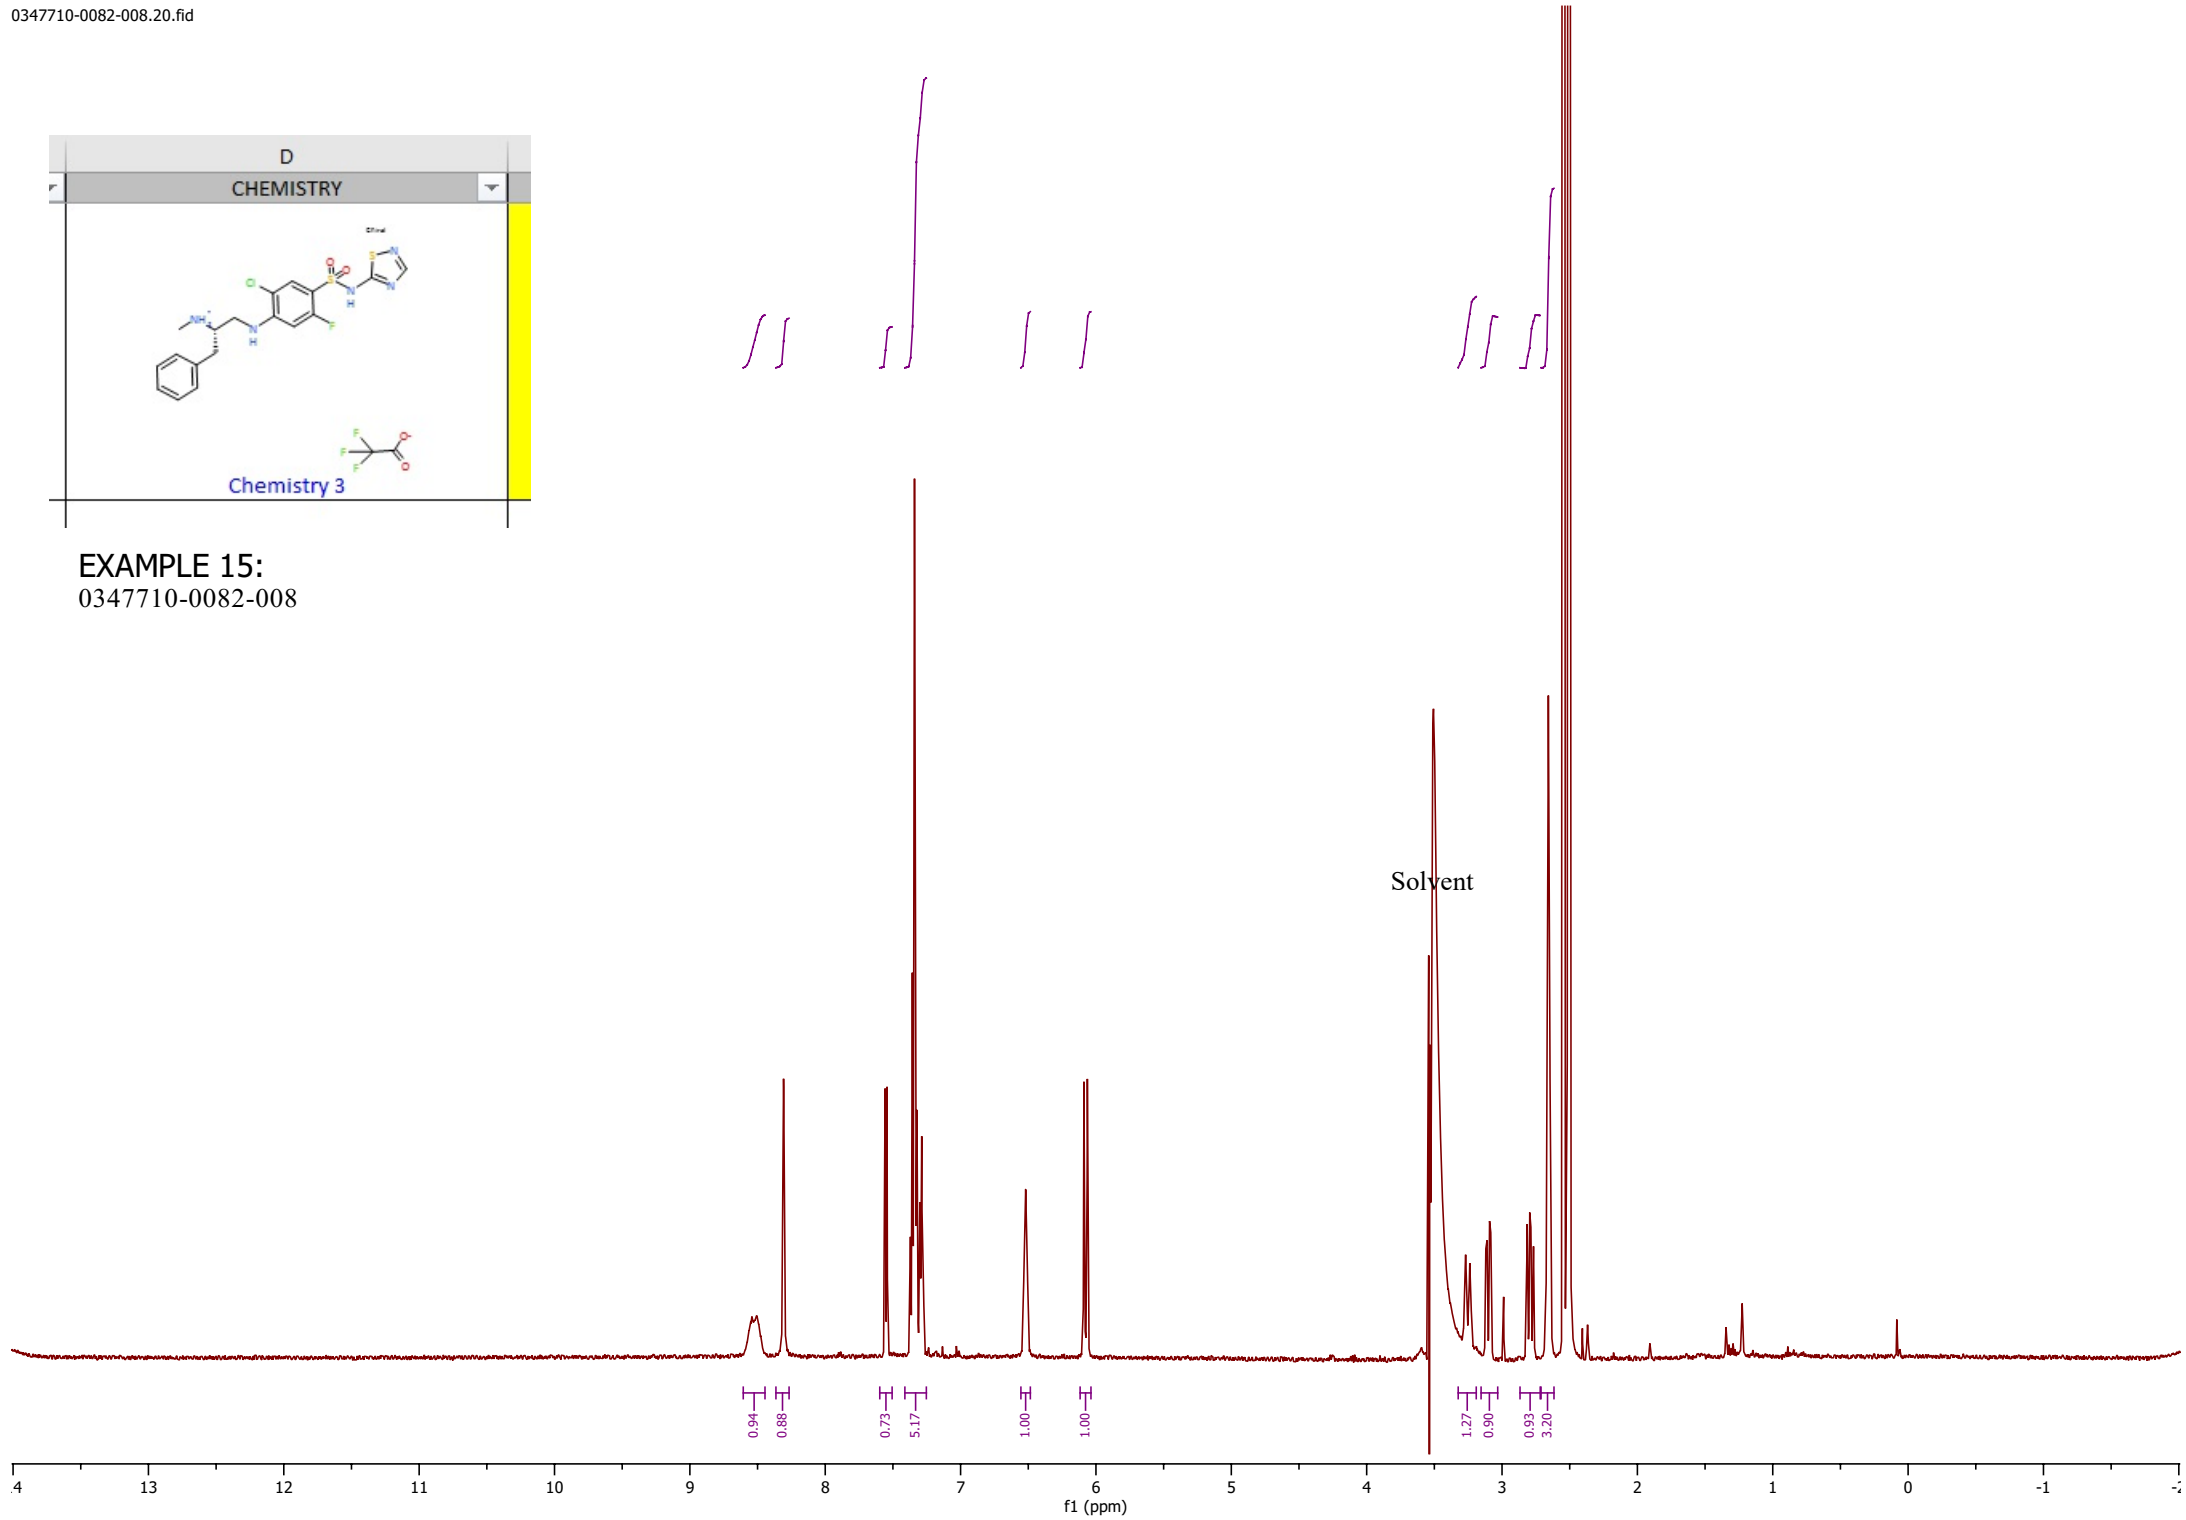

Openlynx Report - zartmac

Sample: 13  
 File:14625-13  
 Description:UPLC PURITY 2 MIN - 1ST REG

Vial:4:1,B  
 Date:31-Jan-2014

ID:0347710-0082-008-1  
 Time:09:47:31

Printed: Tue Feb 18 13:12:09 2014

Sample Report (continued):

Sample 13 Vial 4:1,B ID 0347710-0082-008-1 File 14625-13 Date 31-Jan-2014 Time 09:47:31 Description UPLC PURITY 2 MIN - 1ST REG

1: MS ES+ :TIC Smooth (Mn, 1x2)

3.9e+007

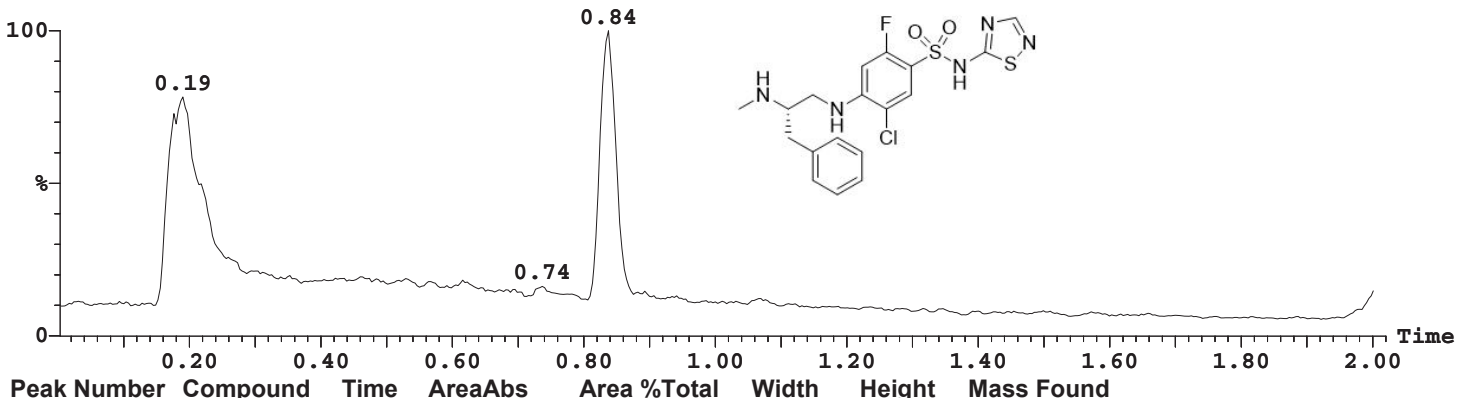

1: MS ES+ :478.065+456.065 Smooth (SG, 2x2)

1.4e+007

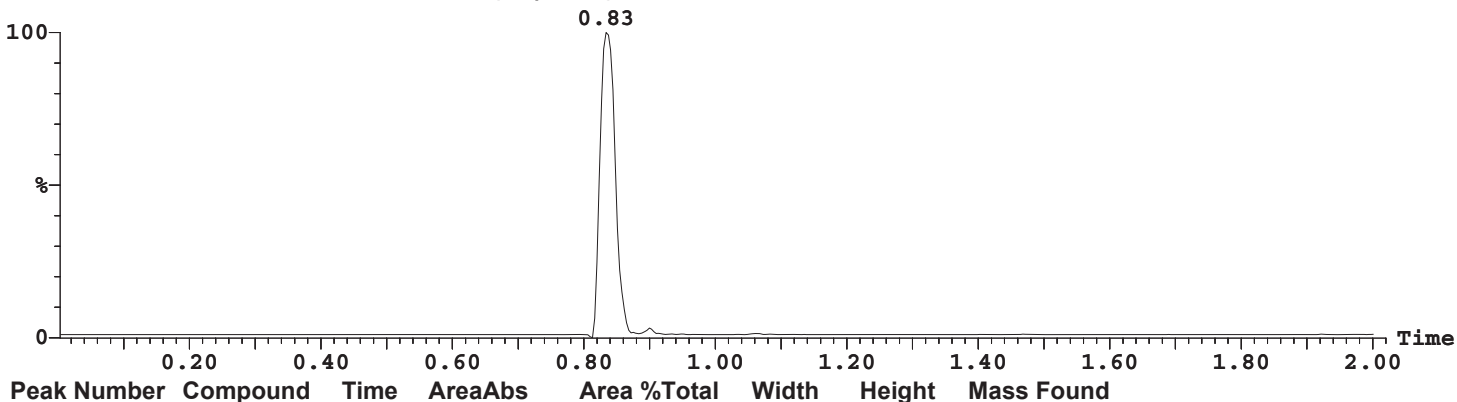

2: DAD: TIC Smooth (Mn, 1x2)

2.2e+006

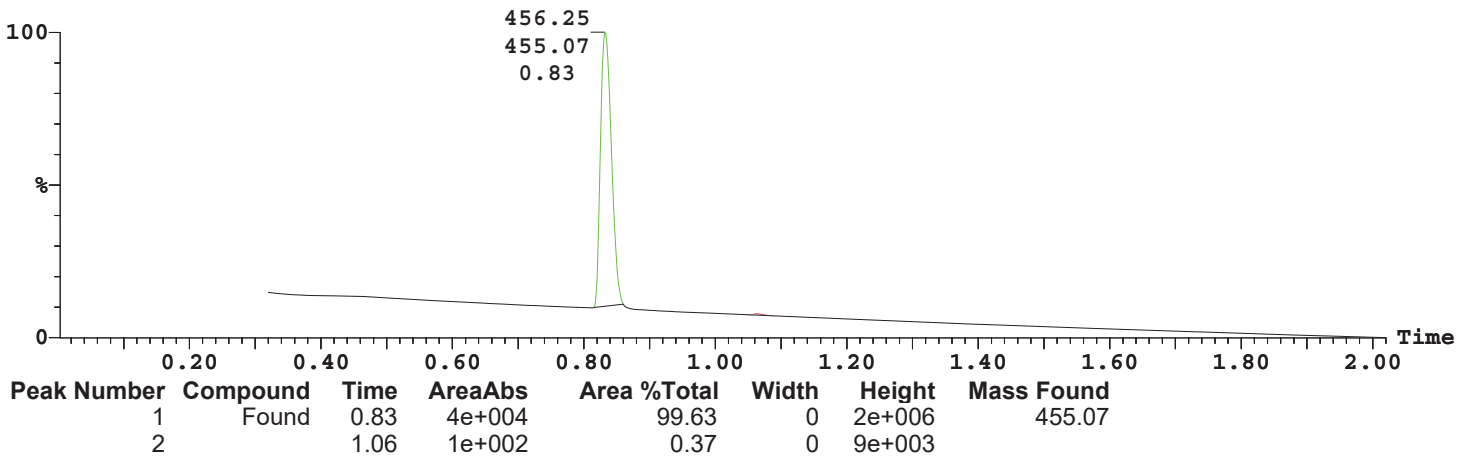

Sample: 13  
File:14625-13  
Description:UPLC PURITY 2 MIN - 1ST REG

Vial:4:1,B  
Date:31-Jan-2014

ID:0347710-0082-008-1  
Time:09:47:31

Printed: Tue Feb 18 13:12:09 2014

Sample Report (continued):

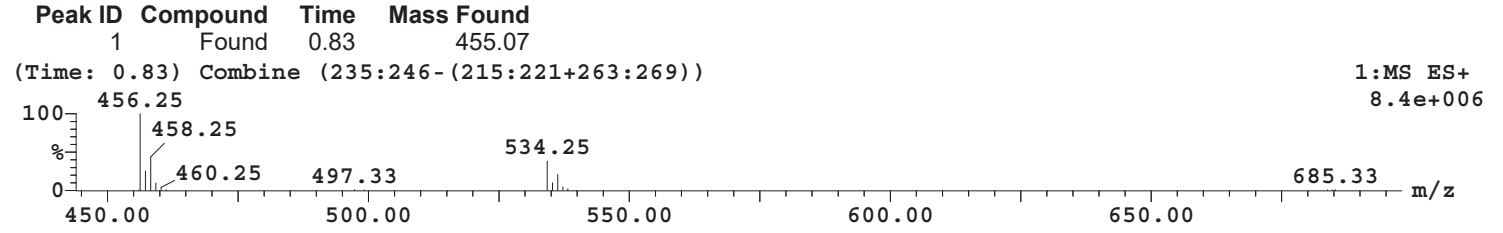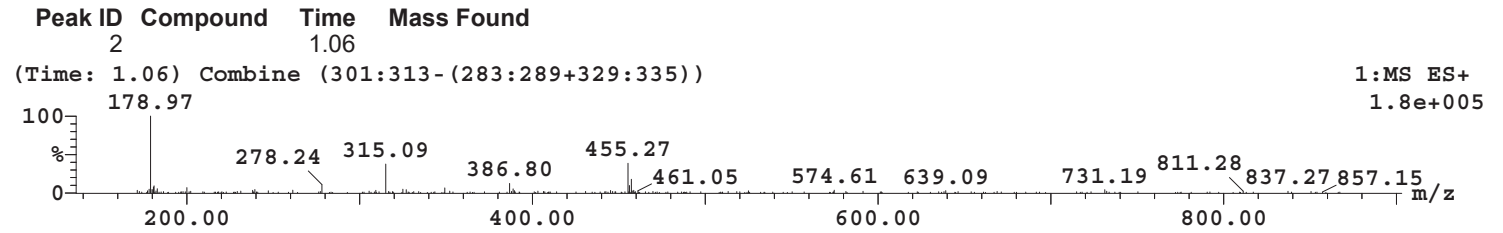



Compound ID: EBR0084\_C1871\_B\_001

Z000001829 0365754-0111-1 Methanol-d4 400MHz

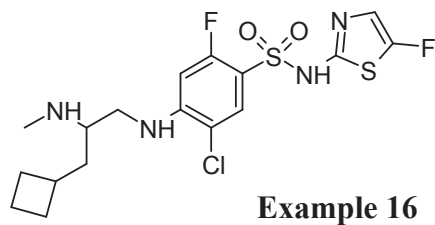

Example 16

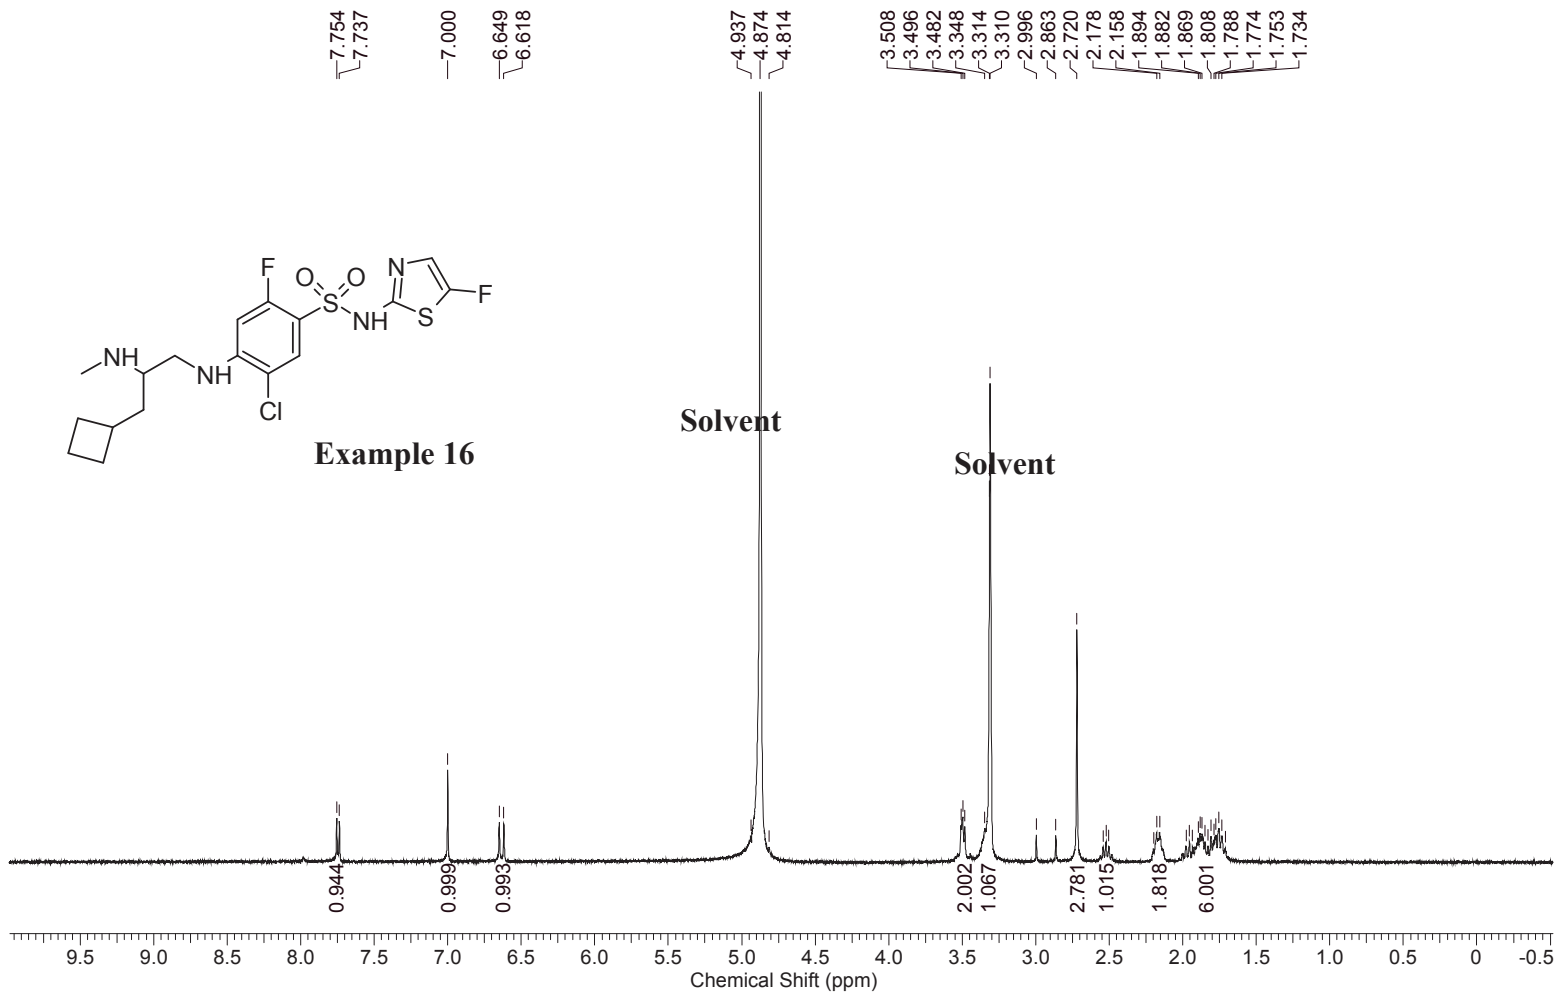

|                        |                                                       |
|------------------------|-------------------------------------------------------|
| Acquisition Time (sec) | 1.9923                                                |
| Comment                | Z000001829<br>0365754-0111-1<br>Methanol-d4<br>400MHz |
| Date                   | 11 Nov 2014<br>15:34:24                               |
| Frequency (MHz)        | 400.13                                                |
| Nucleus                | 1H                                                    |
| Number of Transients   | 8                                                     |
| Origin                 | spect                                                 |
| Original Points Count  | 16384                                                 |
| Owner                  | nmrsu                                                 |
| Points Count           | 32768                                                 |
| Pulse Sequence         | zg30                                                  |
| Receiver Gain          | 362.00                                                |
| SW(cyclical) (Hz)      | 8223.68                                               |
| Solvent                | METHANOL-d4                                           |
| Spectrum Offset (Hz)   | 2463.6948                                             |
| Spectrum Type          | STANDARD                                              |
| Sweep Width (Hz)       | 8223.43                                               |
| Temperature (degree C) | 27.000                                                |

Operator:

Date:

```

=====
Injection Date   : Thu, 13. Nov. 2014
Acq Operator    : AL260
Location        : P1-B-02
Inj. Vol.       : 1.0 u1
Acq Method      : C:\CHEM32\1\METHODS\WUXIAB10.M
Data Filename   : K:\141113AG\AGKD1BB1.D
LC-MS
    
```

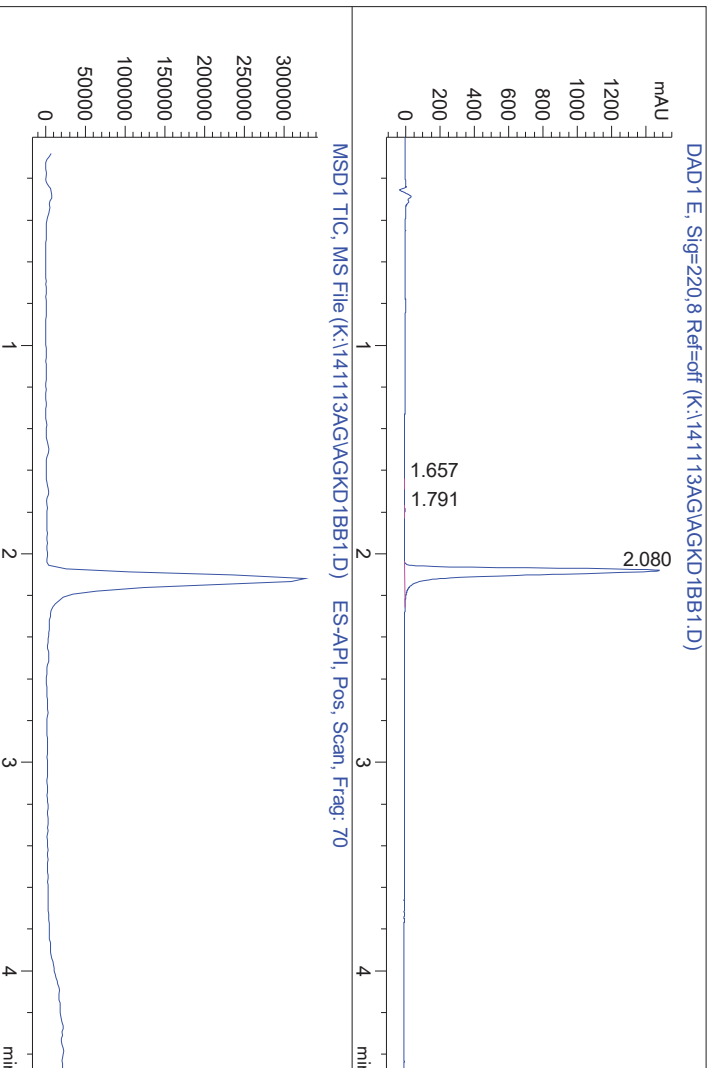

Report

```

=====
Signal 1 : DAD1 E, Sig=220.8 Ref=off
=====

```

| Peak # | RT [min] | Area     | Height   | Height % | Width [min] | Area % |
|--------|----------|----------|----------|----------|-------------|--------|
| 1      | 1.657    | 1.298    | 1.062    | 0.071    | 0.019       | 0.039  |
| 2      | 1.791    | 3.285    | 2.180    | 0.146    | 0.023       | 0.098  |
| 3      | 2.080    | 3358.852 | 1485.344 | 99.782   | 0.035       | 99.864 |

```

=====

```

\*MSD1 SPC, time=2.1172.133 of K:\14113AG\AGKD\BB1.D

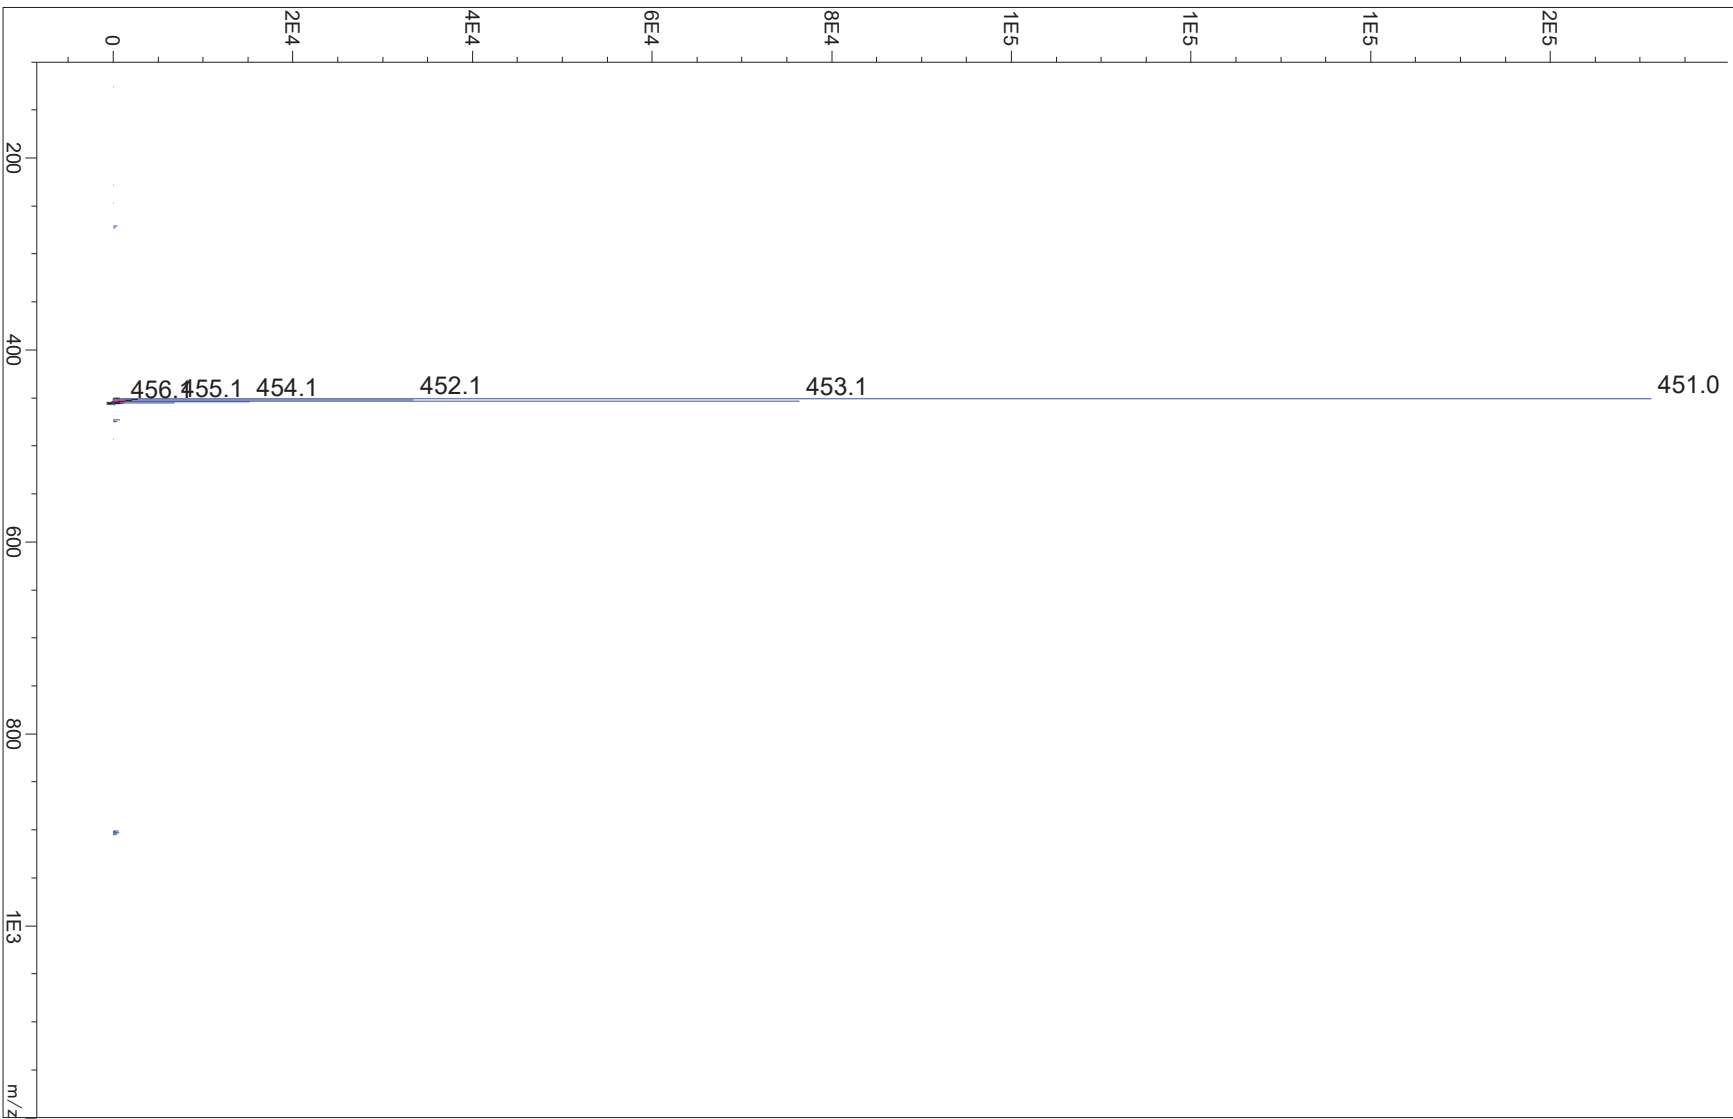

Confidential. For research only NOT for regulatory filing

# SFC CHIRAL REPORT

## SAMPLE INFORMATION

Sample Name: 0365754-01111-1\_E1  
Compound ID: 0365754-01111-1  
Acq. Method Set: AD\_3\_EIOH\_DEA\_25\_3ML  
Channel Name: PDA Ch1 220nm@4.8nm -Compens.  
Proc. Chnl. Descr.: PDA Ch1 220nm@4.8nm -Compens.  
Date Acquired: 11/12/2014 2:13:56 PM CST  
Date Processed: 11/12/2014 2:40:53 PM CST

Acquired By: System  
Sample Set Name: 11111\_2  
Vial: 1:B,7  
Injection Volume: 5.00 ul  
Run Time: 10.0 Minutes

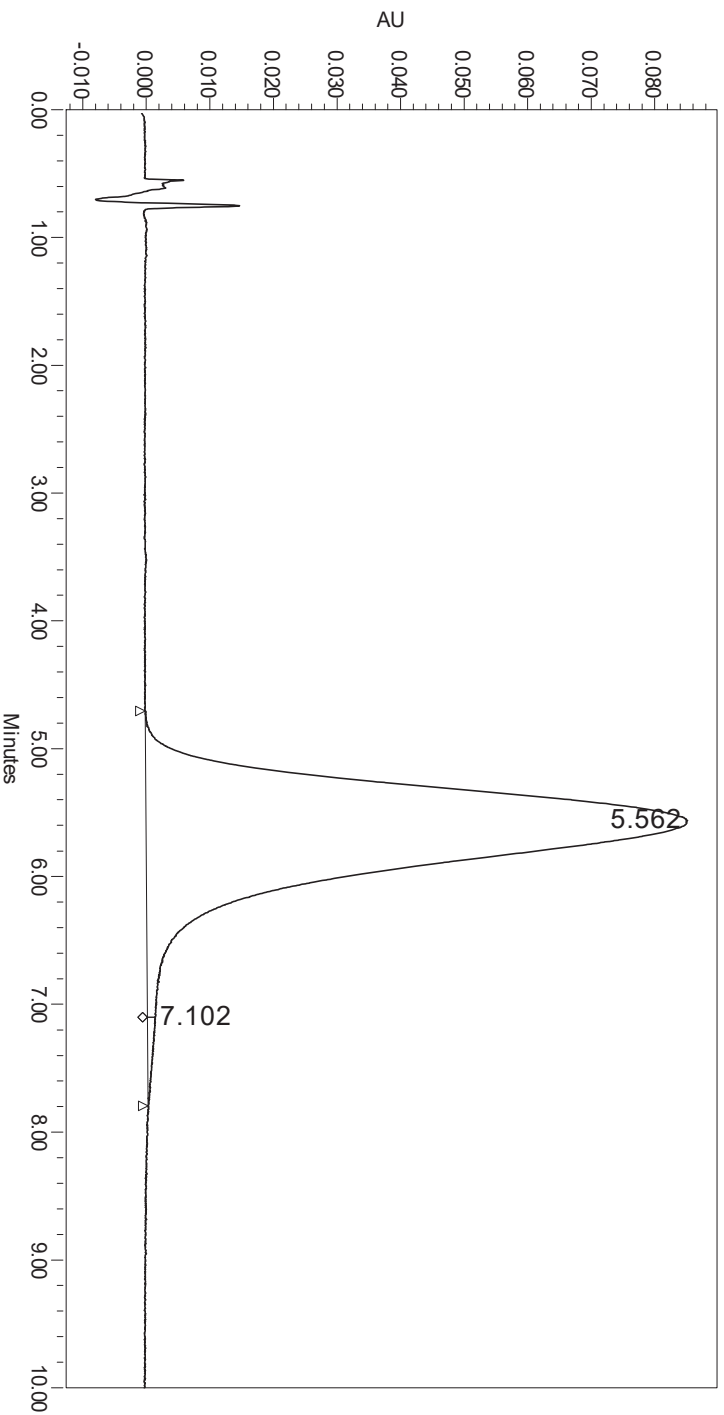

| RT | Area  | % Area  |       |
|----|-------|---------|-------|
| 1  | 5.562 | 3587226 | 99.21 |
| 2  | 7.102 | 28501   | 0.79  |

Operator: \_\_\_\_\_

Date: \_\_\_\_\_

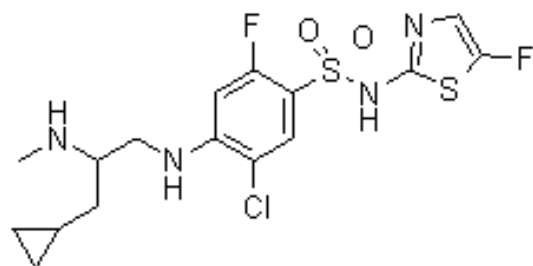

Example 17

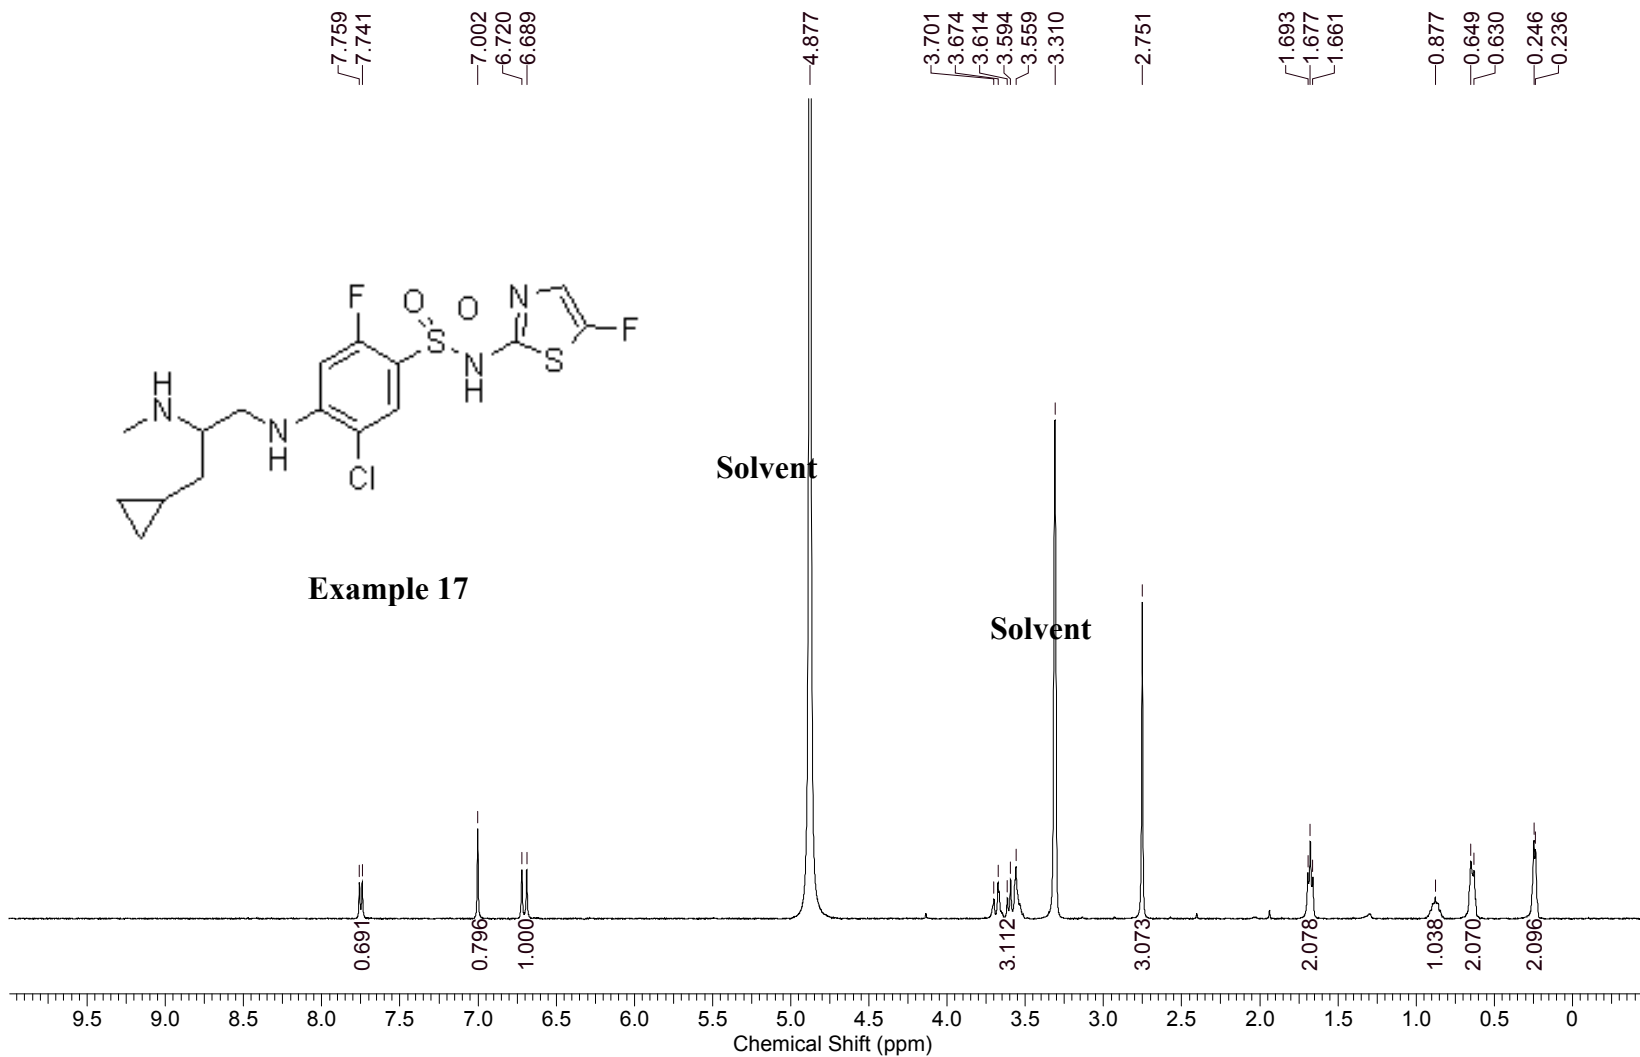

|                        |                                                    |
|------------------------|----------------------------------------------------|
| Acquisition Time (sec) | 2.2688                                             |
| Comment                | 1000217-0<br>60-1AA<br>MeOD<br>Varian_G_<br>400MHz |
| Date                   | Sep 23<br>2015                                     |
| Frequency (MHz)        | 399.74                                             |
| Nucleus                | 1H                                                 |
| Number of Transients   | 8                                                  |
| Original Points Count  | 16393                                              |
| Points Count           | 32768                                              |
| Pulse Sequence         | s2pul                                              |
| Receiver Gain          | 42.00                                              |
| Solvent                | METHAN<br>OL-d4                                    |
| Spectrum Offset (Hz)   | 2800.6741                                          |
| Spectrum Type          | STANDA<br>RD                                       |
| Sweep Width (Hz)       | 7225.43                                            |
| Temperature (degree C) | AMBIENT<br>TEMPER<br>ATURE                         |

Operator:

Date:

Compound ID: EBR0084\_C1872\_A\_002

1000217-060-1AA MeOD Varian\_G\_400MHz

--109.945

--155.748

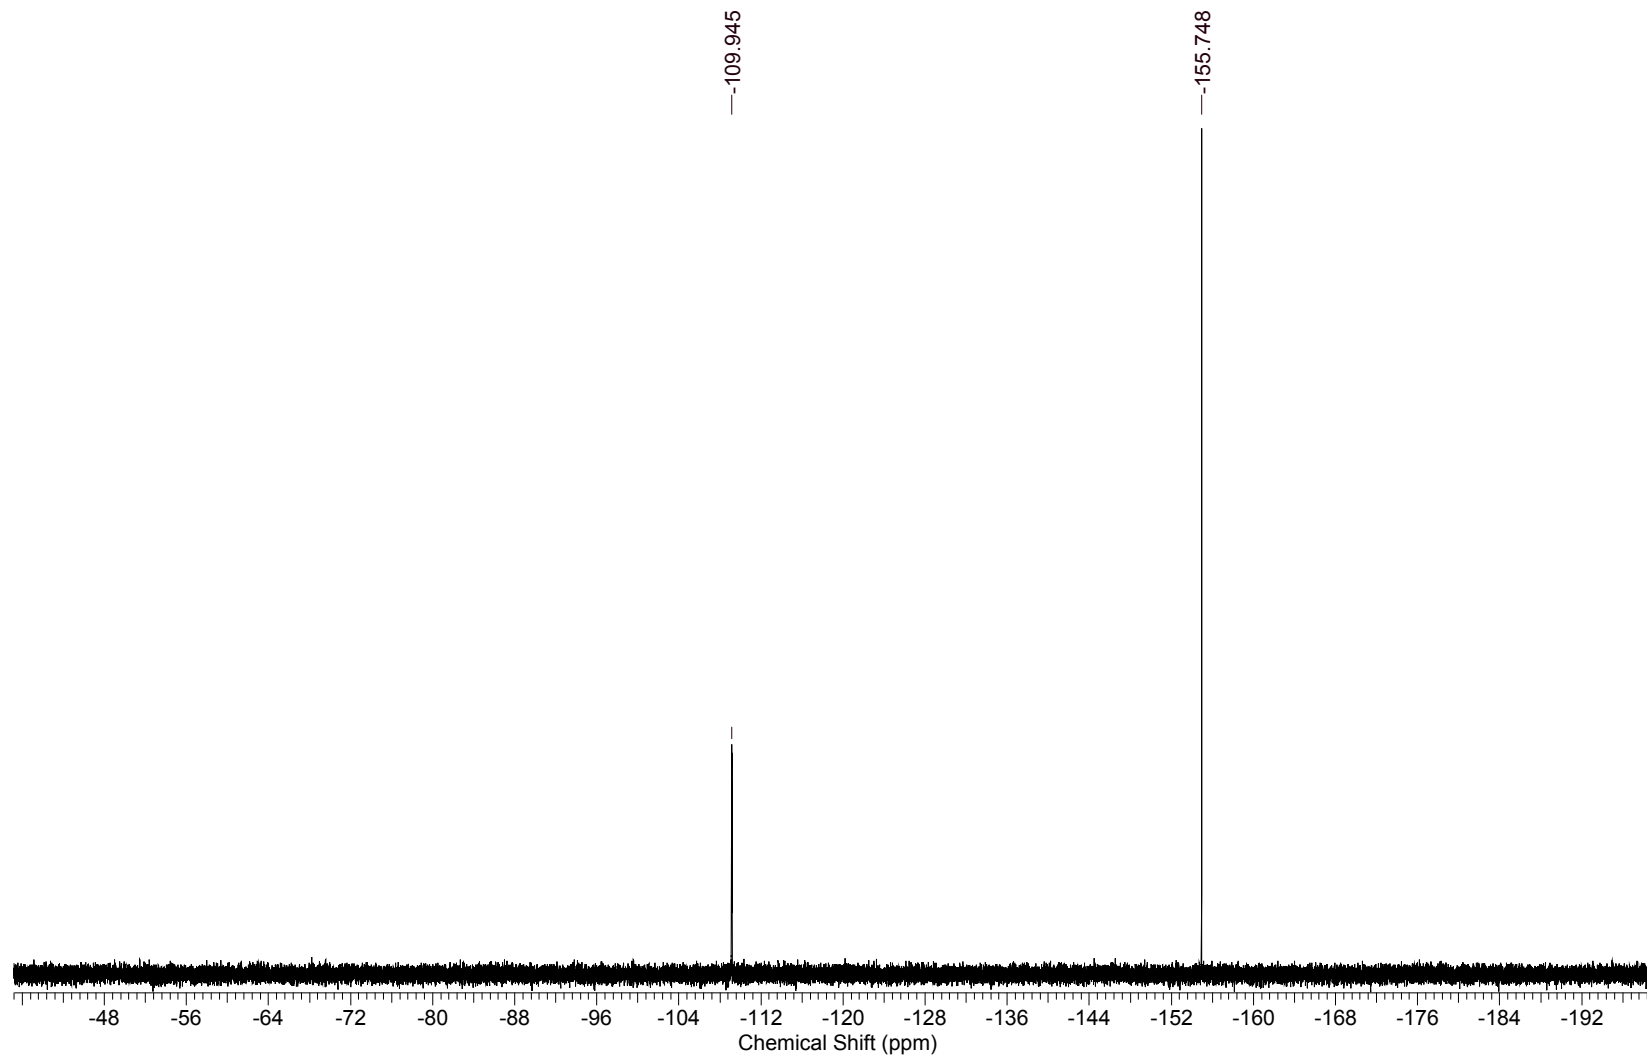

|                        |                                                    |
|------------------------|----------------------------------------------------|
| Acquisition Time (sec) | 1.0000                                             |
| Comment                | 1000217-0<br>60-1AA<br>MeOD<br>Varian_G_<br>400MHz |
| Date                   | Sep 23<br>2015                                     |
| Frequency (MHz)        | 376.08                                             |
| Nucleus                | 19F                                                |
| Number of Transients   | 16                                                 |
| Original Points Count  | 78125                                              |
| Points Count           | 131072                                             |
| Pulse Sequence         | s2pul                                              |
| Receiver Gain          | 58.00                                              |
| Solvent                | METHAN<br>OL-d4                                    |
| Spectrum Offset (Hz)   | -48897.16<br>41                                    |
| Spectrum Type          | STANDA<br>RD                                       |
| Sweep Width (Hz)       | 78125.00                                           |
| Temperature (degree C) | AMBIENT<br>TEMPER<br>ATURE                         |

Operator:

Date:

```

=====
Injection Date   : Thu, 24. Sep. 2015
Acq Operator    : AL260
Location        : P2-C-01
Inj. Vol.       : 1.0 ul
Acq Method      : C:\CHEM32\1\METHODS\WUXIAB10-220.M
Data Filename   : K:\150923A-G\A-GIN2CA1.D
Instrument      : AK
    
```

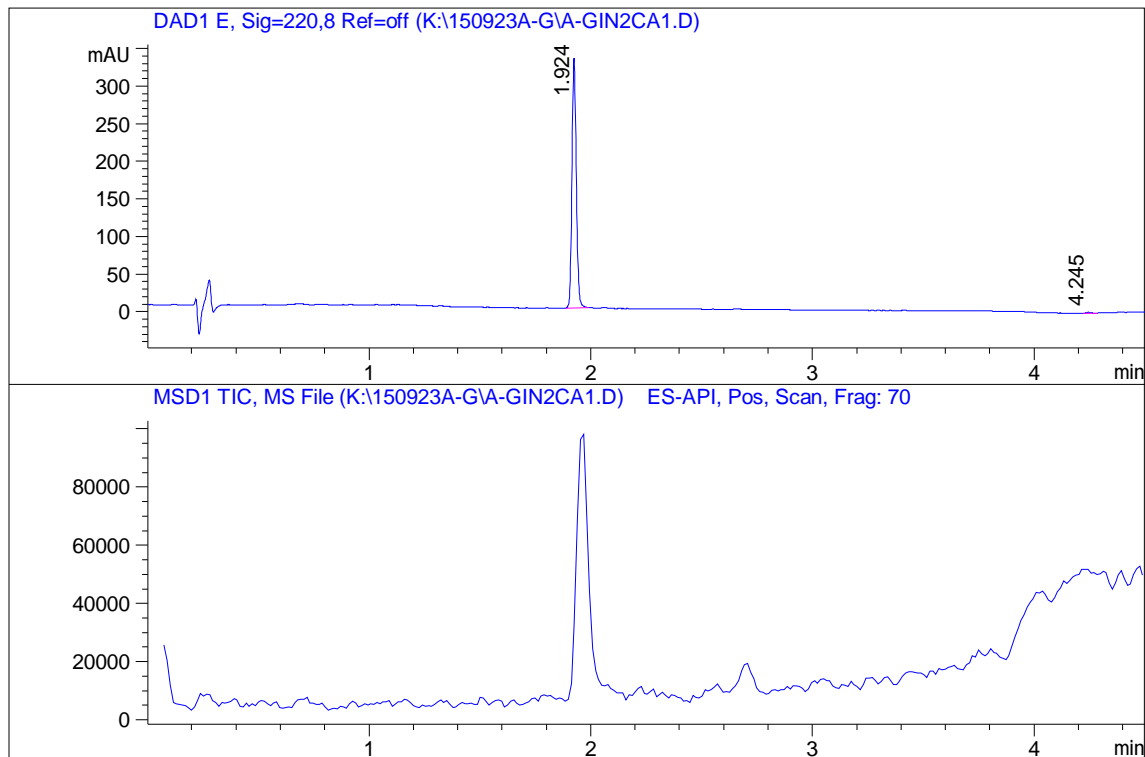

Report

```

=====
Signal 1 : DAD1 E, Sig=220,8 Ref=off
Peak      RT      Height Height %   Width   Area   Area %
#         [min]                [min]
-----
1         1.924    332.402   99.601    0.021  450.535  99.640
2         4.245     1.332    0.399    0.019   1.629   0.360
-----
    
```

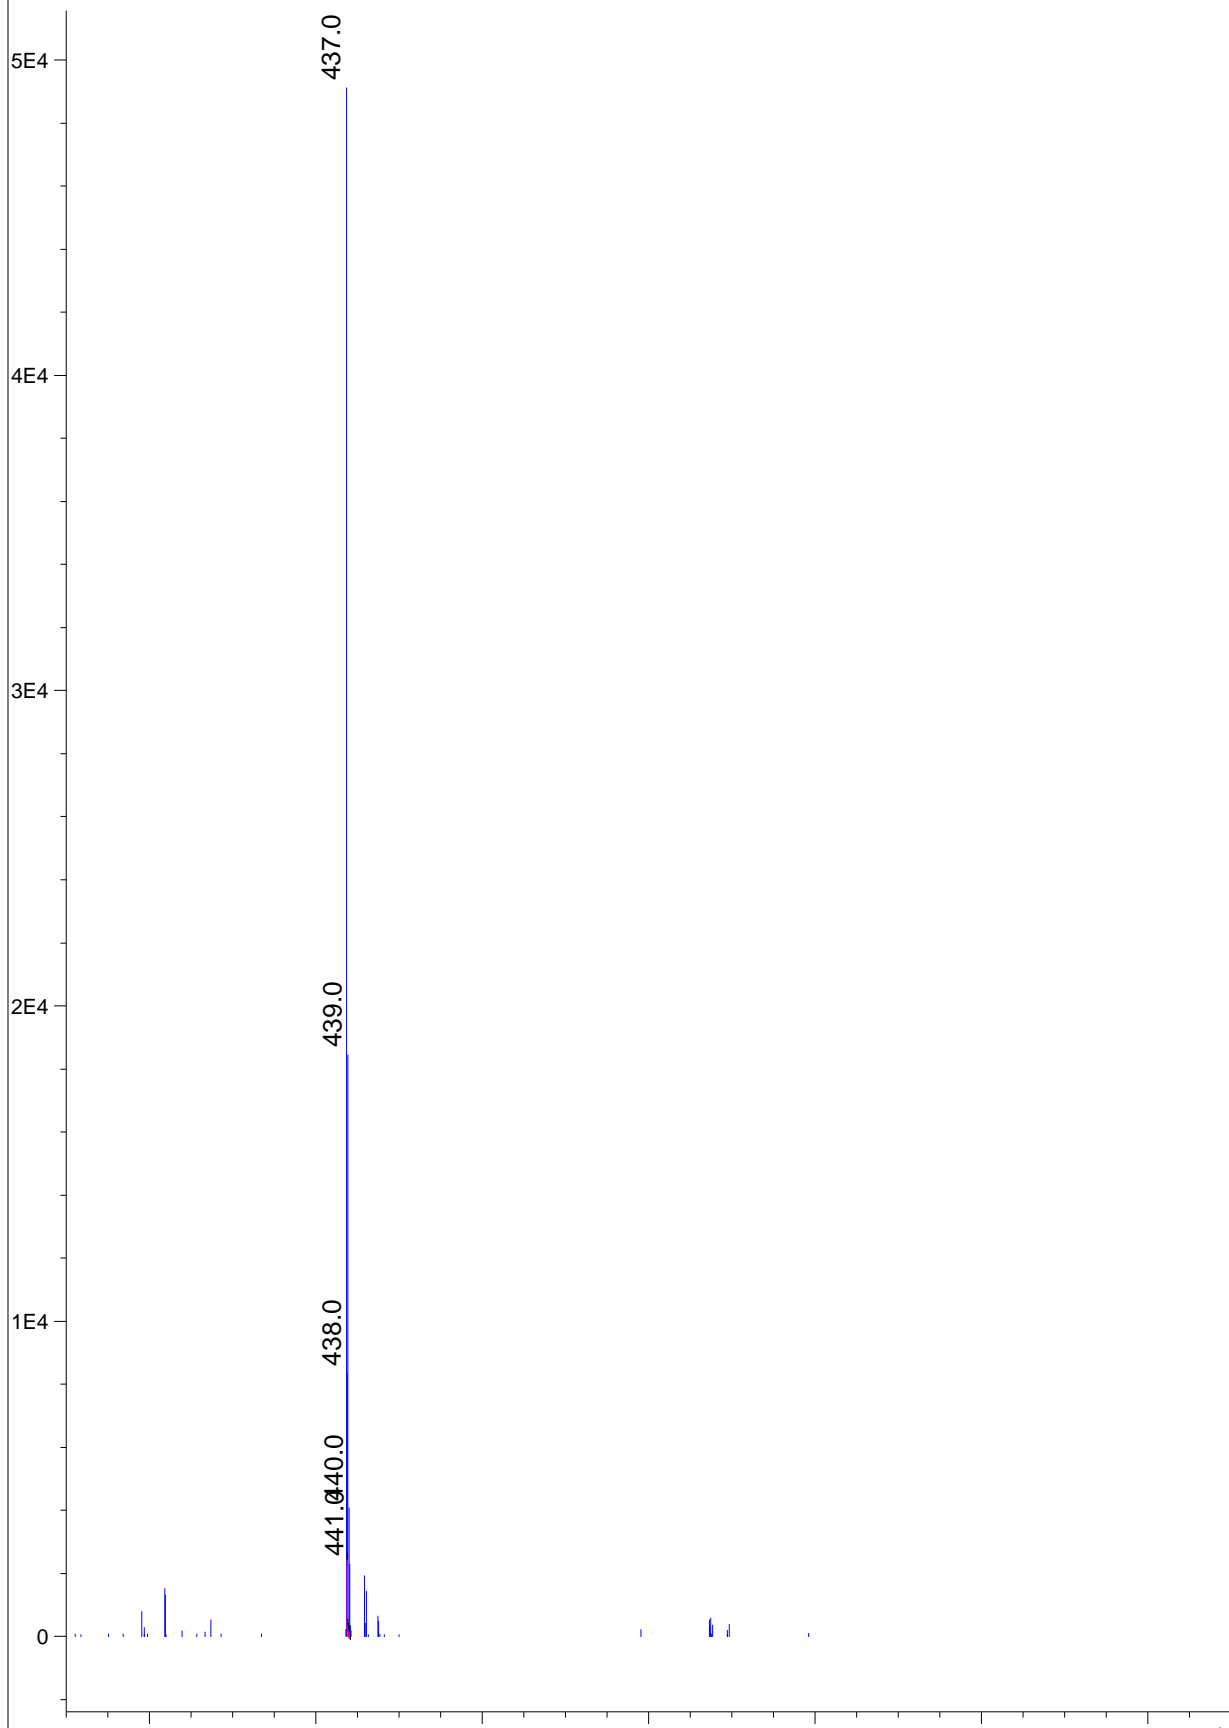



# SFC CHIRAL REPORT

## SAMPLE INFORMATION

|                     |                               |                   |             |
|---------------------|-------------------------------|-------------------|-------------|
| Sample Name:        | 1000217-060-1_E1              | Acquired By:      | System      |
| Compound ID:        | 1000217-060-1                 |                   |             |
| Acq. Method Set:    | AD_3_EtOH_DEA_40_25ML         | Vial:             | 1:A,8       |
| Channel Name:       | PDA Ch1 220nm@4.8nm -Compens. | Injection Volume: | 8.00 ul     |
| Proc. Chnl. Descr.: | PDA Ch1 220nm@4.8nm -Compens. | Run Time:         | 4.0 Minutes |
| Date Acquired:      | 9/22/2015 10:44:10 PM CST     |                   |             |
| Date Processed:     | 9/23/2015 10:37:29 AM CST     |                   |             |

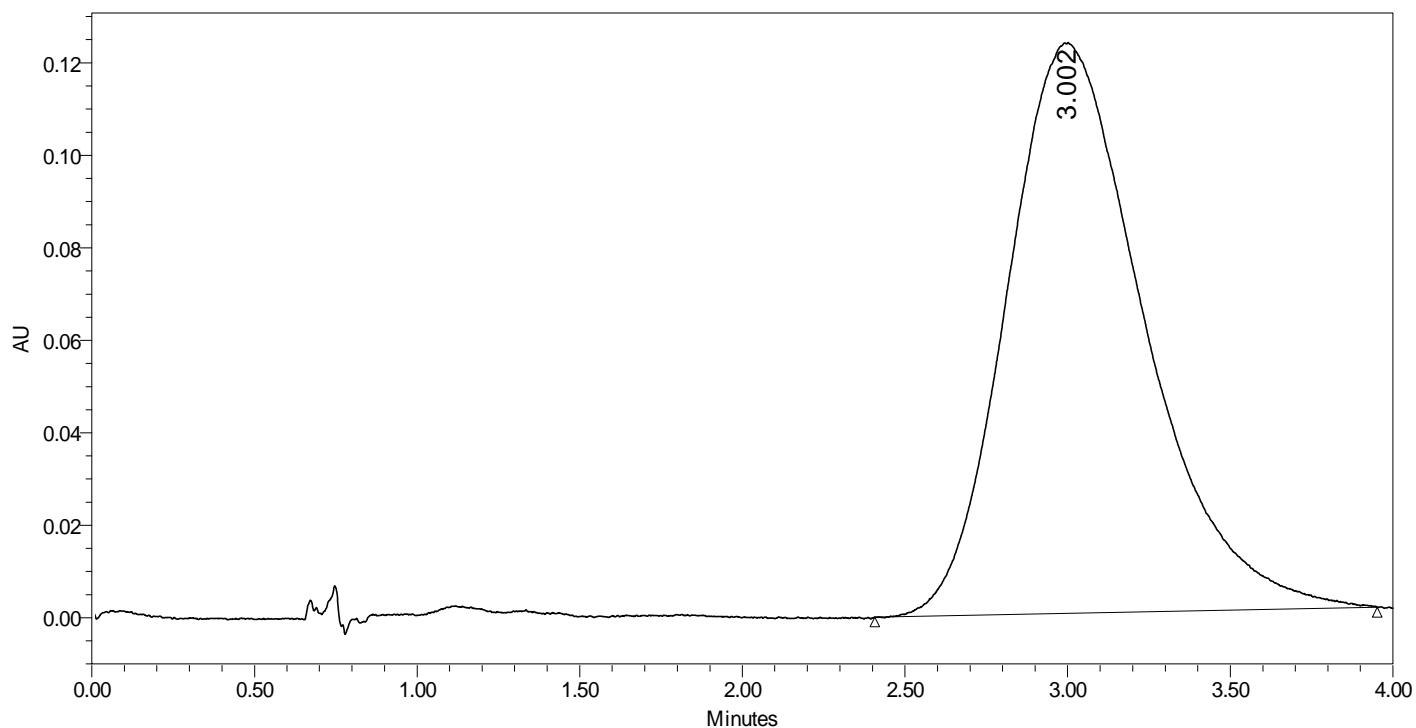

|   | RT    | Area    | % Area |
|---|-------|---------|--------|
| 1 | 3.002 | 3606087 | 100.00 |

Operator: \_\_\_\_\_

Date: \_\_\_\_\_

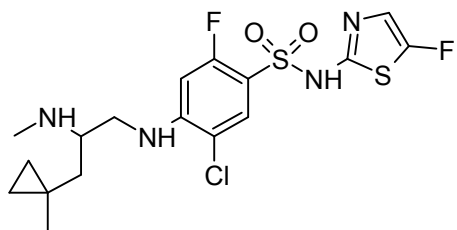

Example 18

Solvent

Solvent

Supervisor: Tao Guo

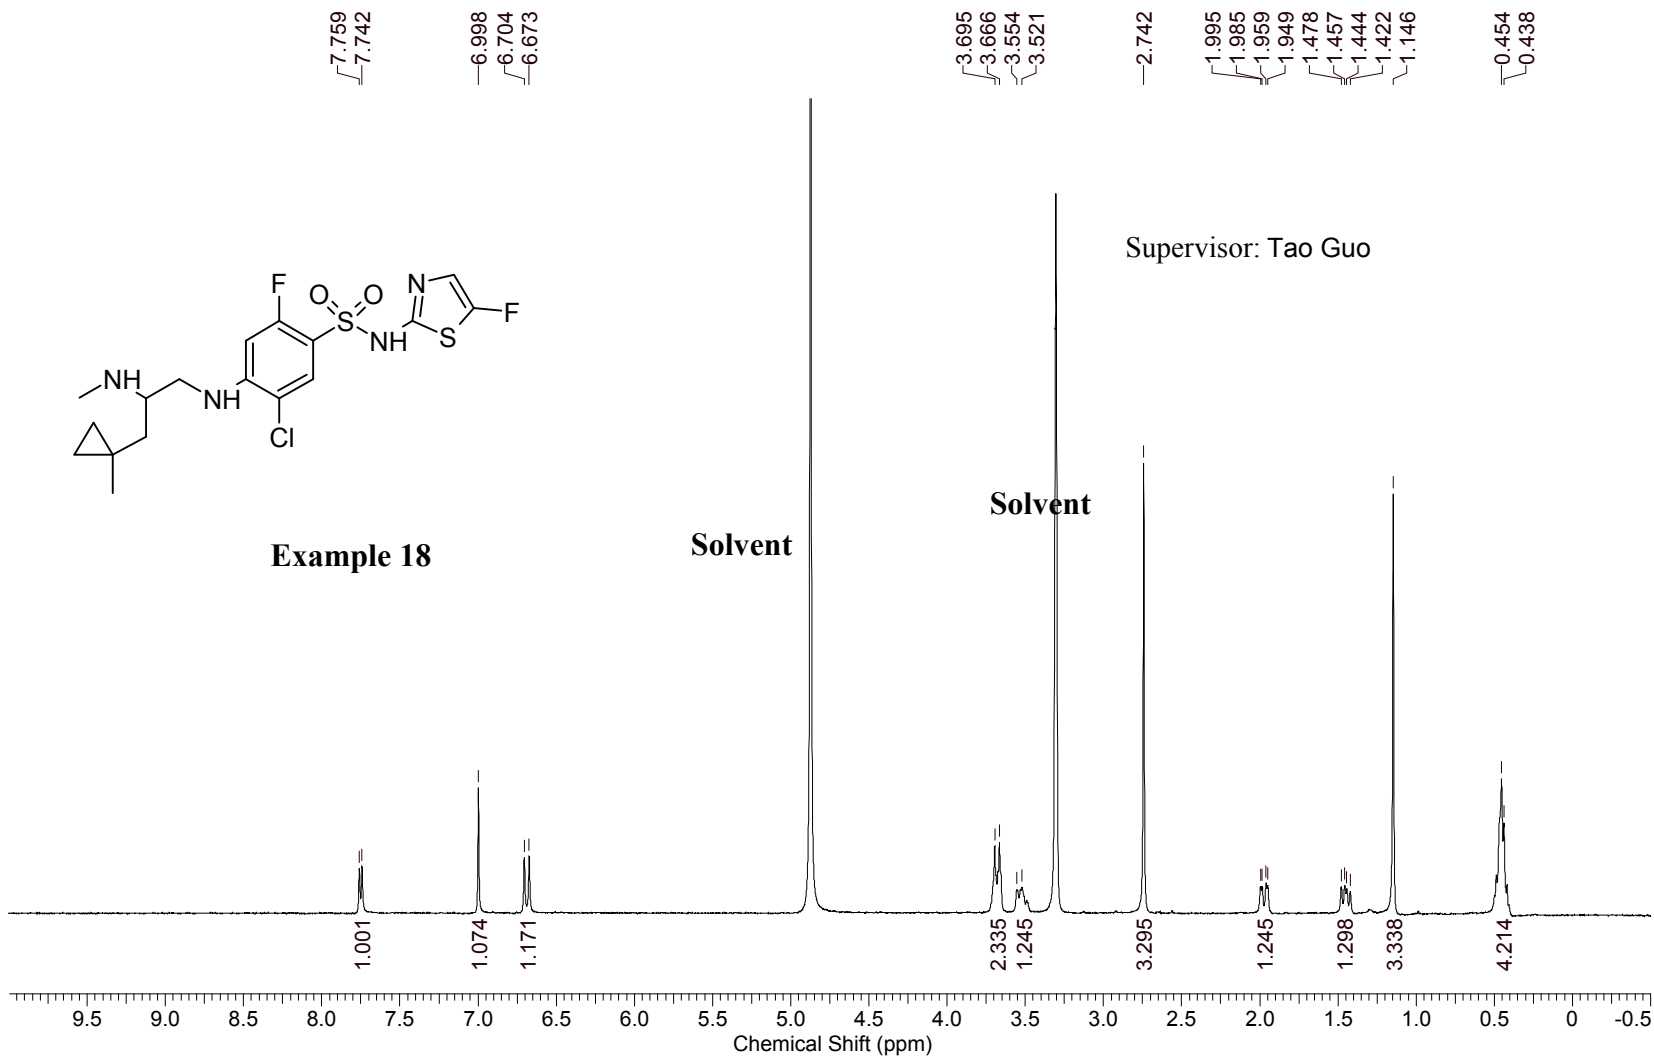

|                        |                                                  |
|------------------------|--------------------------------------------------|
| Acquisition Time (sec) | 2.2688                                           |
| Comment                | 1000223-1<br>12-1<br>MeOD<br>Varian_G_<br>400MHz |
| Date                   | Nov 6<br>2015                                    |
| Frequency (MHz)        | 399.74                                           |
| Nucleus                | 1H                                               |
| Number of Transients   | 8                                                |
| Original Points Count  | 16393                                            |
| Points Count           | 32768                                            |
| Pulse Sequence         | s2pul                                            |
| Receiver Gain          | 48.00                                            |
| Solvent                | METHAN<br>OL-d4                                  |
| Spectrum Offset (Hz)   | 2798.1553                                        |
| Spectrum Type          | STANDA<br>RD                                     |
| Sweep Width (Hz)       | 7225.43                                          |
| Temperature (degree C) | AMBIENT<br>TEMPER<br>ATURE                       |

Operator:

Date:

```

=====
Injection Date   : Mon, 9. Nov. 2015
Acq Operator    : AL260
Location        : P2-B-07
Inj. Vol.       : 0.1 ul
Acq Method      : C:\CHEM32\1\METHODS\WUXIAB10-220.M
Data Filename   : K:\151109A-G\A-GK92BG1.D
Instrument      : AK
    
```

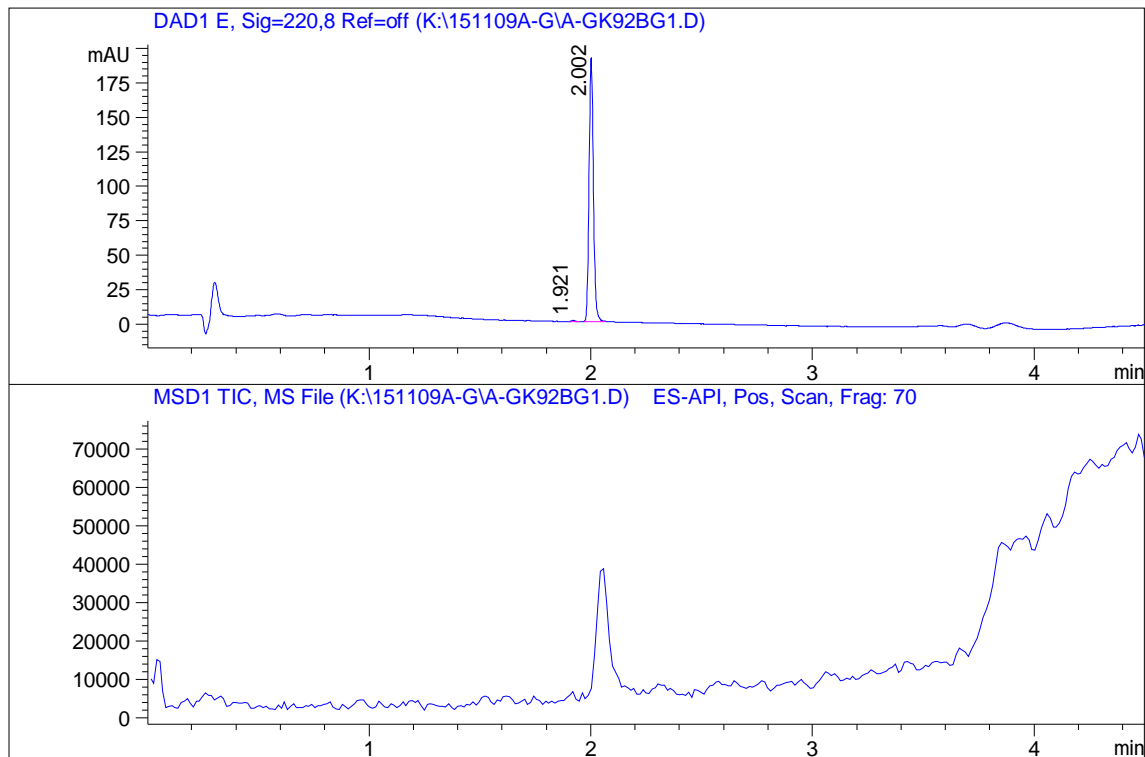

Report

```

=====
Signal 1 : DAD1 E, Sig=220,8 Ref=off
    
```

| Peak # | RT [min] | Height  | Height % | Width [min] | Area    | Area % |
|--------|----------|---------|----------|-------------|---------|--------|
| 1      | 1.921    | 0.827   | 0.429    | 0.017       | 0.909   | 0.347  |
| 2      | 2.002    | 191.905 | 99.571   | 0.021       | 260.836 | 99.653 |

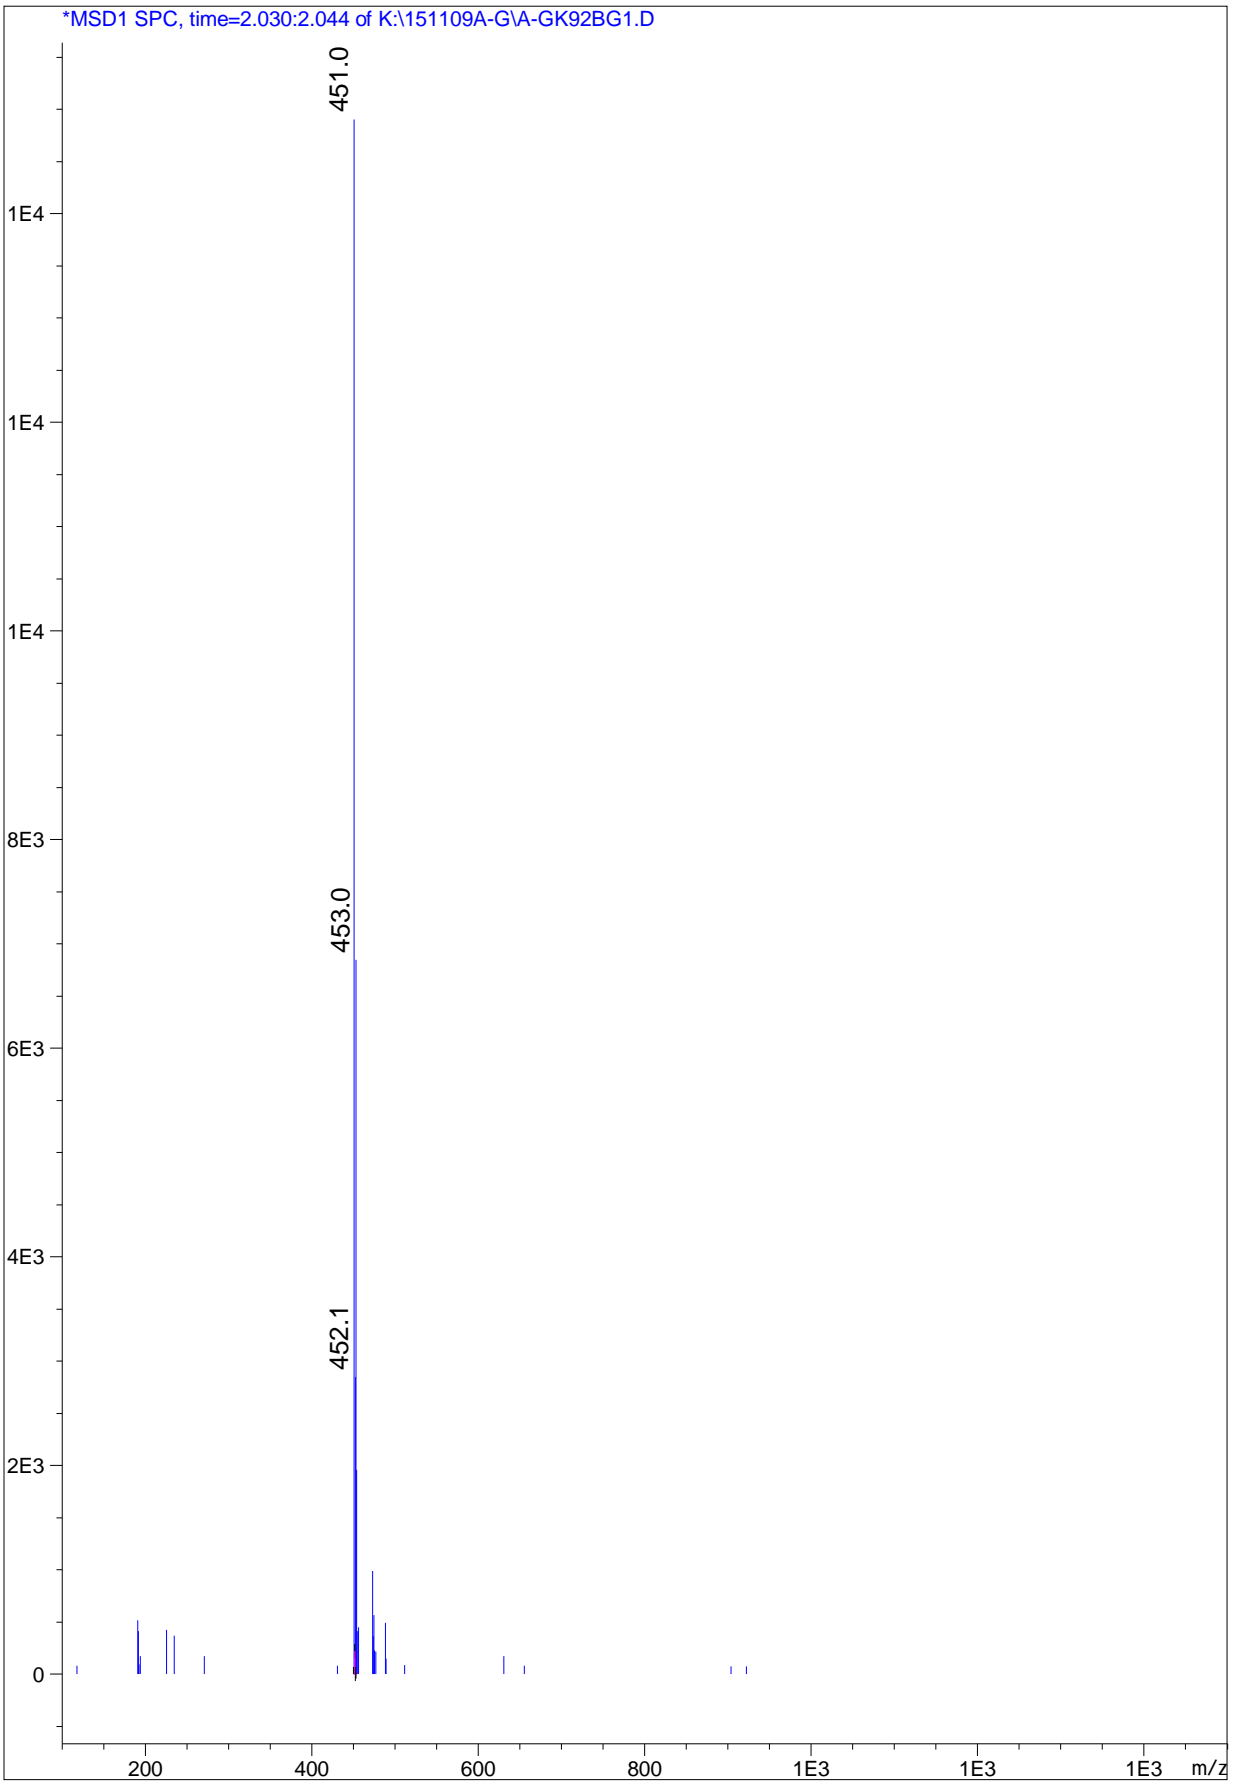

# SFC CHIRAL REPORT

## SAMPLE INFORMATION

|                     |                               |                   |             |
|---------------------|-------------------------------|-------------------|-------------|
| Sample Name:        | 1000223-112-A_E1              | Acquired By:      | System      |
| Compound ID:        | 1000223-112-A                 |                   |             |
| Acq. Method Set:    | AD_3_EtOH_DEA_40_25ML         | Vial:             | 1:C,4       |
| Channel Name:       | PDA Ch1 220nm@4.8nm -Compens. | Injection Volume: | 3.00 ul     |
| Proc. Chnl. Descr.: | PDA Ch1 220nm@4.8nm -Compens. | Run Time:         | 5.0 Minutes |
| Date Acquired:      | 11/9/2015 12:11:42 PM CST     |                   |             |
| Date Processed:     | 11/9/2015 12:23:50 PM CST     |                   |             |

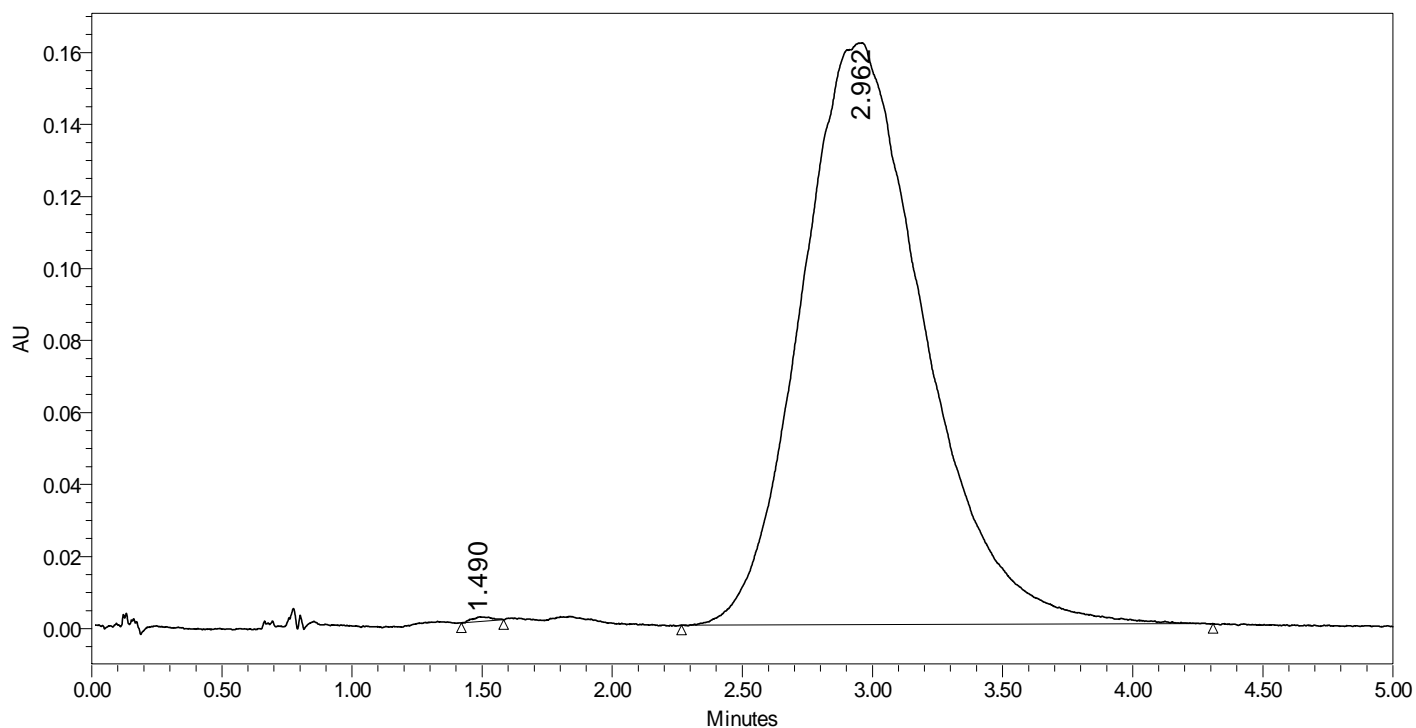

|   | RT    | Area    | % Area |
|---|-------|---------|--------|
| 1 | 1.490 | 6391    | 0.12   |
| 2 | 2.962 | 5296024 | 99.88  |

Operator: \_\_\_\_\_

Date: \_\_\_\_\_

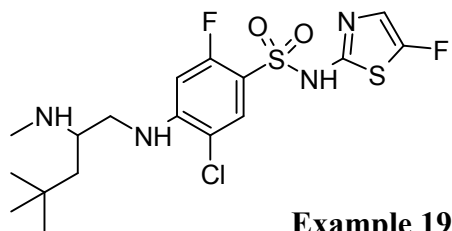

Solvent

Supervisor: Tao Guo

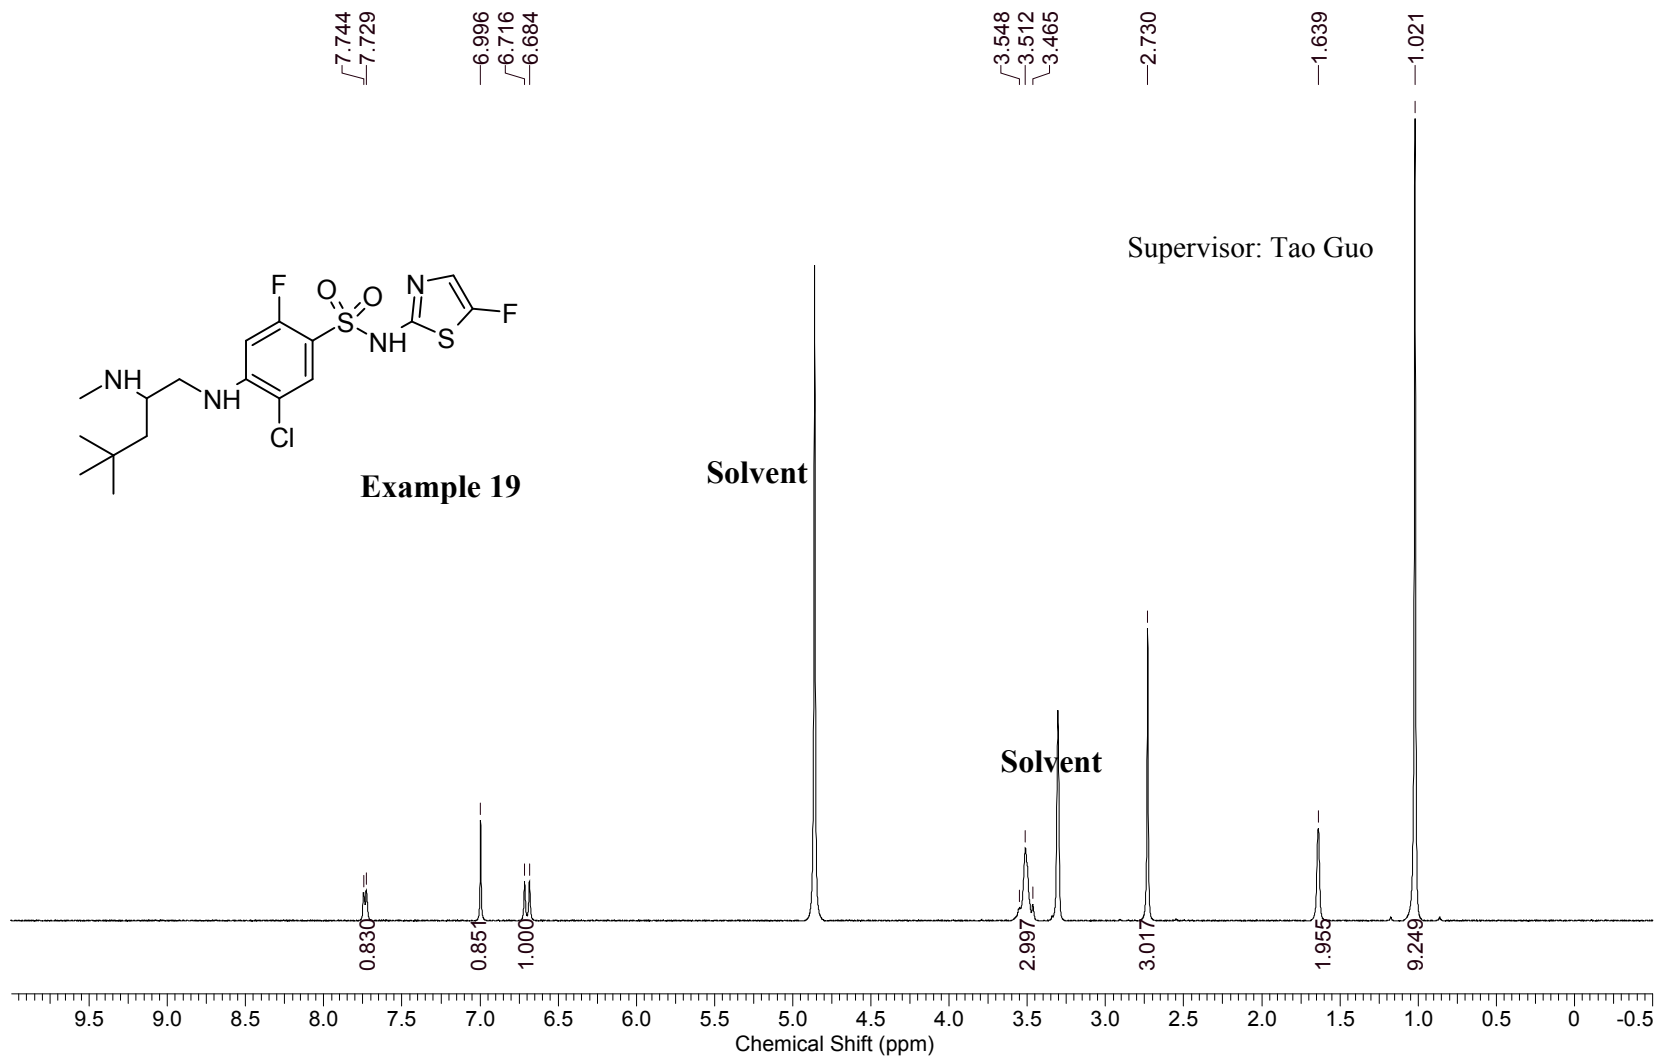

|                        |                                                  |
|------------------------|--------------------------------------------------|
| Acquisition Time (sec) | 2.2688                                           |
| Comment                | 1000709-0<br>21-a<br>MeOD<br>Varian_G_<br>400MHz |
| Date                   | Dec 2<br>2015                                    |
| Frequency (MHz)        | 399.74                                           |
| Nucleus                | 1H                                               |
| Number of Transients   | 8                                                |
| Original Points Count  | 16393                                            |
| Points Count           | 32768                                            |
| Pulse Sequence         | s2pul                                            |
| Receiver Gain          | 58.00                                            |
| Solvent                | METHAN<br>OL-d4                                  |
| Spectrum Offset (Hz)   | 2798.1553                                        |
| Spectrum Type          | STANDA<br>RD                                     |
| Sweep Width (Hz)       | 7225.43                                          |
| Temperature (degree C) | AMBIENT<br>TEMPER<br>ATURE                       |

```

=====
Injection Date   : Wed, 2. Dec. 2015
Acq Operator    : AL260
Location        : P1-A-06
Inj. Vol.       : 2.0 ul
Acq Method      : C:\CHEM32\1\METHODS\WUXIAB10-220.M
Data Filename   : K:\151202AK-G\AK-GL21AF1.D
Instrument      : AK
    
```

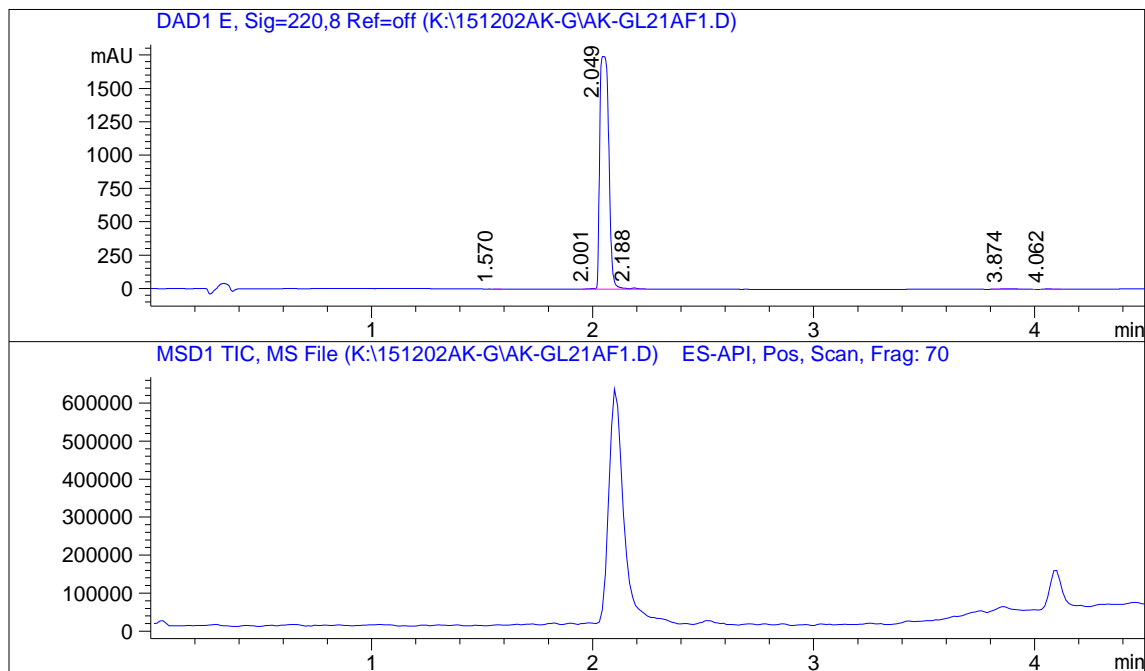

Report

```

=====
Signal 1 : DAD1 E, Sig=220,8 Ref=off
Peak      RT      Height  Height %  Width   Area   Area %
#         [min]                [min]
-----
1         1.570      0.606    0.034    0.014   0.532   0.011
2         2.001      5.869    0.332    0.024   9.765   0.196
3         2.049     1744.175  98.686    0.046  4921.833  98.807
4         2.188      7.980    0.452    0.028   15.559   0.312
5         3.874      4.496    0.254    0.072   24.747   0.497
6         4.062      4.278    0.242    0.032    8.813   0.177
-----
    
```

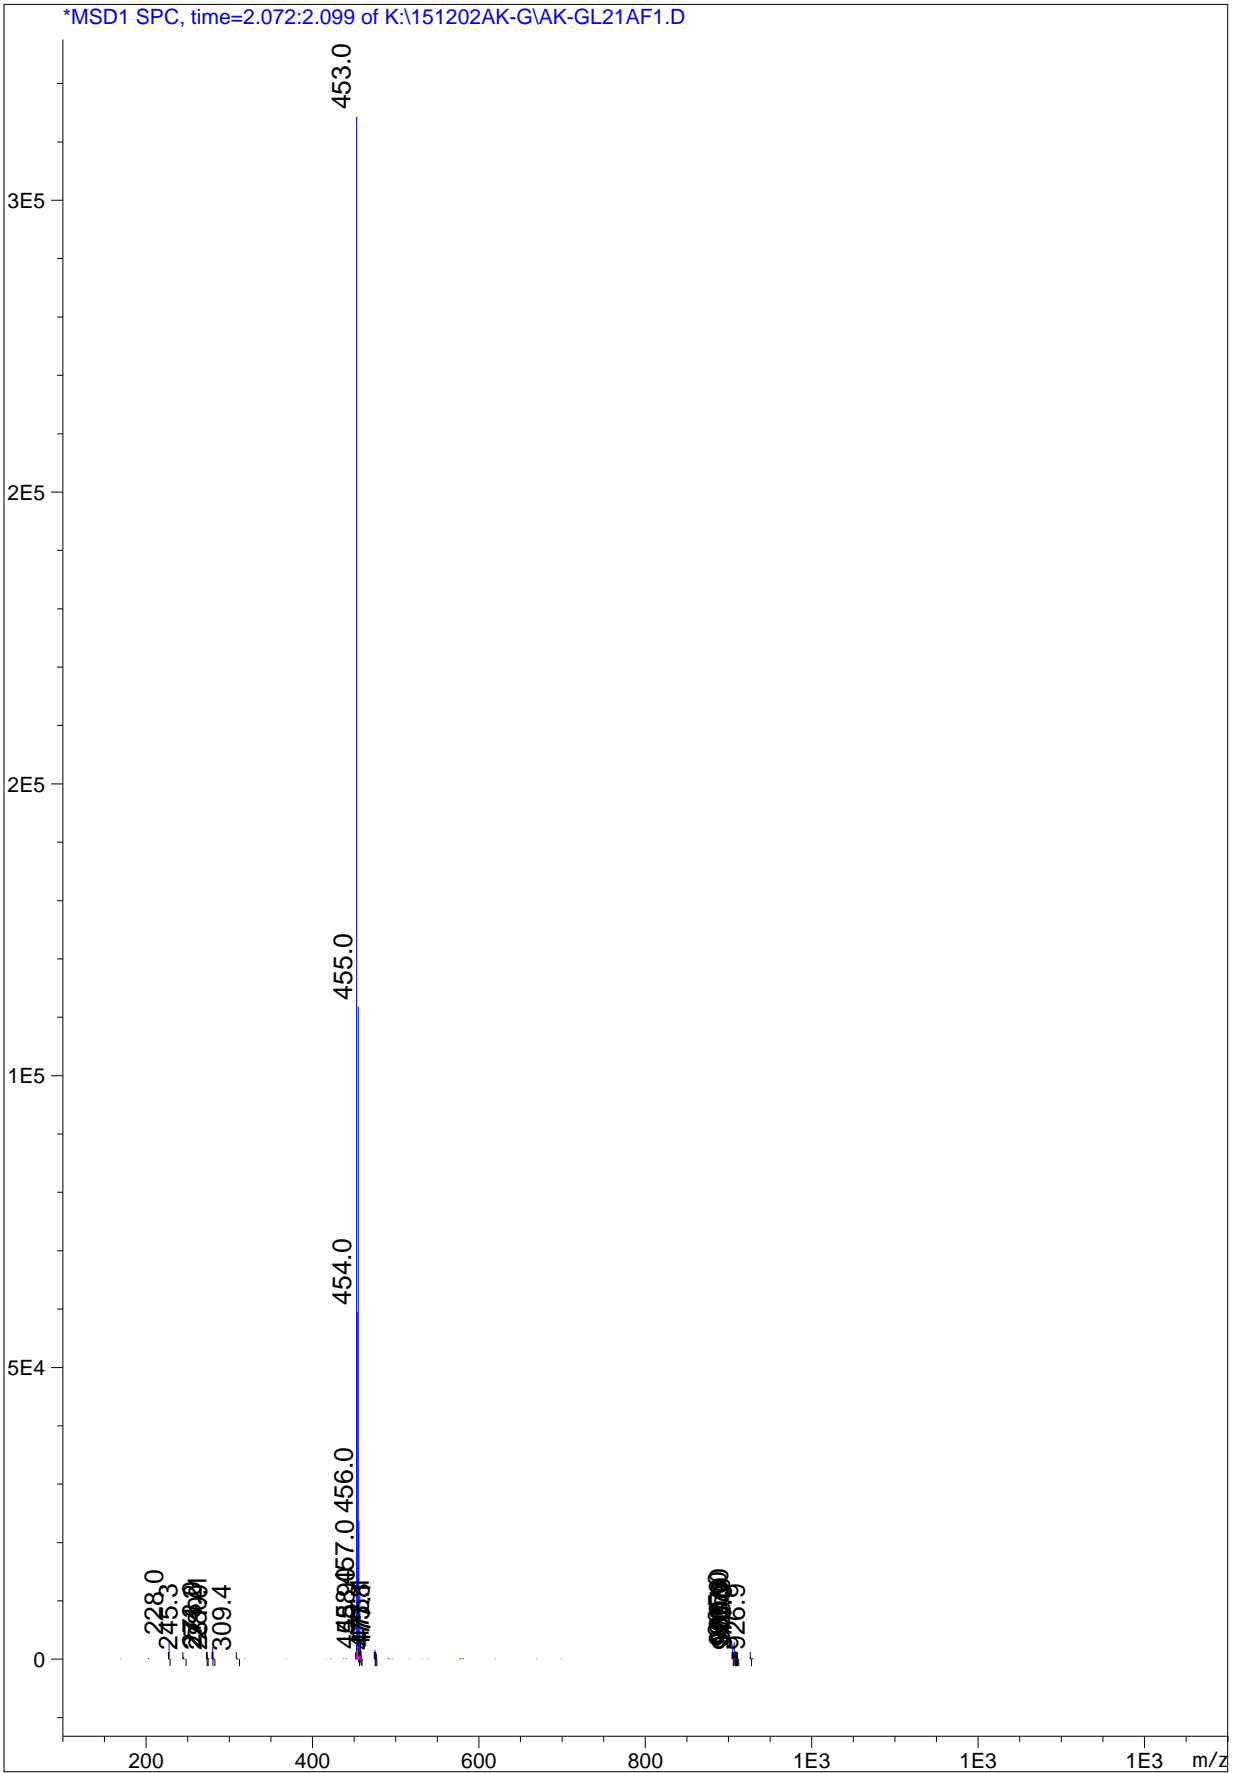



# SFC CHIRAL REPORT

## SAMPLE INFORMATION

|                     |                               |                   |              |
|---------------------|-------------------------------|-------------------|--------------|
| Sample Name:        | 1000709-021-b_E1              | Acquired By:      | System       |
| Compound ID:        | EBR0084                       |                   |              |
| Acq. Method Set:    | AD_3_EtOH_DEA_5_40_25ML       | Vial:             | 2:D,4        |
| Channel Name:       | PDA Ch1 220nm@4.8nm -Compens. | Injection Volume: | 8.00 ul      |
| Proc. Chnl. Descr.: | PDA Ch1 220nm@4.8nm -Compens. | Run Time:         | 10.0 Minutes |
| Date Acquired:      | 12/7/2015 6:12:49 PM CST      |                   |              |
| Date Processed:     | 12/8/2015 9:57:41 AM CST      |                   |              |

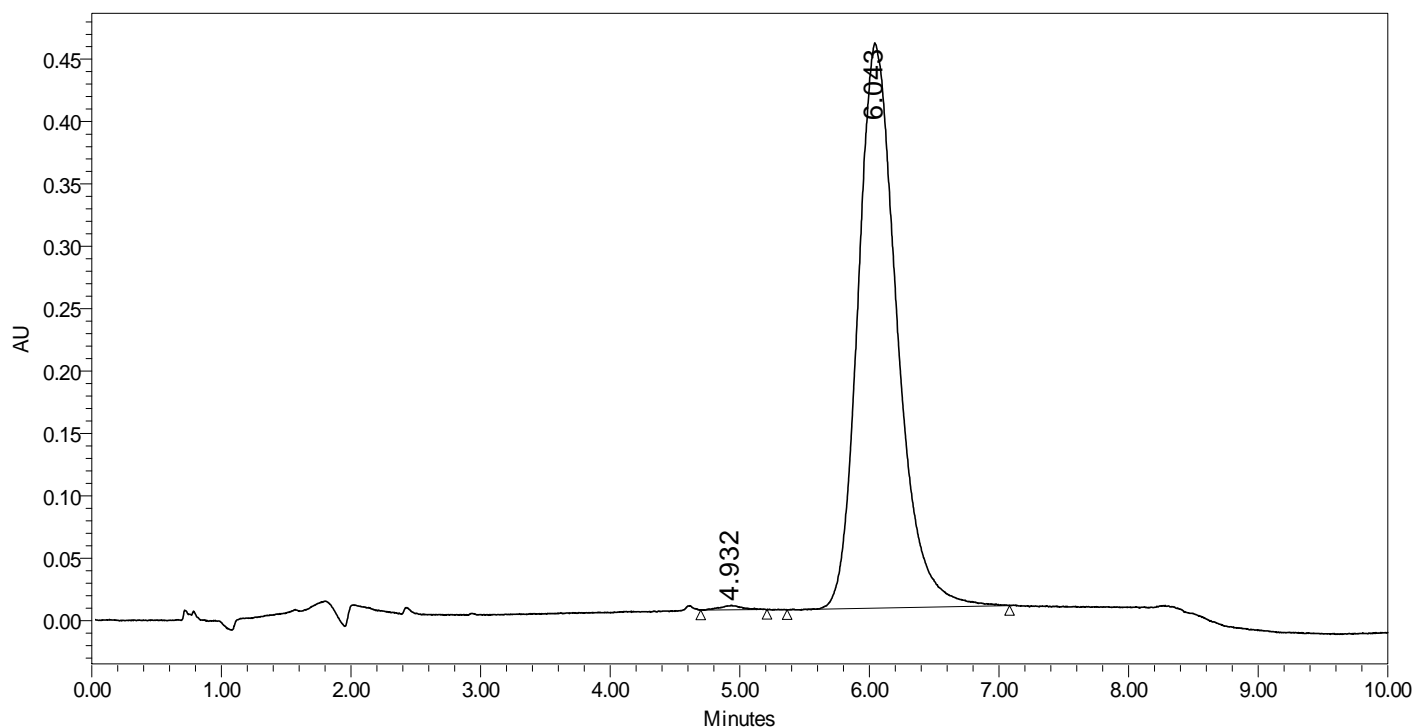

|   | RT    | Area    | % Area |
|---|-------|---------|--------|
| 1 | 4.932 | 40448   | 0.43   |
| 2 | 6.043 | 9462086 | 99.57  |

Operator: \_\_\_\_\_

Date: \_\_\_\_\_

161.77  
160.32  
158.32

151.46  
149.23  
146.82  
146.73

129.21  
129.19

117.79  
117.66  
113.43  
113.41

105.84  
105.66

99.13  
98.90

55.06

45.60  
41.67

29.81  
29.56  
28.32

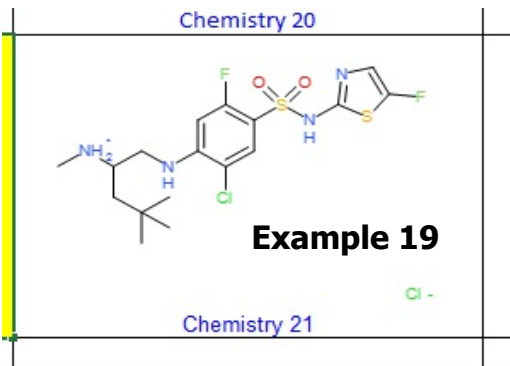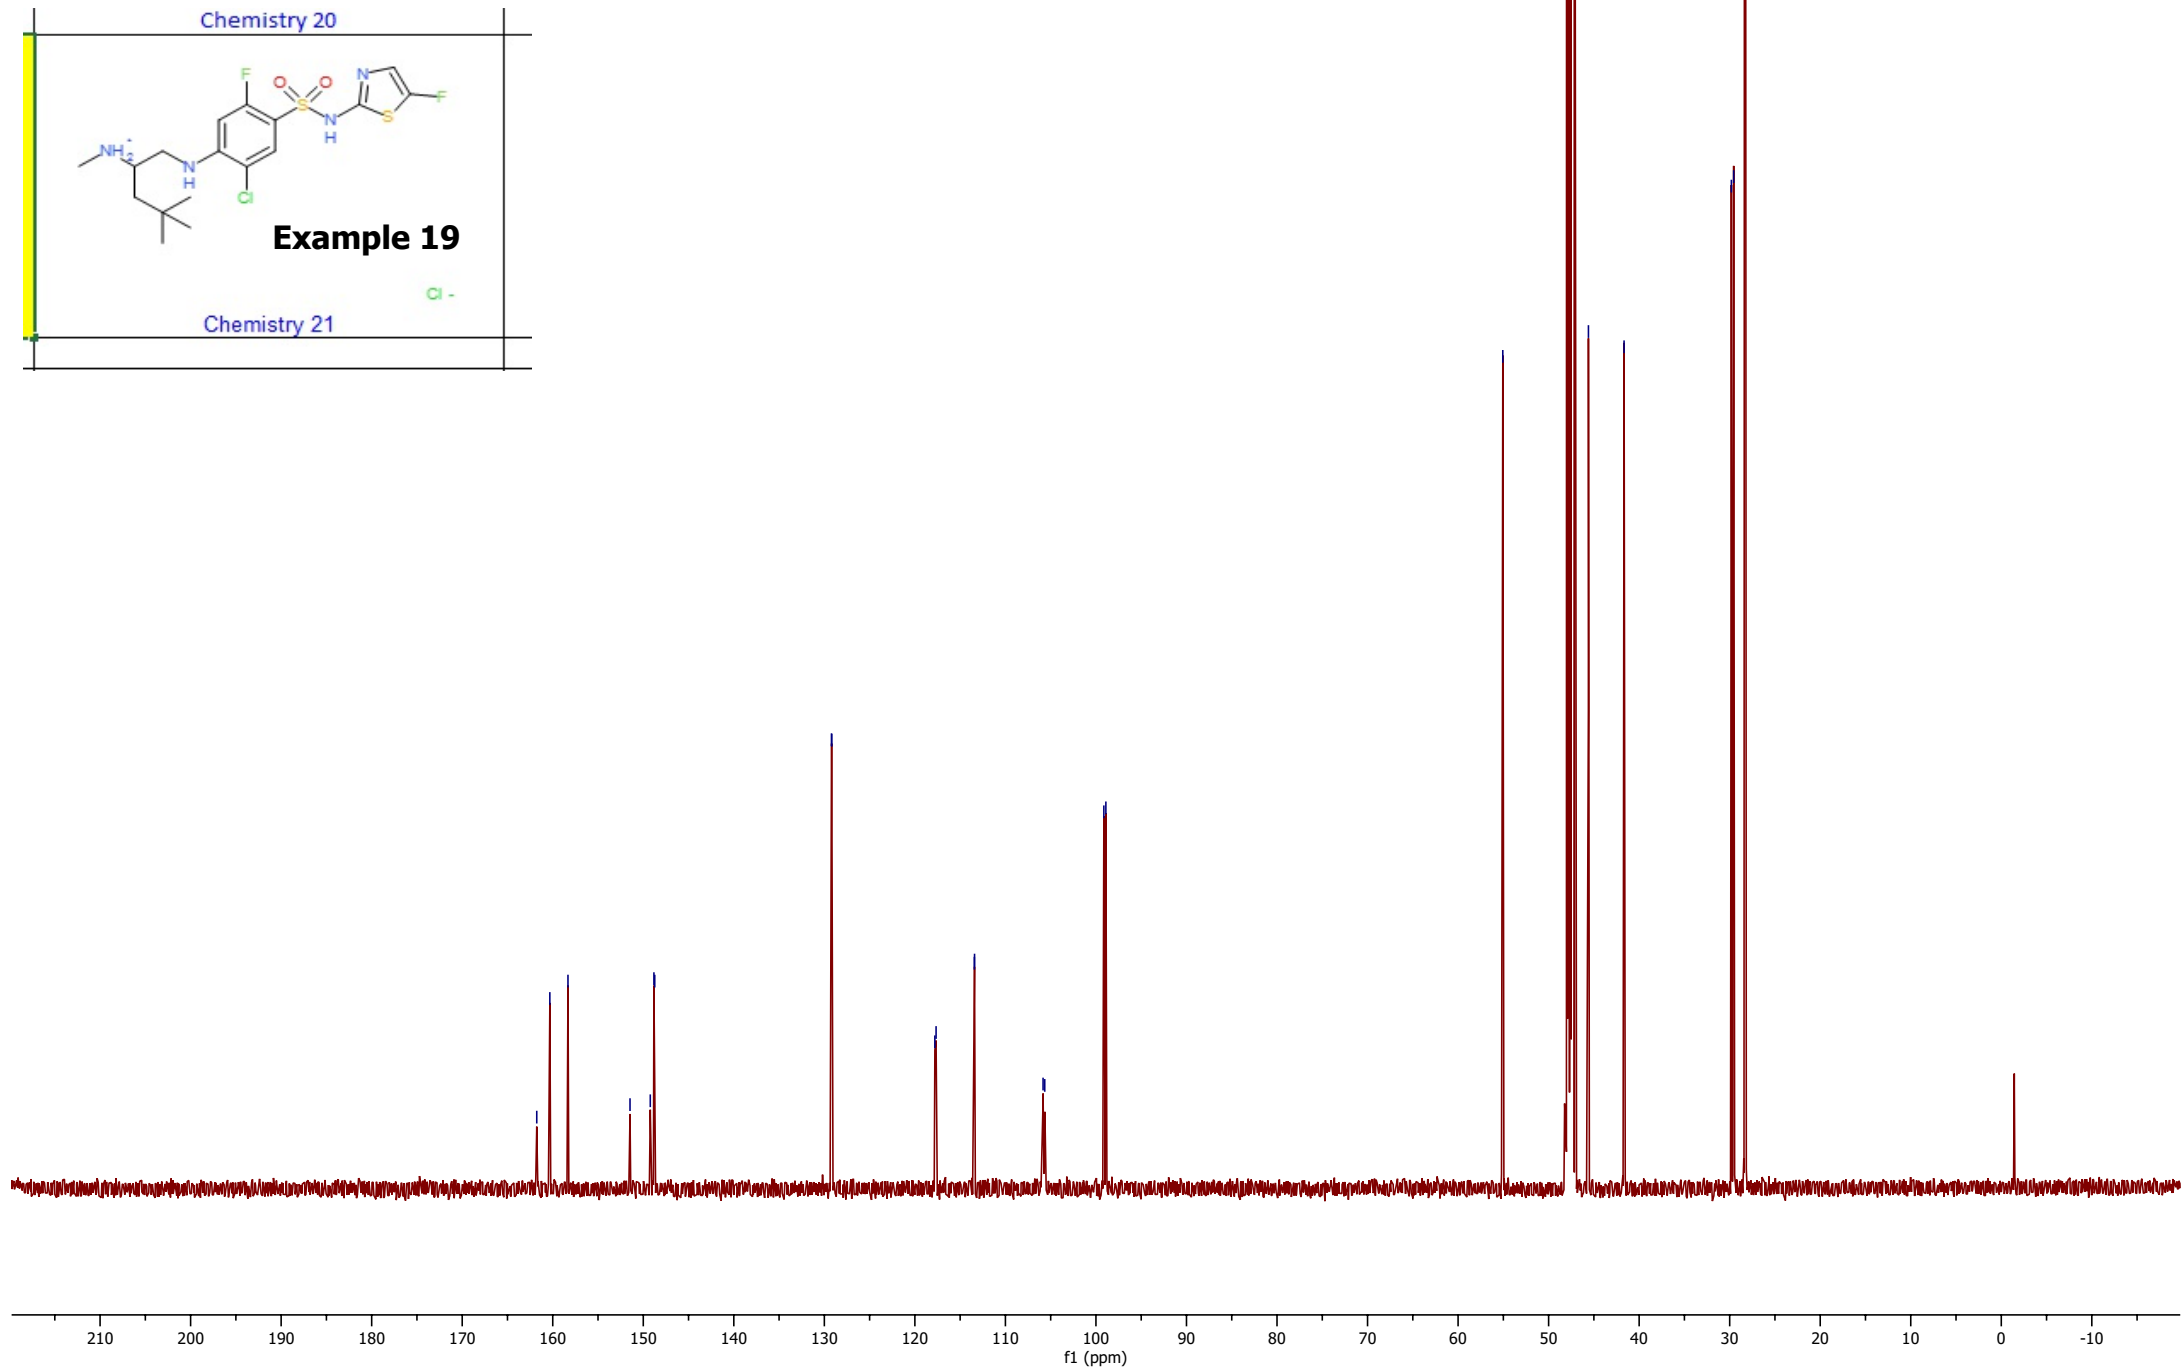

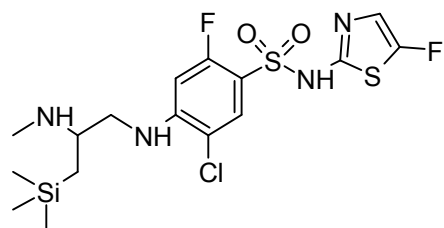

**Example 20**

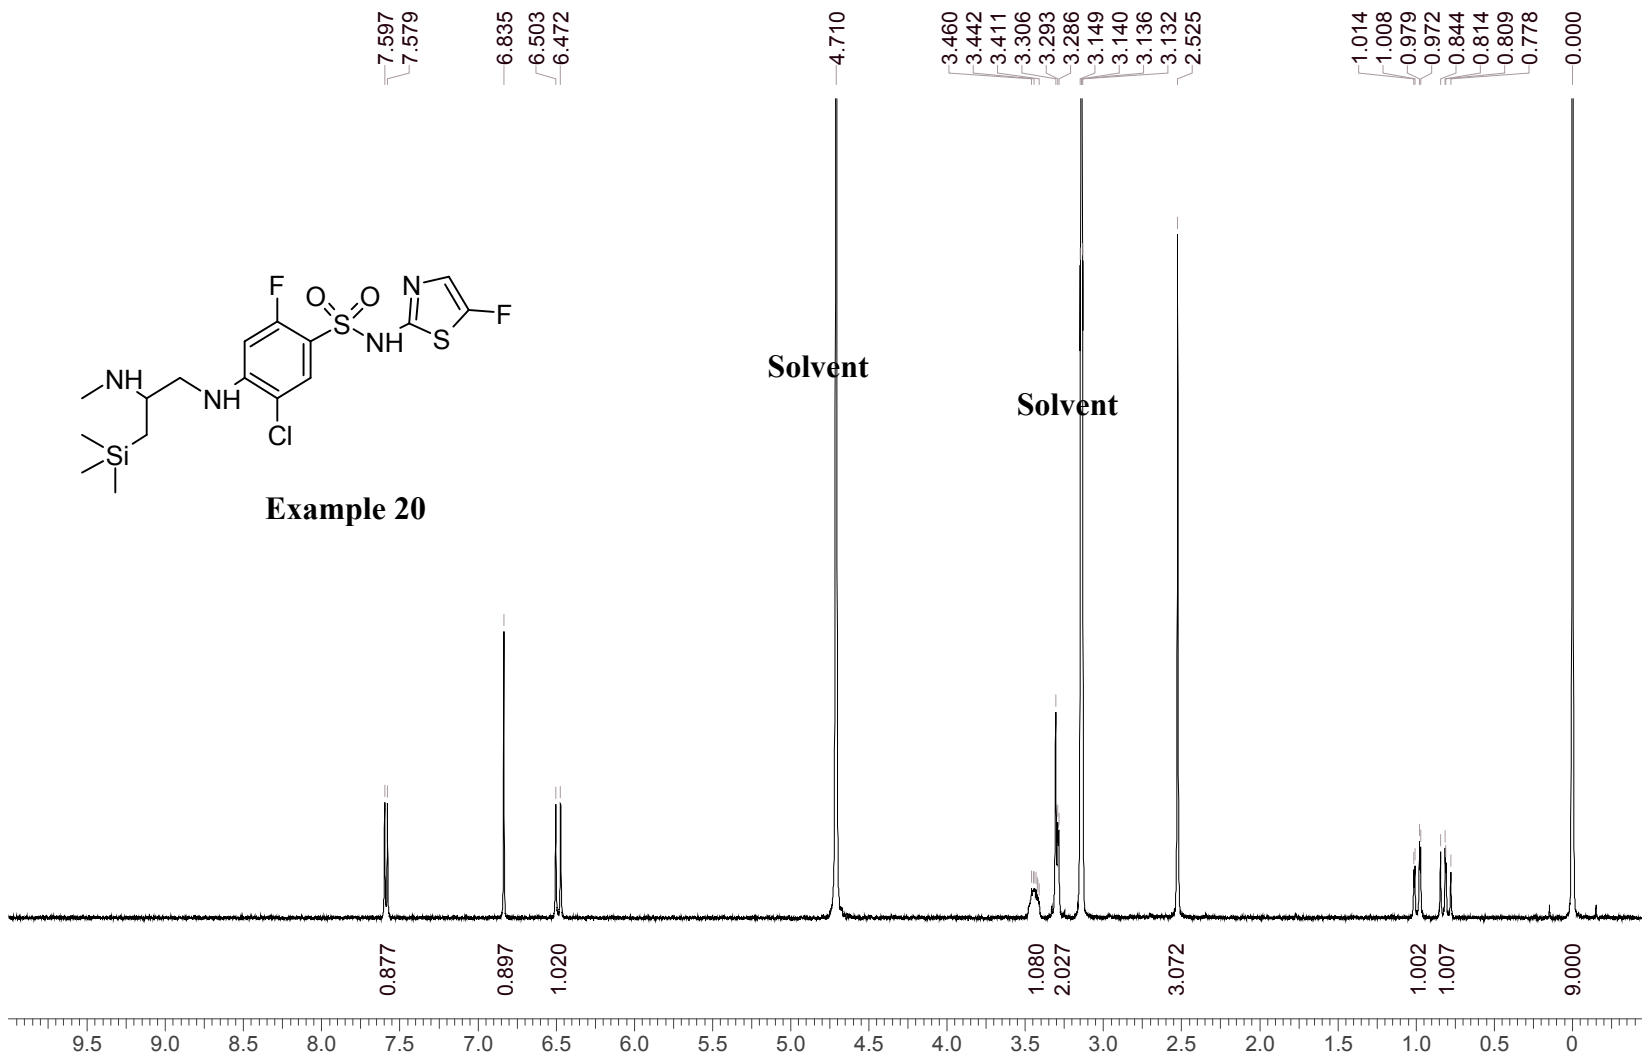

|                        |                                                  |
|------------------------|--------------------------------------------------|
| Acquisition Time (sec) | 2.2688                                           |
| Comment                | 1001203-0<br>93-2<br>MeOD<br>Varian_G_<br>400MHz |
| Date                   | May 20<br>2016                                   |
| Frequency (MHz)        | 399.7433                                         |
| Nucleus                | 1H                                               |
| Number of Transients   | 8                                                |
| Original Points Count  | 16393                                            |
| Points Count           | 32768                                            |
| Pulse Sequence         | s2pul                                            |
| Receiver Gain          | 46.00                                            |
| SW(cyclical) (Hz)      | 7225.43                                          |
| Solvent                | METHAN<br>OL-d4                                  |
| Spectrum Offset (Hz)   | 2733.0210                                        |
| Spectrum Type          | standard                                         |
| Sweep Width (Hz)       | 7225.21                                          |
| Temperature (degree C) | AMBIENT<br>TEMPER<br>ATURE                       |

```

=====
Injection Date   : Fri, 20. May. 2016
Acq Operator    : AL221
Location        : P1-B-07
Inj. Vol.       : 1.0ul
Acq Method      : C:\CHEM32\1\METHODS\WUXIAB01-220.M
Data Filename    : D:\DATA\160520AG\AGEK1BG1.D
Instrument       : Z
    
```

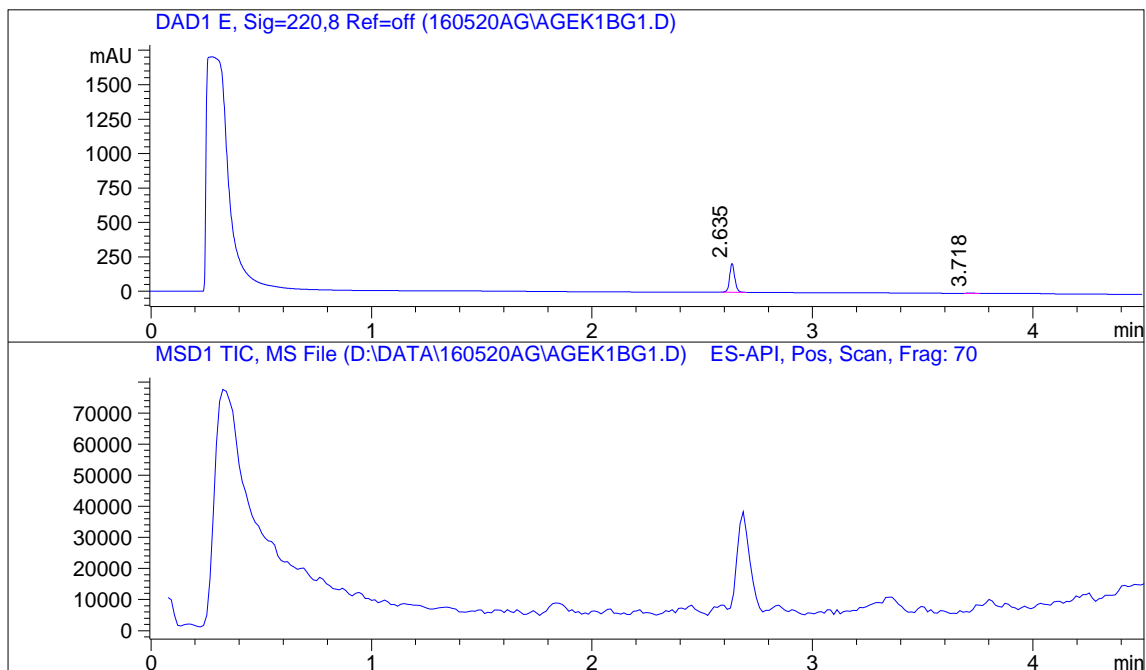

Report

```

=====
Signal 1 : DAD1 E, Sig=220,8 Ref=off
Peak  RT      Height  Height %  Width  Area   Area %
#    [min]                [min]
-----
  1    2.635   209.171   99.070    0.025  338.629  99.123
  2    3.718    1.964    0.930    0.023    2.996   0.877
-----
    
```

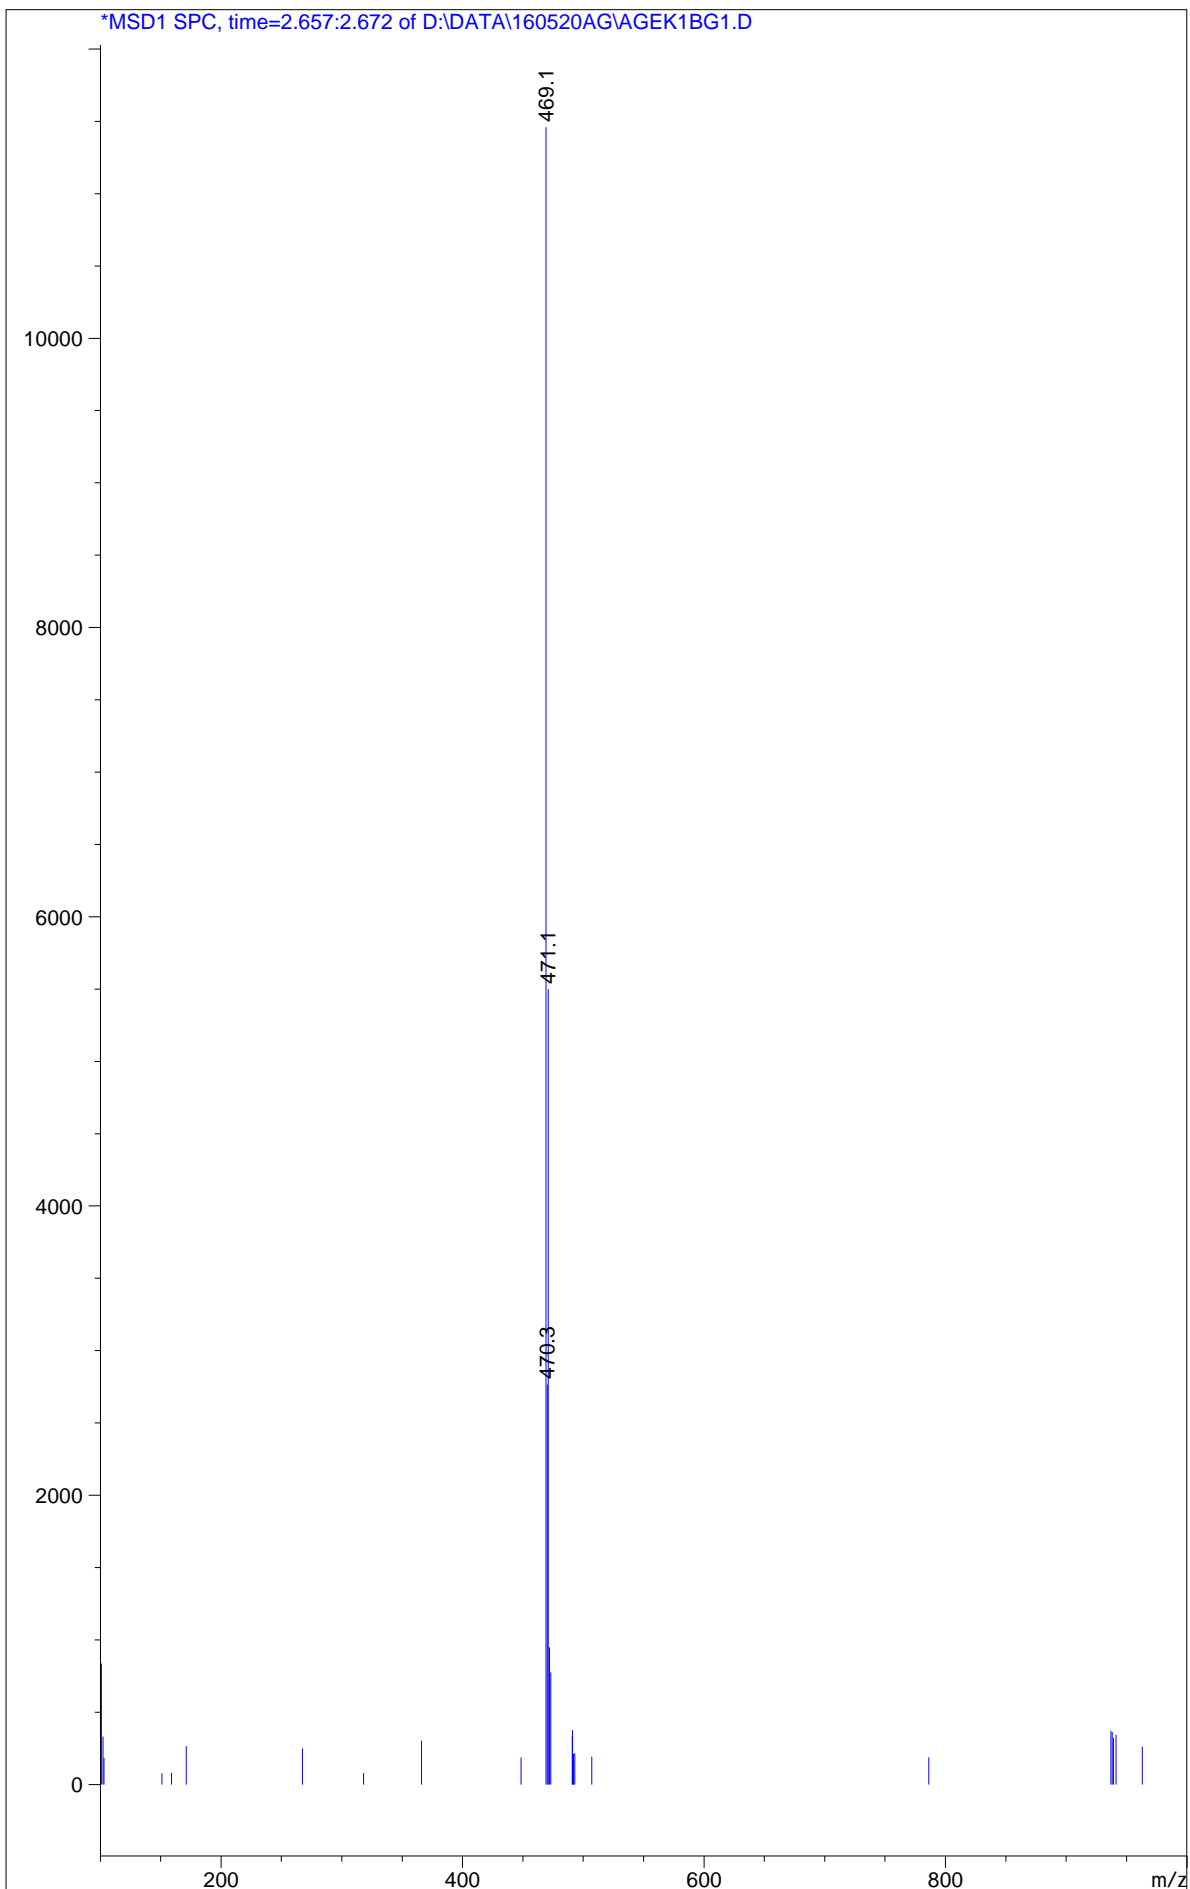

CHIRAL SFC REPORT

Compound ID : EBR0084 ->  
 Filename/Sample ID: 1001203-091-p1\_D1  
 Injection Date : 5/13/2016  
 Acq Method : D:\DATA\201605\20160512N 1\AD\_IPA(DEA)\_5\_40\_2,8ML\_8MI->  
 Data Filename : D:\DATA\201605\20160512N 1\1001203-091-P1\_D1.D  
 Instrument : SFC-D (12-102)  
 Method : Column: Chiralpak AD-3 100x4.6mm I.D., 3um  
 Mobile phase: A: CO2 B:iso-propanol (0.05% DEA)  
 Gradient: from 5% to 40% of B in 4.5min and hold 40%  
 for 2.5 min, then 5% of B for 1min  
 Flow rate: 2.8mL/min Column temperature:40 ->

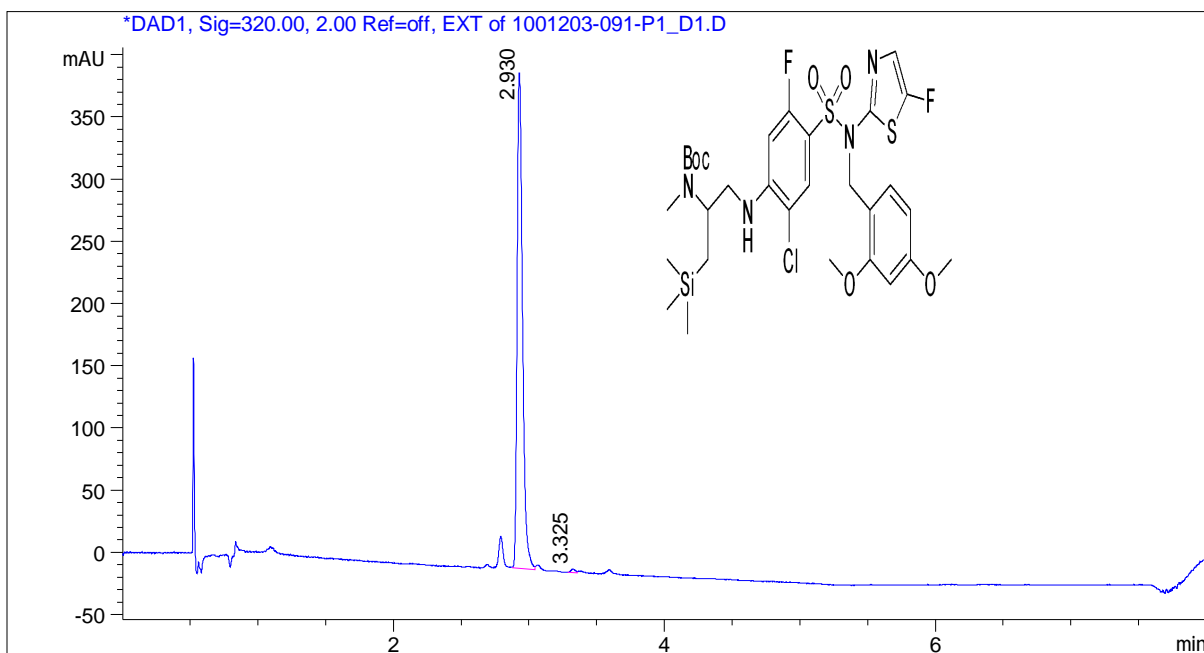

DAD1, Sig=320.00, 2.00 Ref=off, EXT

| # | Meas. | Ret. Time | Height  | Height % | Width | Area     | Area % |
|---|-------|-----------|---------|----------|-------|----------|--------|
| 1 |       | 2.930     | 398.631 | 99.249   | 0.046 | 1096.467 | 99.405 |
| 2 |       | 3.325     | 3.016   | 0.751    | 0.036 | 6.567    | 0.595  |

Operator: \_\_\_\_\_

Date: \_\_\_\_\_

# LCMS REPORT

Compound ID :1  
 Sample ID : 0366156-0128-L1  
 Injection Date :12/4/2014 11:35:18  
 Injection Vol : 20ul  
 Location :tray1 vail20  
 Acq Method :10-80AB 2min 220&254.lcm  
 Org DateFile :0366156-0128-L1.lcd  
 Instrument & column:LCMS-AP 3-101  
 Xtimate C18, 3um,2.1\*3mm

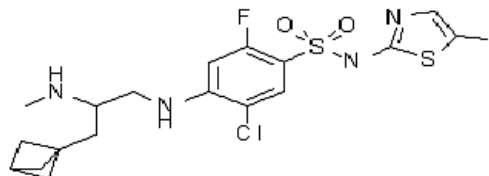

Exact Mass: 462.08

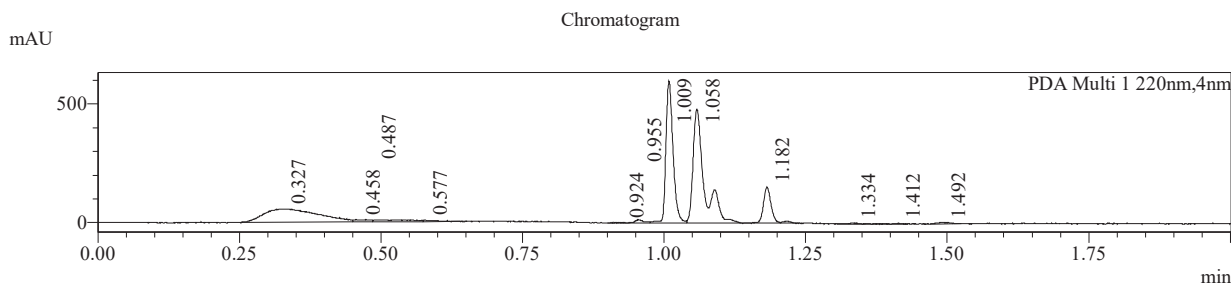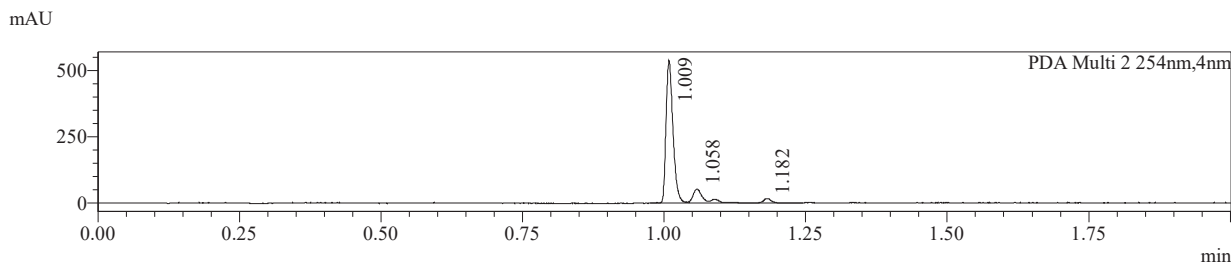

- 1 PDA Multi 1 / 220nm,4nm
- 2 PDA Multi 2 / 254nm,4nm

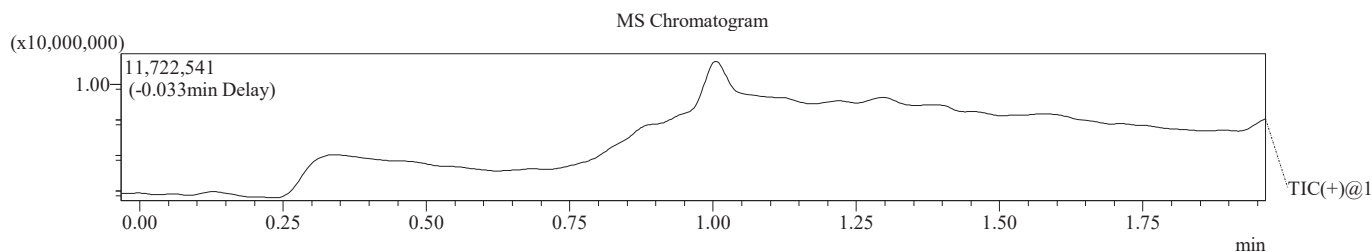

## Integration Result

| Peak Table    |           |        |         |           |        |        |  |
|---------------|-----------|--------|---------|-----------|--------|--------|--|
| PDA Ch1 220nm |           |        |         |           |        |        |  |
| Peak#         | Ret. Time | Height | Height% | USP Width | Area   | Area%  |  |
| 1             | 0.327     | 55421  | 4.315   | 0.157     | 373545 | 20.493 |  |
| 2             | 0.458     | 8806   | 0.686   | 0.149     | 17351  | 0.952  |  |
| 3             | 0.487     | 7437   | 0.579   | 0.000     | 35297  | 1.936  |  |
| 4             | 0.577     | 5805   | 0.452   | 0.044     | 9938   | 0.545  |  |
| 5             | 0.924     | 2141   | 0.167   | 0.027     | 3771   | 0.207  |  |
| 6             | 0.955     | 12588  | 0.980   | 0.026     | 15435  | 0.847  |  |
| 7             | 1.009     | 566629 | 44.119  | 0.023     | 528850 | 29.013 |  |
| 8             | 1.058     | 468297 | 36.463  | 0.028     | 670000 | 36.757 |  |
| 9             | 1.182     | 145567 | 11.334  | 0.025     | 150566 | 8.260  |  |
| 10            | 1.334     | 3519   | 0.274   | 0.021     | 5188   | 0.285  |  |
| 11            | 1.412     | 1653   | 0.129   | 0.013     | 2787   | 0.153  |  |
| 12            | 1.492     | 6452   | 0.502   | 0.037     | 10061  | 0.552  |  |

Peak Table

PDA Ch2 254nm

| Peak# | Ret. Time | Height | Height% | USP Width | Area   | Area%  |
|-------|-----------|--------|---------|-----------|--------|--------|
| 1     | 1.009     | 506763 | 88.108  | 0.023     | 461468 | 82.807 |
| 2     | 1.058     | 51639  | 8.978   | 0.029     | 76987  | 13.815 |
| 3     | 1.182     | 16758  | 2.914   | 0.025     | 18829  | 3.379  |

Operator: \_\_\_\_\_

Date: \_\_\_\_\_



Mass Spectrum

RetTime:0.327 Datafile: D:\data\1412\141204\0366156-0128-L1.lcd

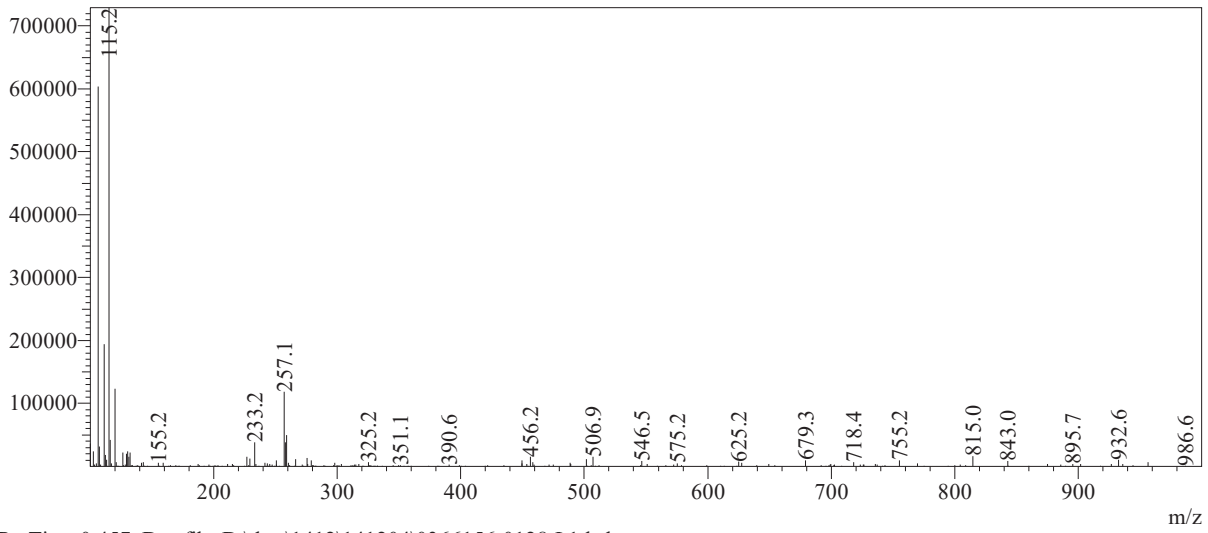

RetTime:0.457 Datafile: D:\data\1412\141204\0366156-0128-L1.lcd

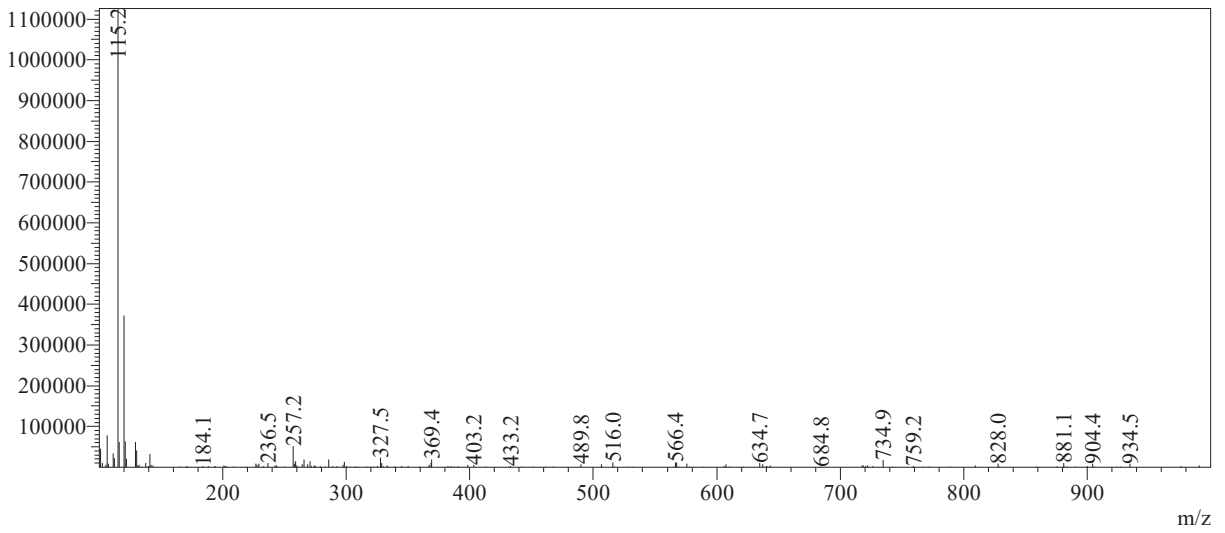

RetTime:0.487 Datafile: D:\data\1412\141204\0366156-0128-L1.lcd

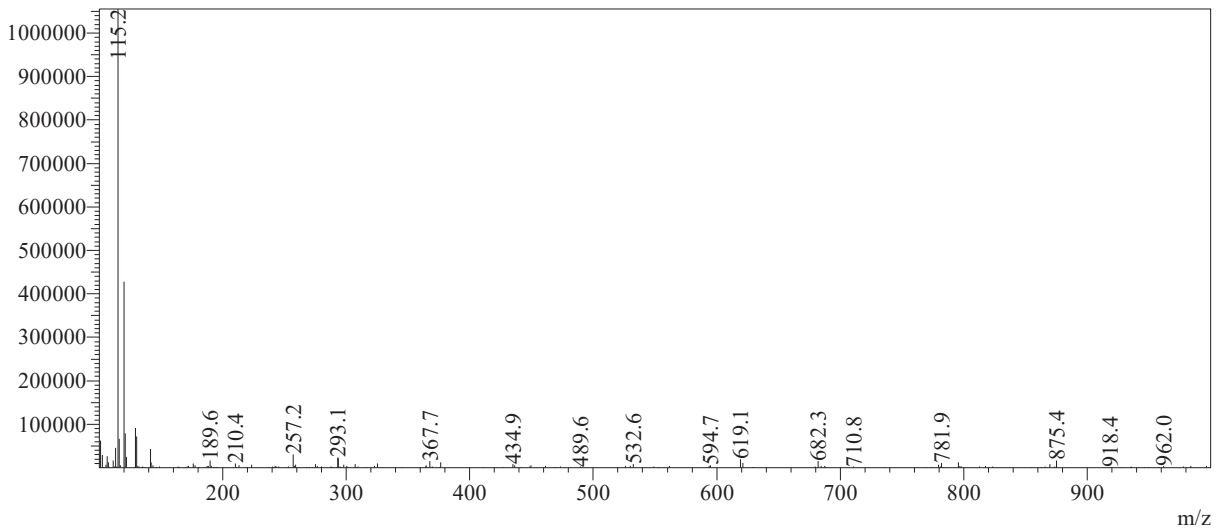

RetTime:1.010 Datafile: D:\data\1412\141204\0366156-0128-L1.lcd

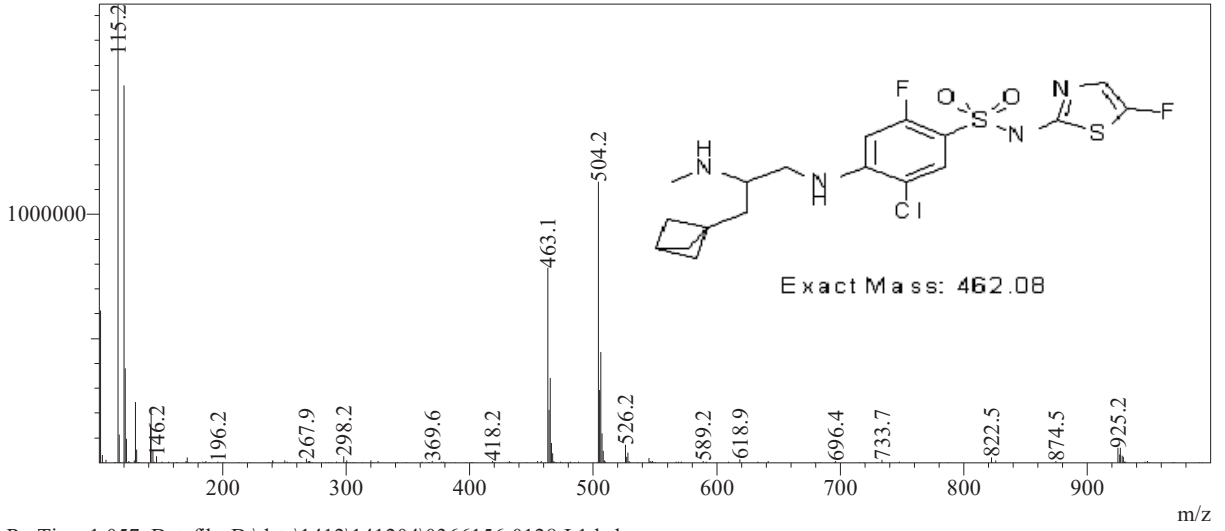

RetTime:1.057 Datafile: D:\data\1412\141204\0366156-0128-L1.lcd

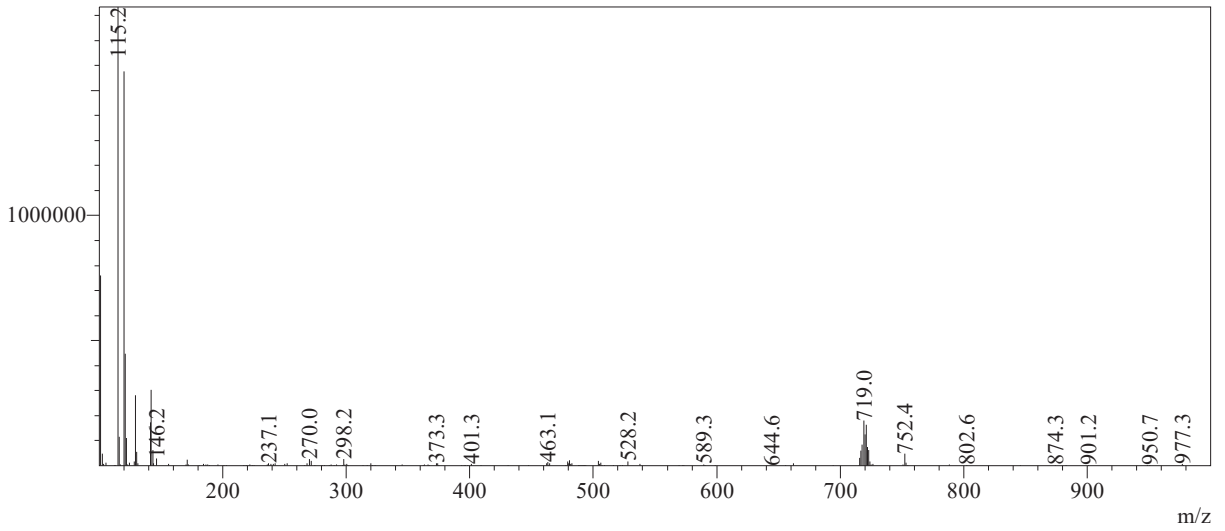

RetTime:1.183 Datafile: D:\data\1412\141204\0366156-0128-L1.lcd

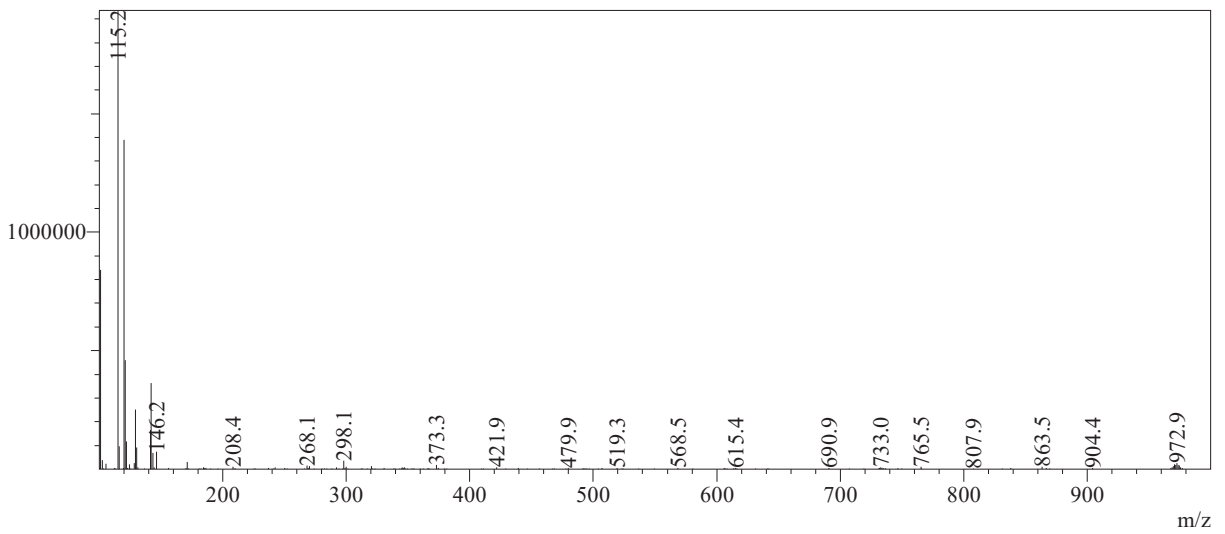

Compound ID: EBR0084\_C1873\_A\_001

360432 0366156-0128-1A MeOD varian 400

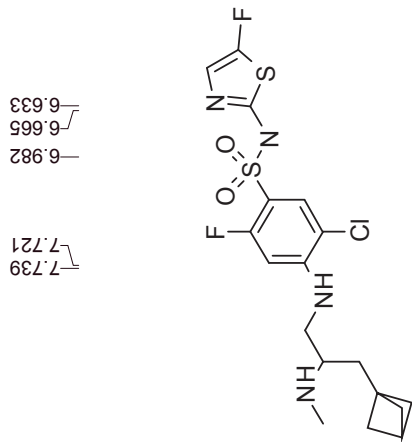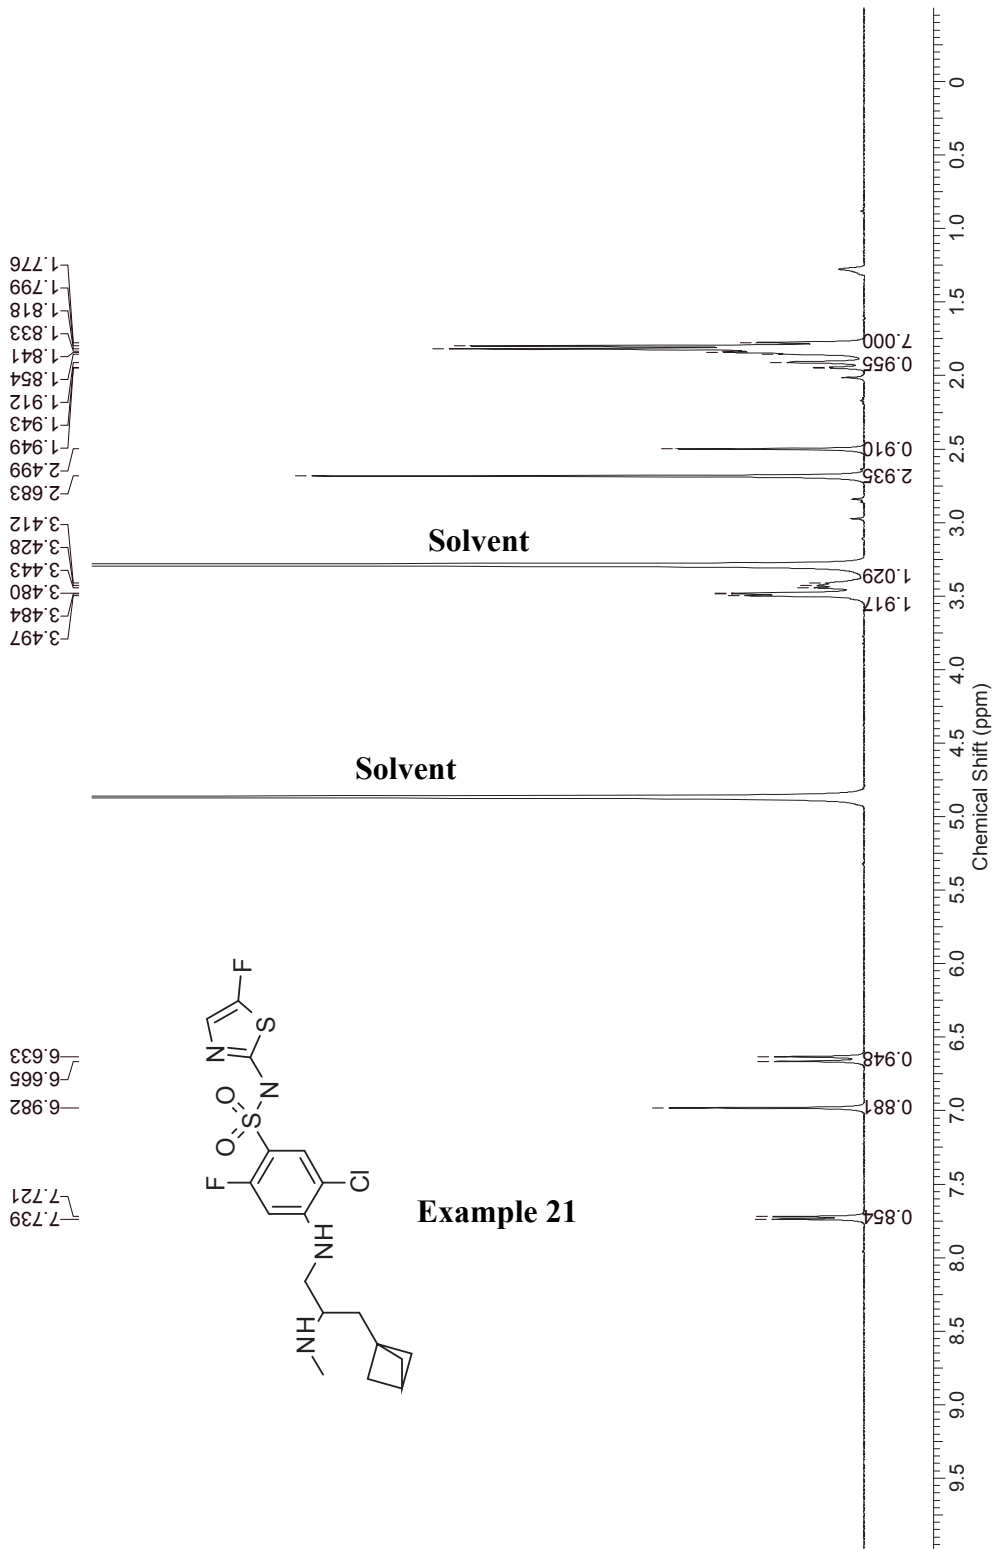

Acquisition Time (sec) 3.0000  
Comment 360432  
0366156-0  
128-1A  
MeOD  
varian 400  
Date Dec 5  
2014  
Frequency (MHz) 399.88  
Nucleus <sup>1</sup>H  
Number of Transients 8  
Original Points Count 19231  
Points Count 32768  
Pulse Sequence s2pul  
Receiver Gain 60.00  
Solvent METHAN  
OL-d4  
Spectrum Offset (Hz) 2399.2805  
Spectrum Type STANDA  
RD  
Sweep Width (Hz) 6410.26  
Temperature (degree C) AMBIENT  
TEMPER  
ATURE

Operator:

Date:

```

=====
Injection Date   : Mon, 8. Dec. 2014
Acq Operator    : AL260
Location        : P1-C-08
Inj. Vol.       : 1.0 ul
Acq Method      : C:\CHEM32\1\METHODS\WUXIAB10.M
Data Filename   : K:\141208AG\AGL81CH1.D
LC-MS
    
```

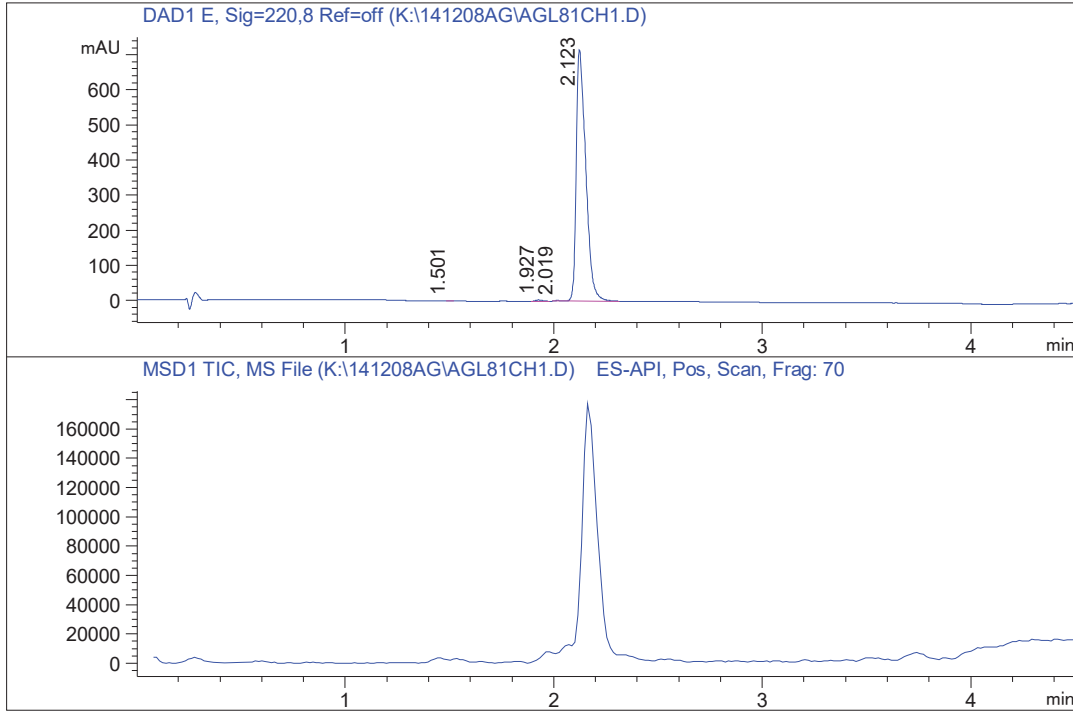

Report

```

=====
Signal 1 : DAD1 E, Sig=220,8 Ref=off
Peak #    RT      Area    Height  Height %  Width  Area %
      [min]
-----
1      1.501    0.947    0.718    0.099    0.022    0.042
2      1.927    9.459    4.056    0.561    0.035    0.415
3      2.019    4.651    1.833    0.253    0.042    0.204
4      2.123  2264.945  716.896  99.087    0.053   99.340
-----
    
```

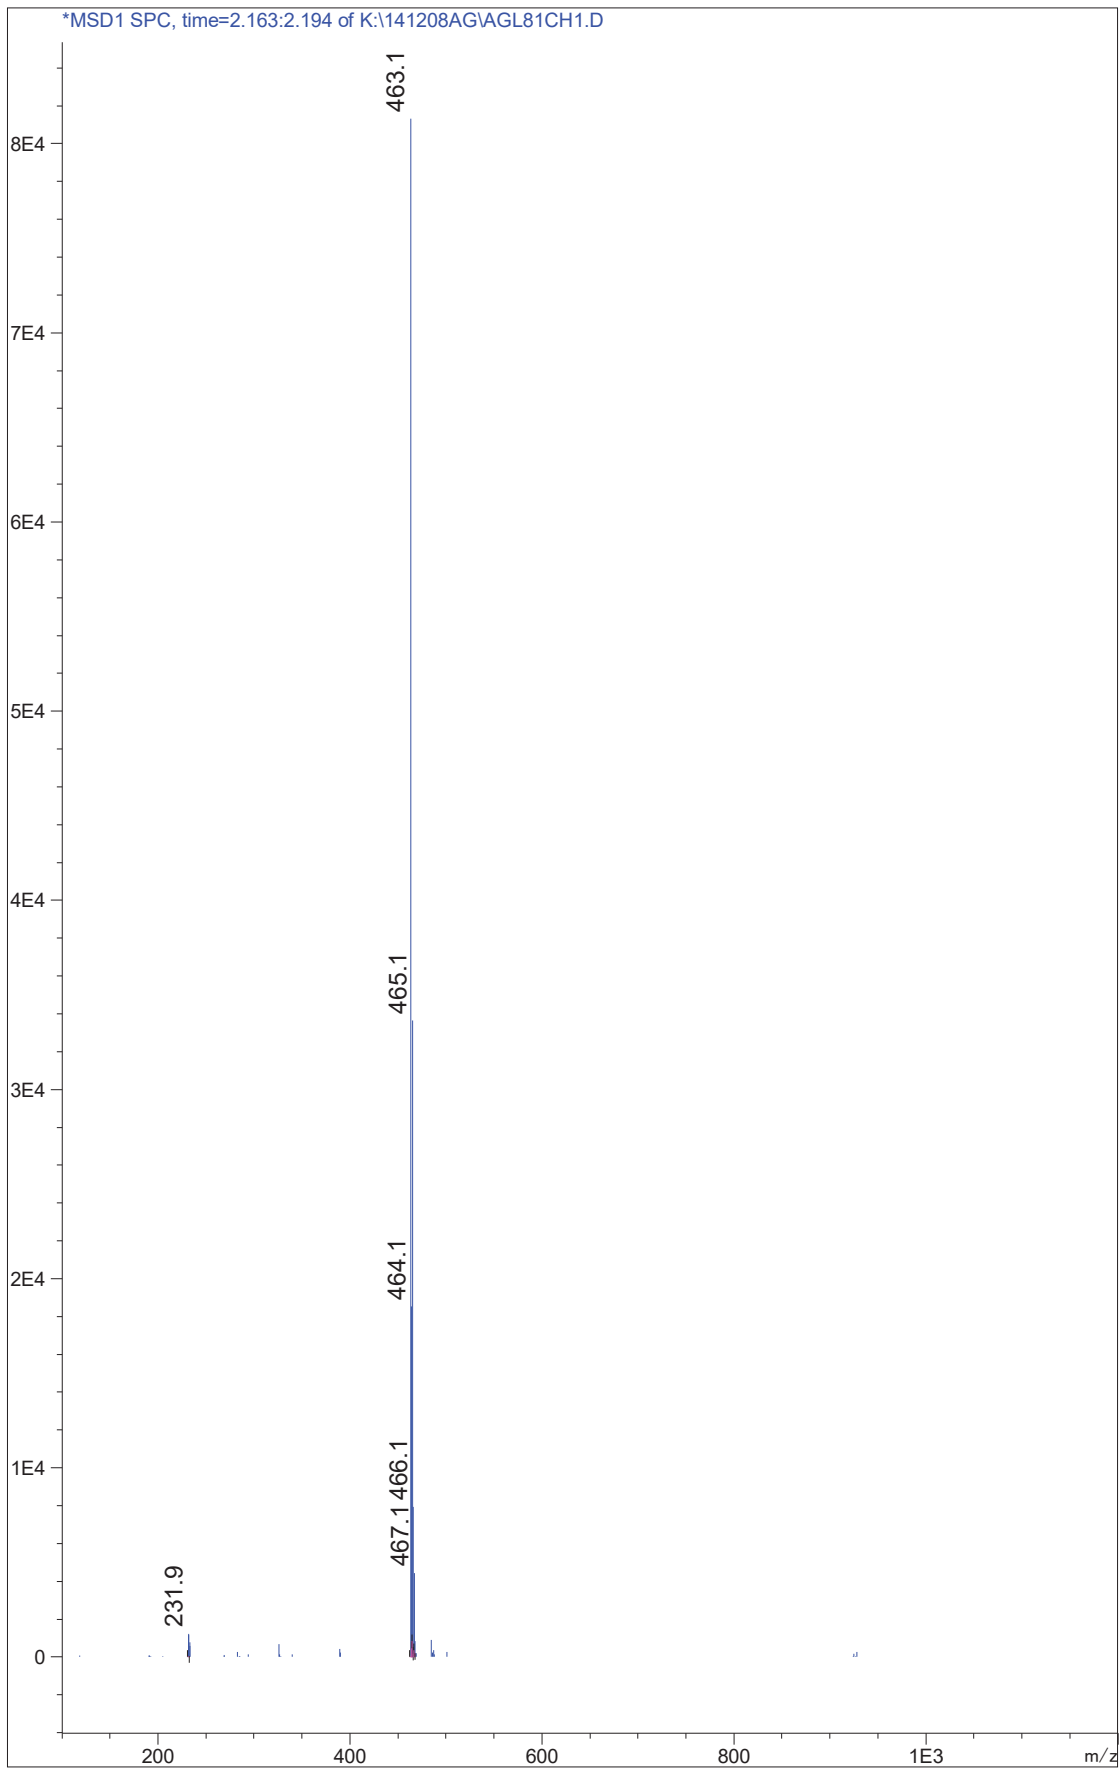

Confidential. For research only NOT for regulatory filing

CHIRAL SFC REPORT

Compound ID : 0366156-0128-ee ->  
 Filename/Sample ID: 0366156-0128-ee\_D1  
 Injection Date : 12/8/2014  
 Acq Method : D:\DATA\201412\20141208\AD\_ETOH(DEA)\_5\_40\_2,8ML\_8MIN.M  
 Data Filename : D:\DATA\201412\20141208\0366156-0128-EE\_D1.D  
 Instrument : SFC-D (12-102)  
 Method : Column: Chiralpak AD-3 100×4.6mm I.D., 3um  
 Mobile phase: A: CO2 B:ethanol (0.05% DEA)  
 Gradient: from 5% to 40% of B in 4.5min and hold 40%  
 for 2.5 min, then 5% of B for 1 min  
 Flow rate: 2.8mL/min Column temperature:40 C ->

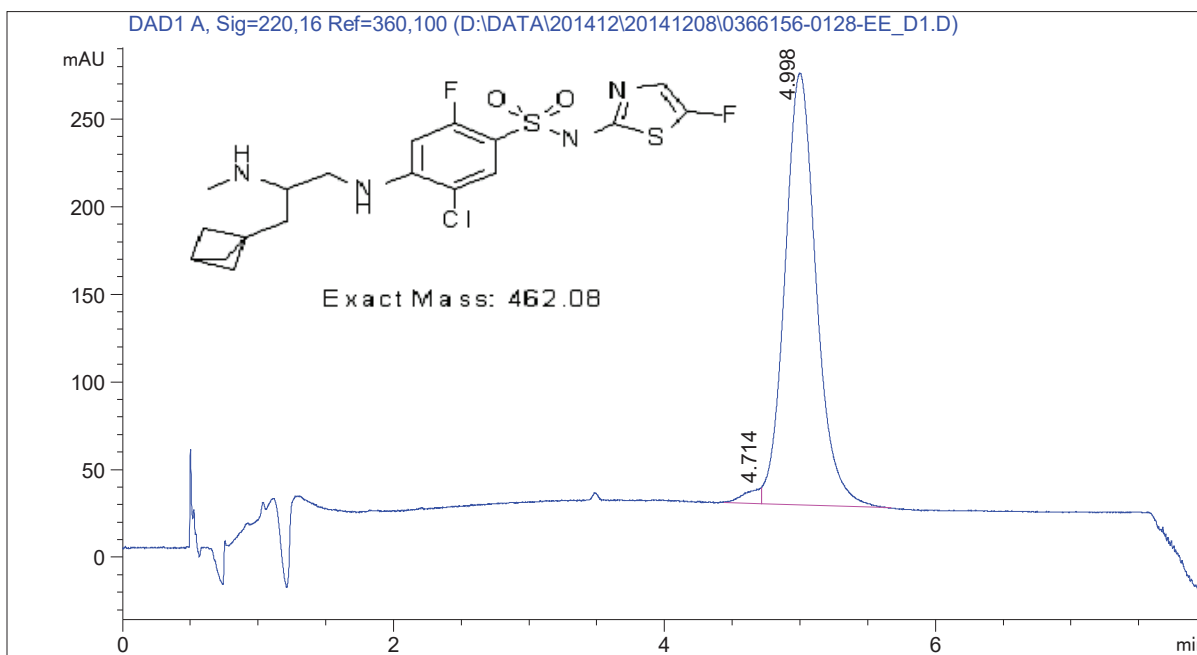

DAD1 A, Sig=220,16 Ref=360,100

| # | Meas. | Ret. Time | Height  | Height % | Width | Area     | Area % |
|---|-------|-----------|---------|----------|-------|----------|--------|
| 1 |       | 4.714     | 8.951   | 3.507    | 0.133 | 71.425   | 1.771  |
| 2 |       | 4.998     | 246.298 | 96.493   | 0.268 | 3960.628 | 98.229 |

Operator: \_\_\_\_\_

Date: \_\_\_\_\_
